# Supplementary material
Source: PubMed Central journal article supplement (PMC2478728)
Supplement: NIHMS56562-supplement-01.pdf [file NIHMS56562-supplement-01.pdf]

## Supplemental Data

### Analysis of Homeodomain Specificities

### Allows the Family-wide Prediction of Preferred Recognition Sites

Marcus B. Noyes, Ryan G. Christensen, Atsuya Wakabayashi, Gary D. Stormo, Michael H. Brodsky, and Scot A. Wolfe

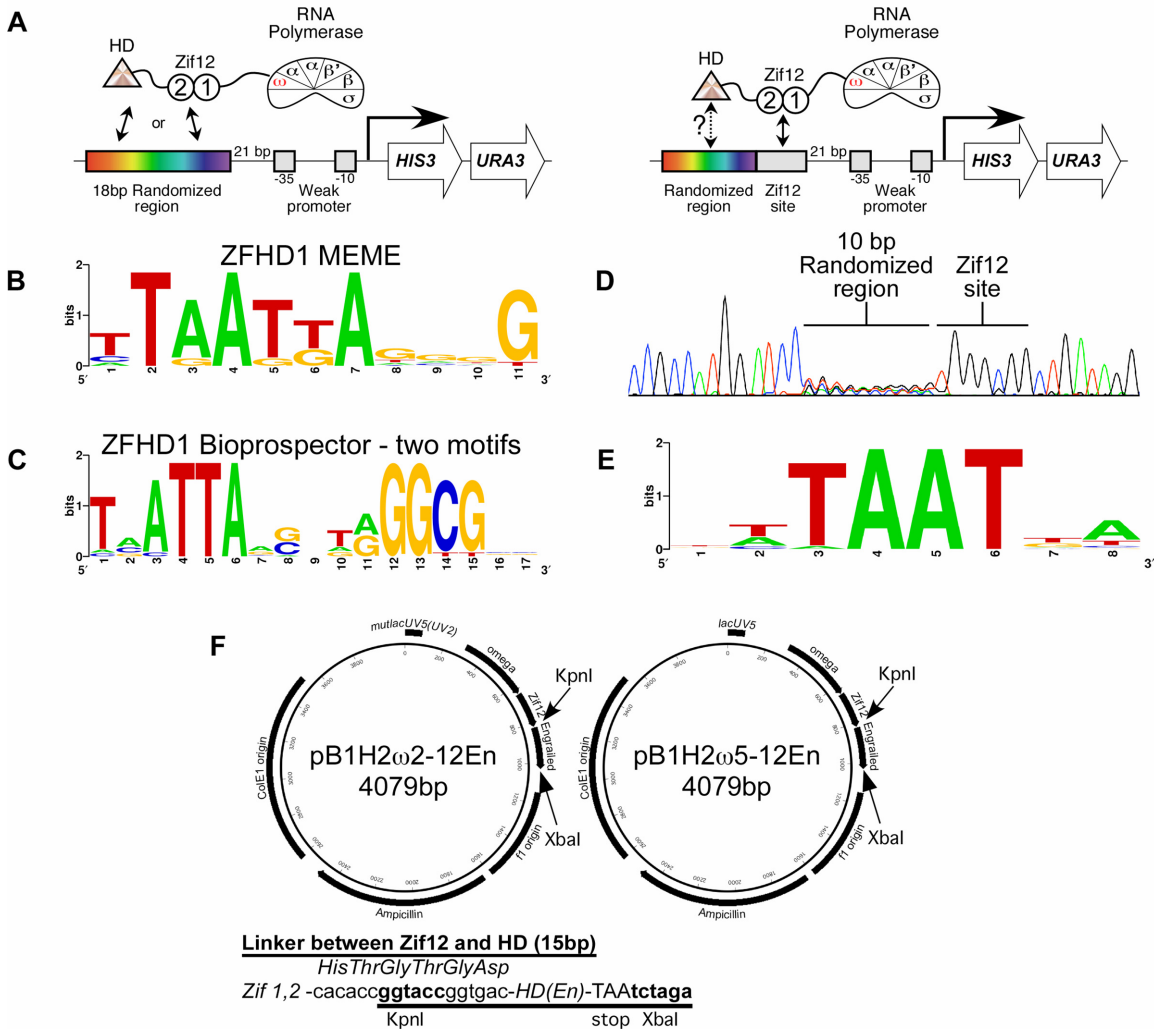

**Figure S1.** The ZFHD1 framework for determining DNA-binding specificity. A. (left) Cartoon depicting the interaction of the omega-ZFHD1 construct with a reporter with a 18 bp randomized window and (right) one that has a fixed binding site for the Zif12 DNA-binding domain in the context of the ZF10 library. B and C. The logos resulting from the ZFHD1 selection using the 28 bp library as determined by MEME (B. searching for one motif) and by BioProspector (Liu et al., 2001) (C. searching for 2 separate motifs). The discovered motifs in the BioProspector analysis are consistent with the specificity of Zif12 and Oct1

(Pomerantz et al., 1995). D. Sequence chromatogram of the ZF10 library prior to selection with a transcription factor where the 10 bp randomized region and the Zif12 binding sites are indicated. E. The logo resulting from the ZFHD1 selection on the ZF10 library.  $5 \times 10^7$  bacteria containing the ZF-10 library and the omega-Zif12-Oct1 expression vector were selected on minimal medium lacking histidine and containing 10 mM 3-AT. Approximately 2000 colonies survived the selection, which represented a > 100-fold increase over the number of surviving clones in the omega-Zif12 negative control. MEME analysis of 22 unique sequenced clones recovered a motif consistent with the specificity of Oct1 from 22 of 22 sequences (Pomerantz et al., 1995; Verrijzer et al., 1992). F. The maps of the bait plasmids used to characterize the homeodomains as omega-Zif12 fusions with key features annotated. These plasmids allow a homeodomain to be characterized at two different promoter strengths: either expressed under control of the *lacUV5* or a mutant *lacUV5* (*lacUV5mut*) promoter. Homeodomains were introduced by simply subcloning between the unique KpnI and XbaI sites in each plasmid. The linker between Zif12 and the TF is indicated below the plasmids.

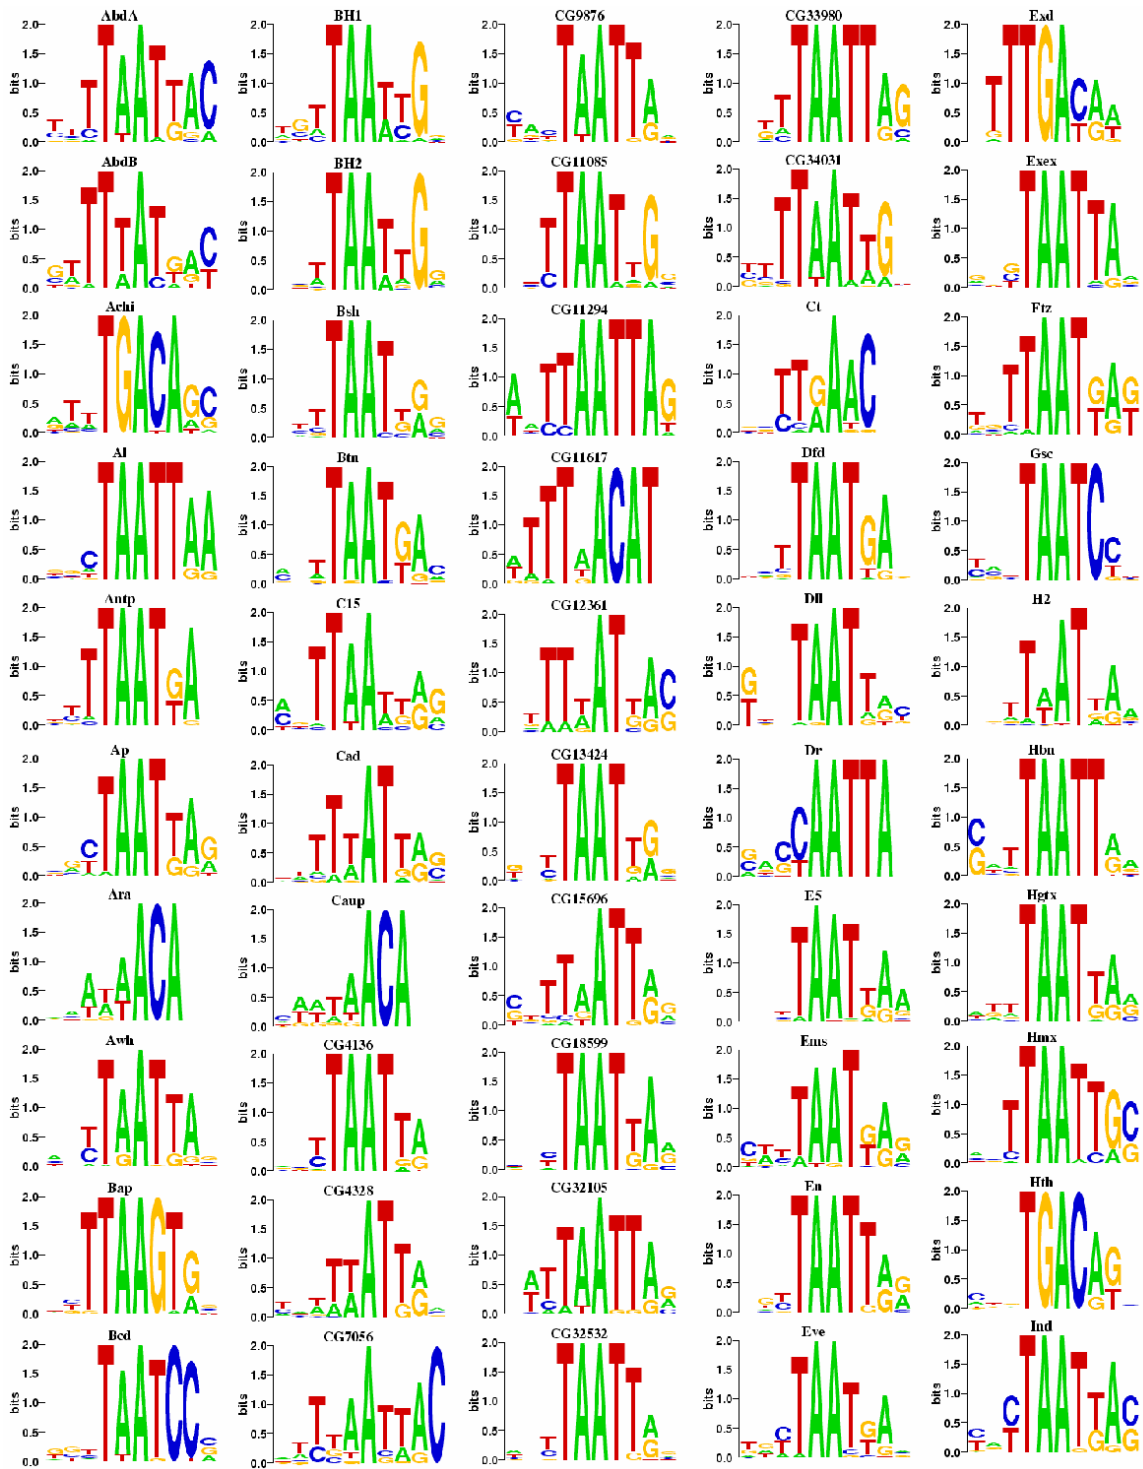

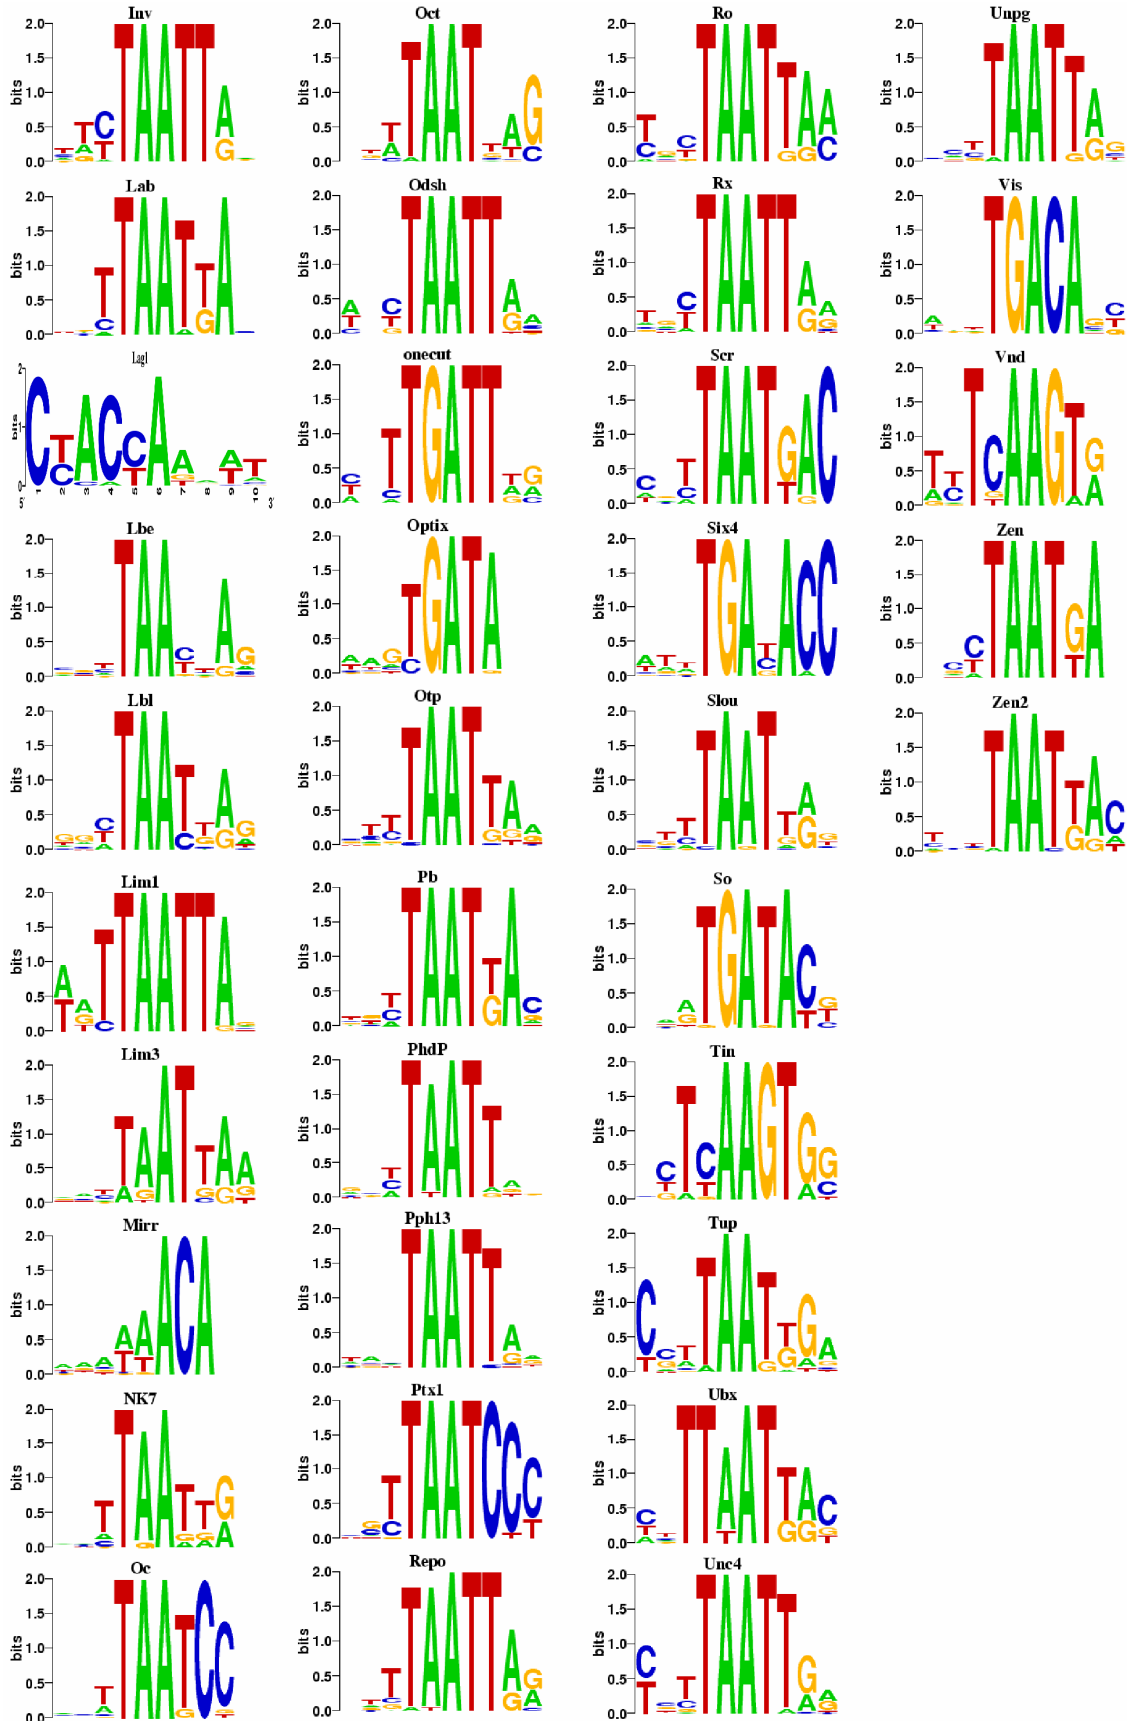

**Figure S2.** Sequence logos for 84 homeodomains determined in this study. Binding site alignments for each of the 84 homeodomains were extracted from the master alignment of sites. We generated Sequence logos (Schneider and Stephens, 1990) for each of these alignments using WebLogo version 2.8 (Crooks et al., 2004). WebLogo converts alignments to count matrices. Gaps are treated as missing data and ignored, thus not all column count totals are equal. There are no gaps in the core portion of the master alignment, however (columns 4 through 8, see Experimental Procedures).

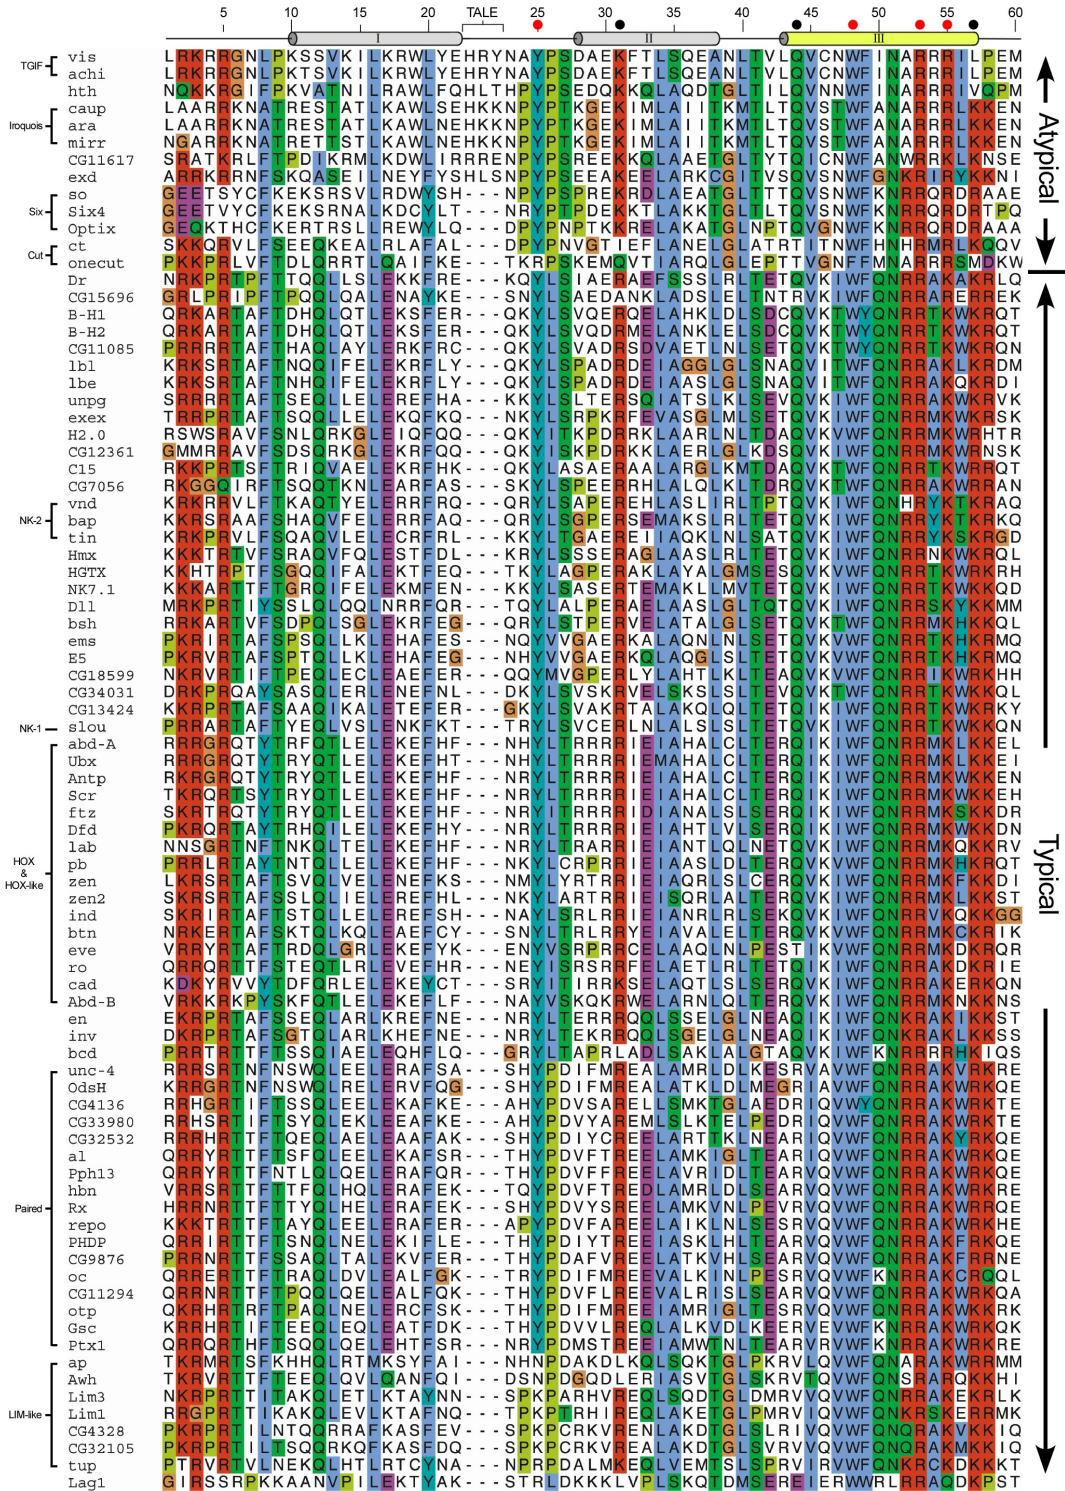

**Figure S3.** ClustalW alignment of the homeodomain motifs from the 84 homeodomains examined in this study. The position of each amino acid in the canonical homeodomain numbering scheme is indicated at the top of the alignment, along with cylinders that indicate the position of the three alpha helices in the structure. The homeodomains can be divided into two broad superclasses: the Atypical (top) and Typical (bottom), which have distinguishing sequence features and recognition motifs. One of the most prominent sequence differences is the presence of a three amino acid loop extension (TALE) between helix 1 and 2

## Cell, Volume 133

within the majority of the atypical homeodomains (Banerjee-Basu and Baxevanis, 2001; Mukherjee and Burglin, 2007). Where clearly defined, the classes that the homeodomains fall within are indicated to the left of their names (Banerjee-Basu and Baxevanis, 2001; Harvey, 1996). Colored residues at each position within the alignment indicate a high frequency of occurrence of residues with similar properties, with the exception of Gly and Pro, which are highlighted throughout these sequences. Filled circles above the sequences indicate positions that make phosphate contacts in the structures of both typical and atypical homeodomain-DNA complexes (Fraenkel et al., 1998; Joshi et al., 2007; Wolberger et al., 1991). Red circles indicate positions where an amino acid type capable of making a phosphate contact is conserved in all Asn51 containing homeodomains. At these seven common phosphate-contacting positions 95% (79 of 83) have an appropriate residue for this interaction at 6 of the 7 positions. In the case of position 31, the absence of a Lys or Arg can be compensated by one at position 46, as either position can contact a common phosphate (Grant et al., 2000). Not surprisingly, two of the outliers with regards to conserved phosphate contacts are Cut and One cut, which display unique specificities.





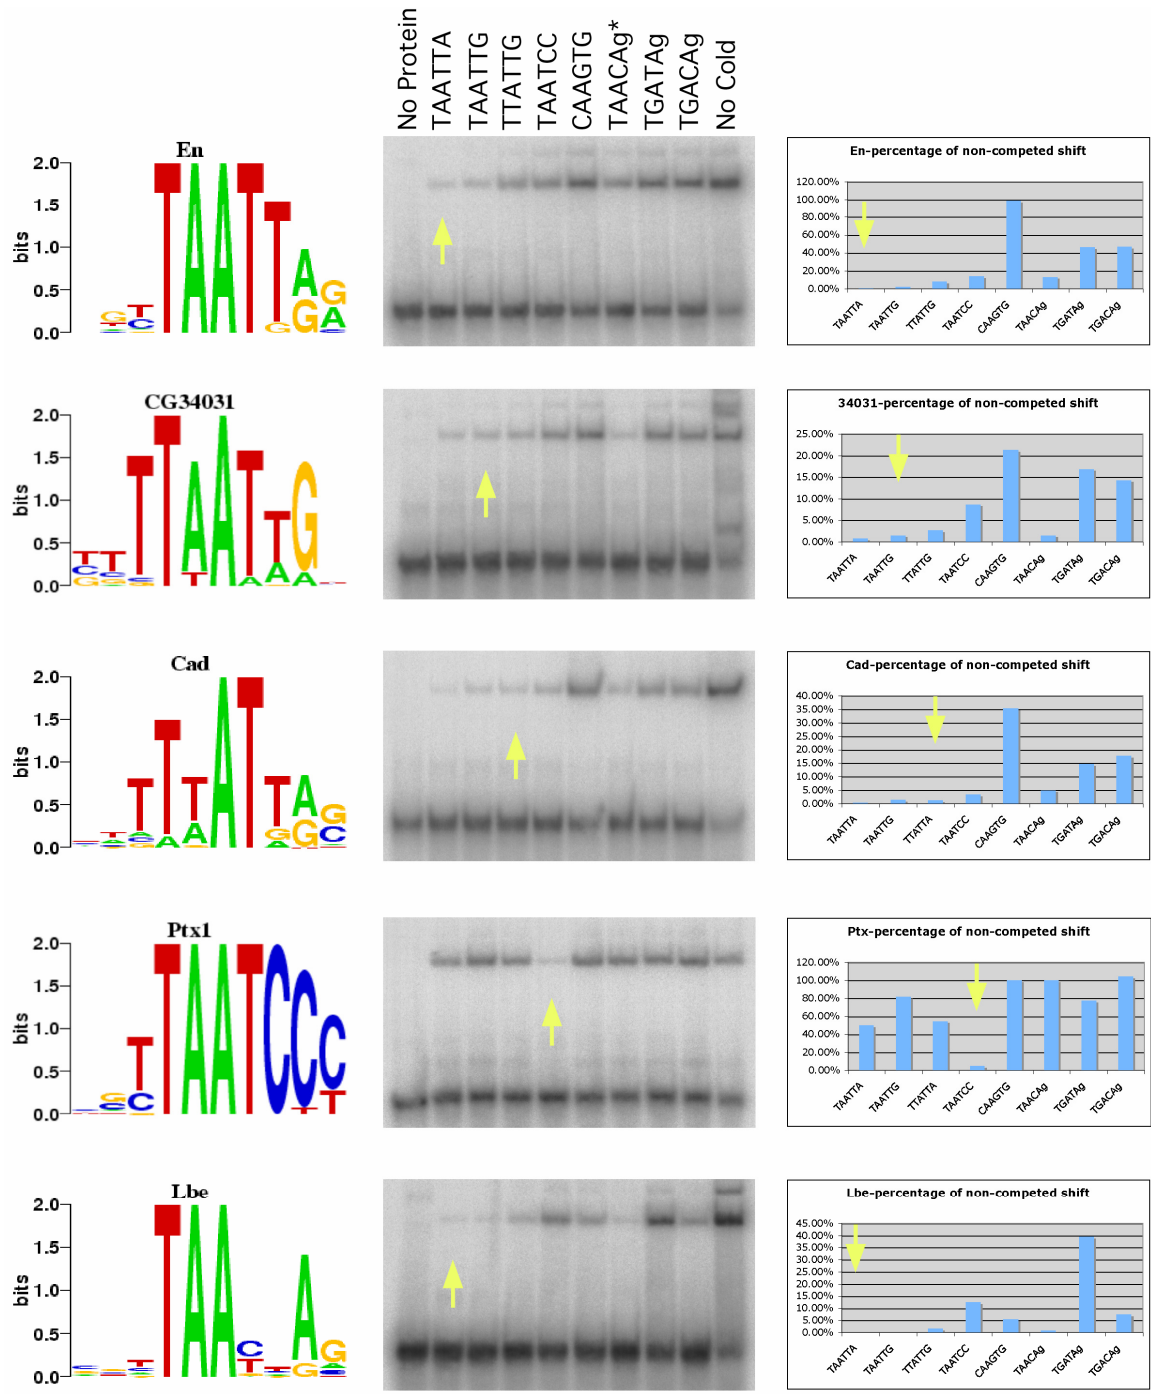

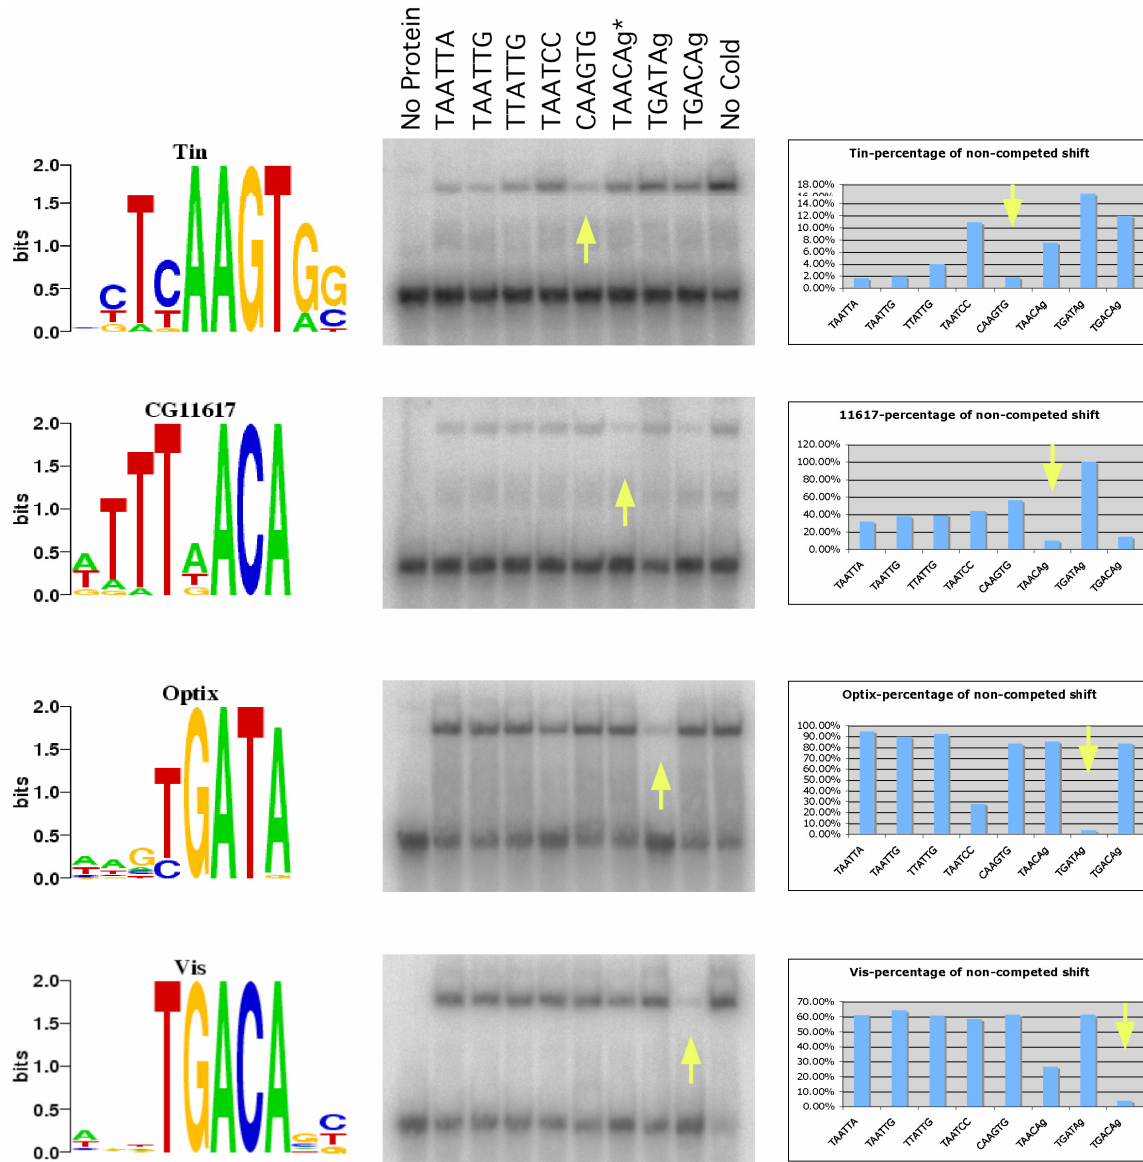

**Figure S5.** Competitive gel shift assays for nine different fly homeodomains representing nine different specificity groups. The sequence logo for the factor used in each assay is shown on the left of each row. Radiolabeled DNA containing the consensus binding site for each factor was challenged with excess cold competitor DNA containing sequences from the various specificity groups. Each lane represents a different competition, where the cold competitor and protein are at constant concentrations, with the exceptions of the far left (no protein) and far right (no competitor) lanes. The sequence of the homeodomain binding site used in each competition is indicated at the top of the page, where they are at identical positions in each assay. A yellow arrow indicates the competitor that is identical in sequence to the radiolabeled probe. The quantification of the change in percent shift as a function of the concentration of cold competitor is shown on the right where these values are normalized to the percent shift in the no competitor lane. A yellow arrow indicates the competitor that is identical in sequence to the radiolabeled probe. The neighboring 5' constant region of each binding site is CAG with the exception of the indicated site (\*), which contains an additional T (CAGT). The reverse complement of this element with a portion of the binding site creates an element "TAAGT" which may compete somewhat effectively with some of the typical homeodomains.

## Orientation?

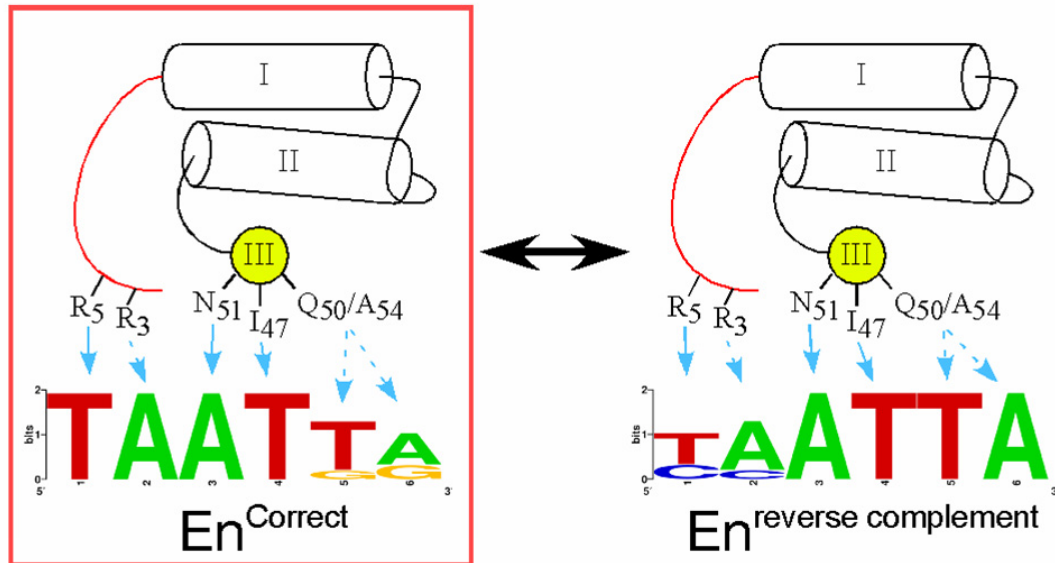

**Figure S6.** Determining the orientation of the homeodomain on a selected site. To correlate differences in homeodomain specificity with differences in their amino acids, it is also critical to determine the orientation of the homeodomain with respect to the motif. For example, if the consensus sequence for a factor defined from a selection is TCATTA, the N-terminal arm might either specify the TC at the 5' end of this sequence or the TA at the 5' end of the complimentary sequence TAATGA. In this study, base positions predicted to interact with the N-terminal arm are at the 5' positions of the motif (Figure 1). Previous structural and mutagenesis studies of well-characterized homeodomain proteins such as En, Ubx, and Bcd have defined the orientation of the homeodomain on its binding site (Ades and Sauer, 1994; Ekker et al., 1992; Fraenkel et al., 1998; Hanes and Brent, 1989; Percival-Smith et al., 1990; Treisman et al., 1989). For factors, such as En, that can bind a pseudo-C2 symmetric binding sequence (e.g. TAATTA), it is not immediately obvious from the binding site logo alone how the sequence motif should be orientated. Fortunately, the short tether between the omega-Zif12 module used for the B1H selection and the homeodomain biases the location of binding sites recovered from the randomized library. Homeodomain binding sites that neighbor the fixed Zif12 binding site are preferentially recovered on the DNA strand complementary to the Zif12 binding site. In contrast, more distant homeodomain sites are generally recovered on the same strand as the Zif12 binding site. This positional bias is most easily observed in the selected binding sites of a factor such as Bcd, which binds a clearly asymmetric binding sequence (TAATCC, Supplementary Table 2). This site bias can be used to define the orientation of the homeodomain on the consensus sequence, which facilitates the comparison of recognition sequences for each homeodomain in a common register.

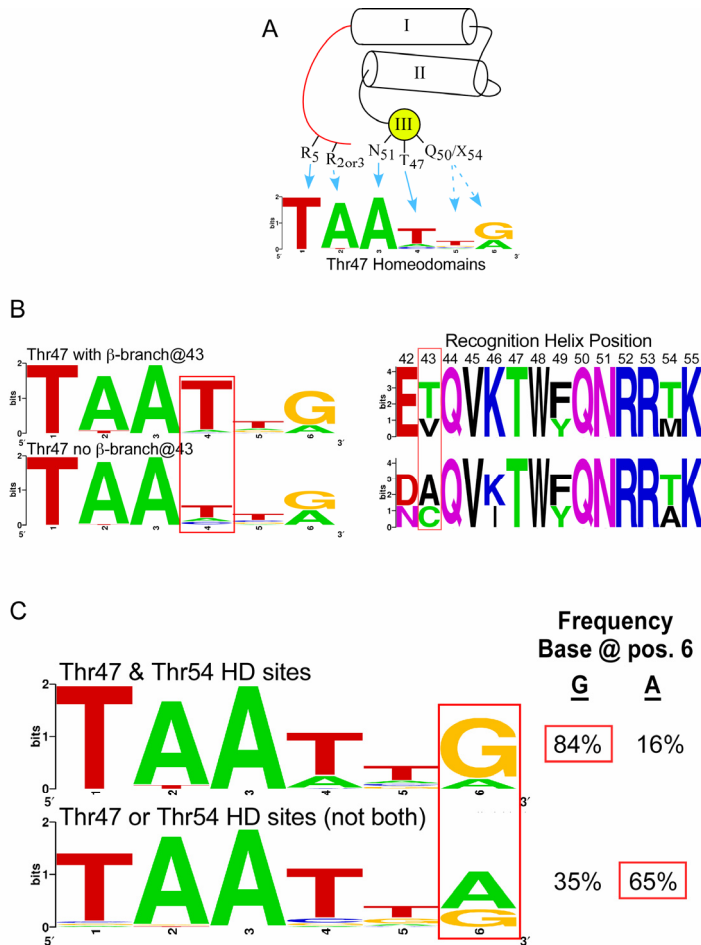

**Figure S7.** Secondary effects influence recognition for Thr47 containing homeodomains. A) Schematic of the potential interactions between the Thr47 containing homeodomains and their binding sites. When the eight typical homeodomains that contain Thr at position 47 are considered together, they display a clear reduction in specificity at binding site positions 4 and 5 of their as assessed by the information content at these positions. B) This set of Thr47-containing factors can be divided into two sub-sets with regards to the degree of preference for Thy at position 4 of their binding site. Factors that contain a  $\beta$ -branched amino acid at position 43 (Bsh, CG11085 & CG34031) display a strong preference for Thy at position 4, while the remaining five factors (Lbe, Lbl, B-H1, B-H2 & C15) display only a weak preference. The difference between these two motifs is statistically significant ( $p$ -value =  $2.48e-4$ ). Because amino acids at positions 43 and 47 are on the same face of the recognition helix and are in van der Waals contact in some crystal structures (Piper et al., 1999), it is plausible that the type of residue at position 43 could bias the preferred conformation of Thr47 and thereby influence its binding site preference. The Sequence logos of the recognition helices for each subgroup (not corrected for small sample size) are shown to the right of their motifs. C) The combination of Thr47 and Thr54 leads to a preference for Gua over Ade at binding site position 6 for the factors within the Bar group. Five of these factors (BH-1, BH-2, CG11085, CG34031 & C15) contain Thr at positions 47 and 54 of the recognition helix and display a strong preference for Gua at binding site position 6, a preference that is not observed in any of the other homeodomain groups. Ten other homeodomains (Bsh, Lbl, Lbe, NK7.1, CG7056, Slou, CG13424, Hgtx, E5 & Ems) that contain Thr at either but not both positions, display a preference for an alternate base, typically A, at position 6. This difference is statistically significant ( $p$ -value =  $7.05e-18$ ). Mechanistically, how the presence of Thr at positions 47 and 54 would create a preference for Gua at position 6 of the binding site is not obvious as these residues are separated by 2 helical turns and appear more appropriately positioned to influence specificity at binding site positions 4 and 5. This combination could indirectly affect specificity at binding site position 6 through an influence on the sequence preference of Gln50.

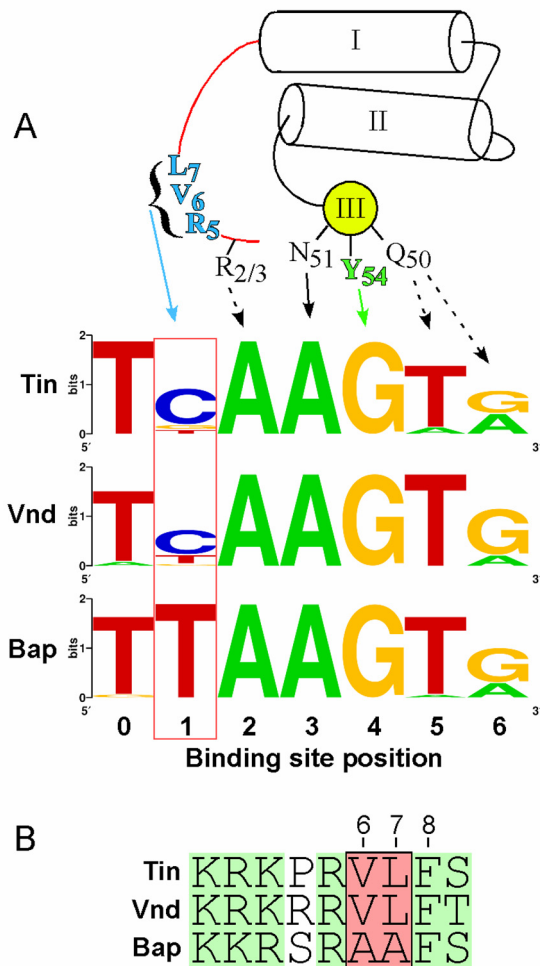

**Figure S8.** Residues at positions 6 and 7 of the N-terminal arm can influence the specificity at position 1 of the binding site. A) The three NK-2 class family members that share Tyr at position 54 display very similar overall specificities with the exception of binding site position. Bap (NK3) prefers a TAAGTG sequence, while Tin (NK4) and Vnd (NK2) prefer CAAGTG. A vertebrate homolog of Bap, Nkx3.2 displays an identical consensus sequence TAAGTG (Kim et al., 2003). The modest preference for Cyt at binding site position 1 has been observed for homologs of Tin and Vnd in other species and has been particularly well characterized in bovine TTF-1, which recognizes CAAGTG (Damante et al., 1996). Damante and colleagues narrowed the residues responsible for the Cyt preference at position 1 to the residues at positions 6 through 8 (VLF) in the N-terminal arm (Damante et al., 1996). They demonstrated that when these residues are substituted for the QTY in the N-terminal arm of Antp, its specificity was altered from a strong preference for Thy at binding site position 1 to a tolerance for Cyt or Thy. B) Consistent with this analysis, both Tin and Vnd have VLF motif at these positions in the N-terminal arm, while Bap contains an AAF motif. Our results allow us to further narrow the key residues responsible for the alteration in the specificity observed in the NK-2 family at binding site position 1 to residues at positions 6 and 7 in the N-terminal arm, since F is shared between all three NK-2-type factors. Only one other *D. melanogaster* homeodomain, Cut, has the VL motif at positions 6 and 7 of the N-terminal arm and it tolerates either Thy or Cyt at position 1 in the binding site, although there is a modest preference for Thy (Supplementary Figure 3). This Thy preference in Cut may be due to the presence of a contact to binding site position 2 by Arg55, which can influence the preference for Thy at position 1 in the binding site as described in the text (Figure 3B). A structural explanation for this influence is unavailable, but it is possible that the packing of the VL motif against the homeodomain fold positions a backbone carbonyl to favorably interact with the N2 position of the complementary Gua in the minor groove.

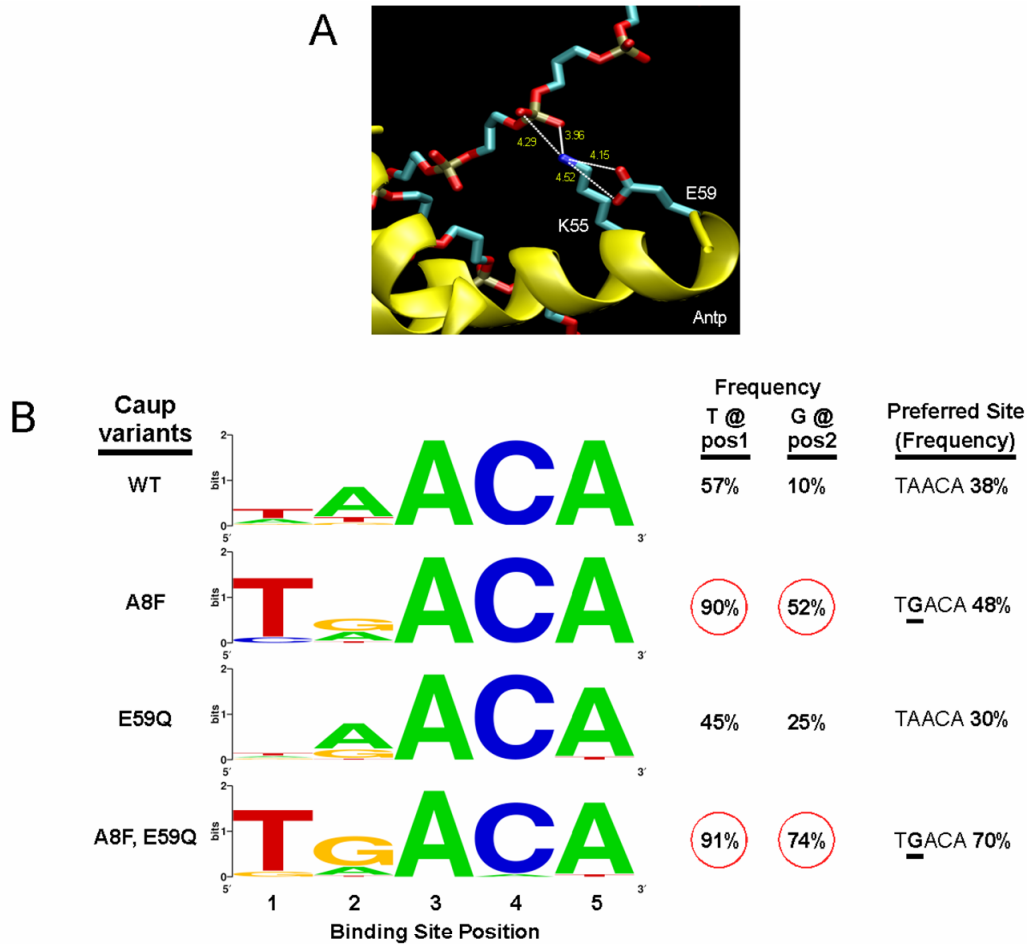

**Figure S9.** Glu59 may influence the specificity imparted by Arg55 in Caup. The presence of glutamate at position 59 of the homeodomain may also be influencing the degree of preference for Gua at position 2 of the binding site by capturing Arg55. A) A “cationic trap” is present in the Antp structure where Lys55 is captured against the phosphate backbone by Glu59 (Fraenkel and Pabo, 1998). Dotted lines indicate the distances between the lysine amino group and the negatively charged oxygens on the phosphodiester backbone and the acidic side-chain. The Iroquois family has a conserved glutamate at this position that could potentially capture Arg55 against the phosphodiester backbone (Supplementary Figure 11). B) Mutation of Glu59 to Gln in the presence or absence of the A8F mutation results in an increase in the frequency of recovery of Gua at position 2 in the binding site. However, this change in specificity is modest when compared to the effect of the A8F mutation on specificity.

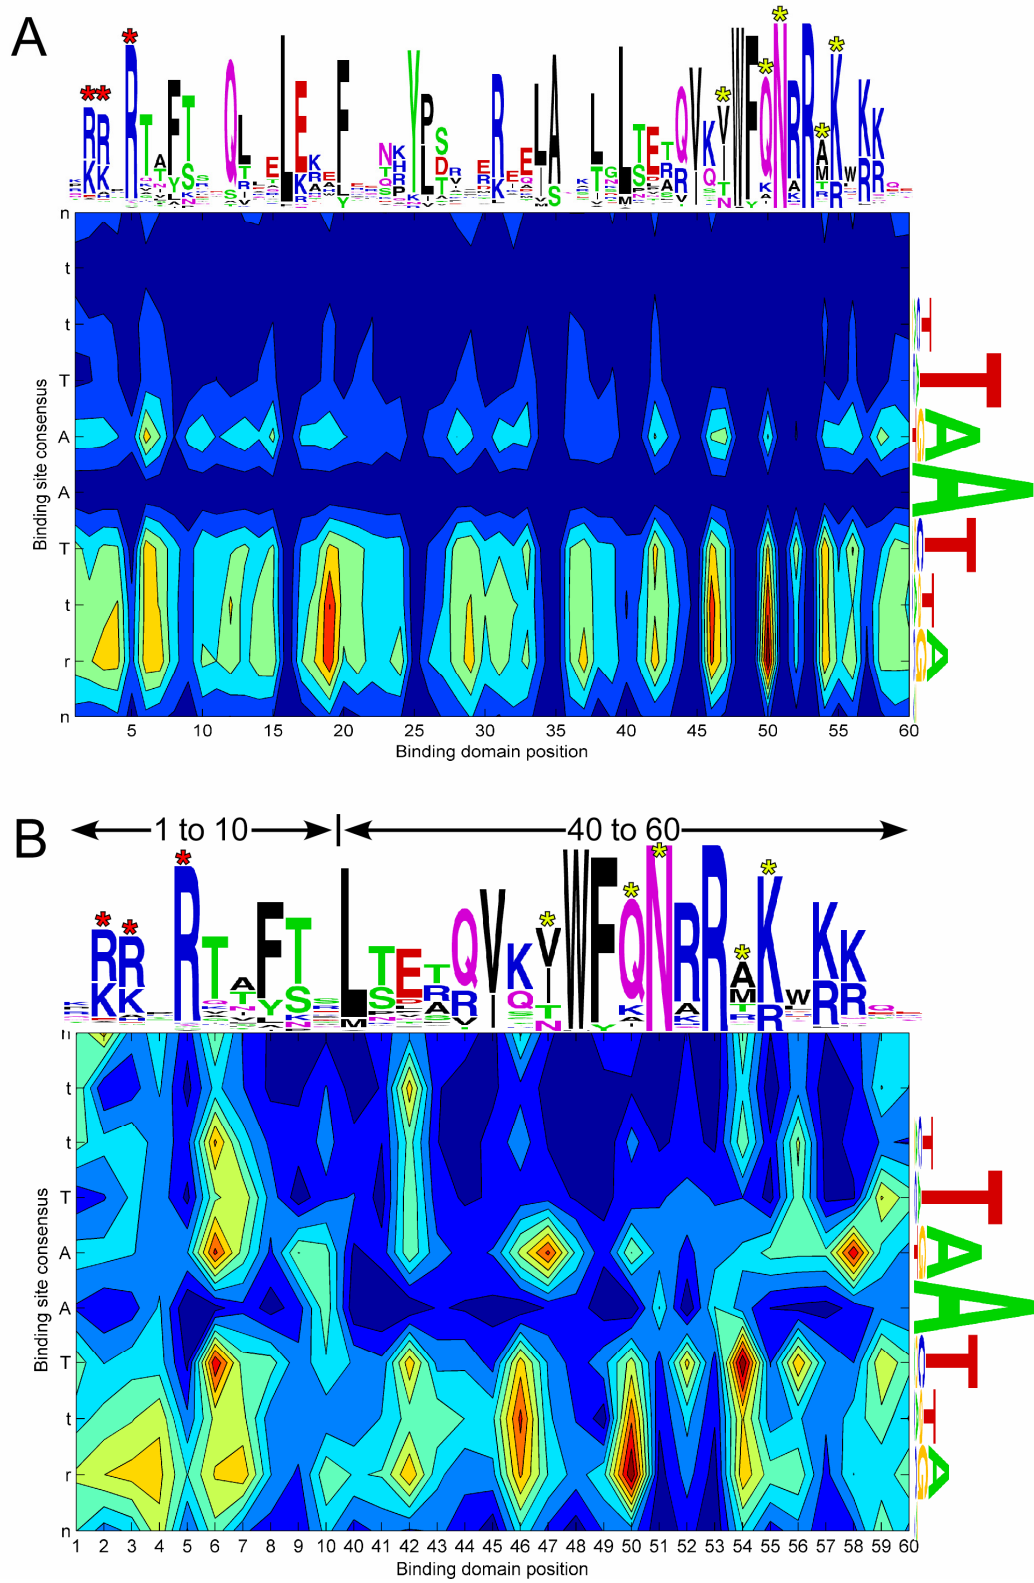

**Figure S10.** A) Heat plot of Mutual Information (MI) analysis between the amino acid sequences of the homeodomain and the master alignment of their selected binding sites. A two-dimensional heat plot is

shown where background levels of covariance are indicated in dark blue and positions with strong covariance are indicated in red. The x-axis indicates the position within the homeodomain (1 through 60), where the TALE insertions in the atypical family have been removed to achieve a common sequence framework. The amino acid diversity at each position is indicated by a Sequence logo above the plot. Key DNA-recognition positions are indicated by asterisks above the amino acid sequence. The y-axis indicates the position within the binding site (5' top, 3' bottom, with positions 1-4 capitalized). The overall motif of all of the binding sites is represented as a Sequence logo to the right of the plot. Overall the degree of covariation is higher at the 3' end of the binding site than for the 5' end of the site. Positions with little diversity in sequence composition have lower MI values, which is highlighted by the trough in the plot at the position corresponding to the Ade at position 3, which is highly conserved among the population of binding sites. Strong peaks are observed within the plot for expected base-amino acid contacts, such as between position 50 of the homeodomain and positions 5 and 6 of the binding site. B) Heat plot of the joint-ranked Mutual Information (jrMI) analysis. The background levels of covariance are indicated in dark blue and positions with strong covariation are indicated in red. Positions 1 through 10 and 40 through 60 in the homeodomain (x-axis) are shown to highlight the regions that are most likely involved in recognition.



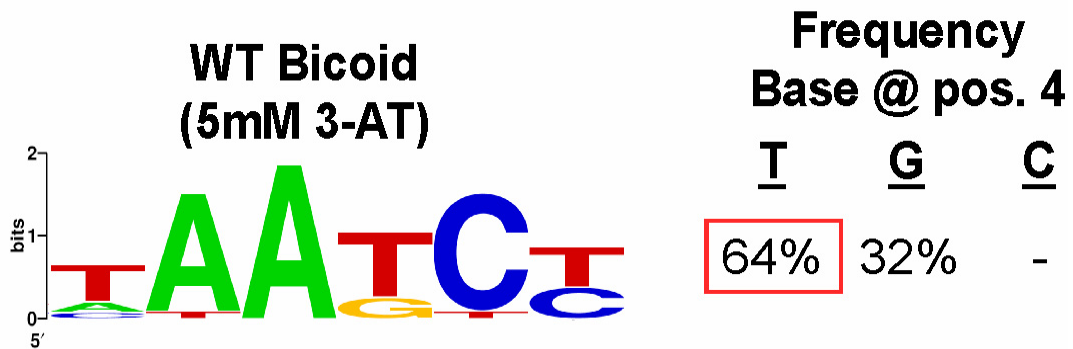

**Figure S11.** Binding site selection data for Bicoid collected from a selection performed at 5mM 3-AT instead of the typical stringency of 10 mM. The sequence preferences are preserved in this binding site selection except that Cyt and Thy are equally represented at position 6. There is increased tolerance for other bases at many positions, such as position 4 where Thy and Gua are both acceptable, but Cyt is still excluded from the binding sites at this position.

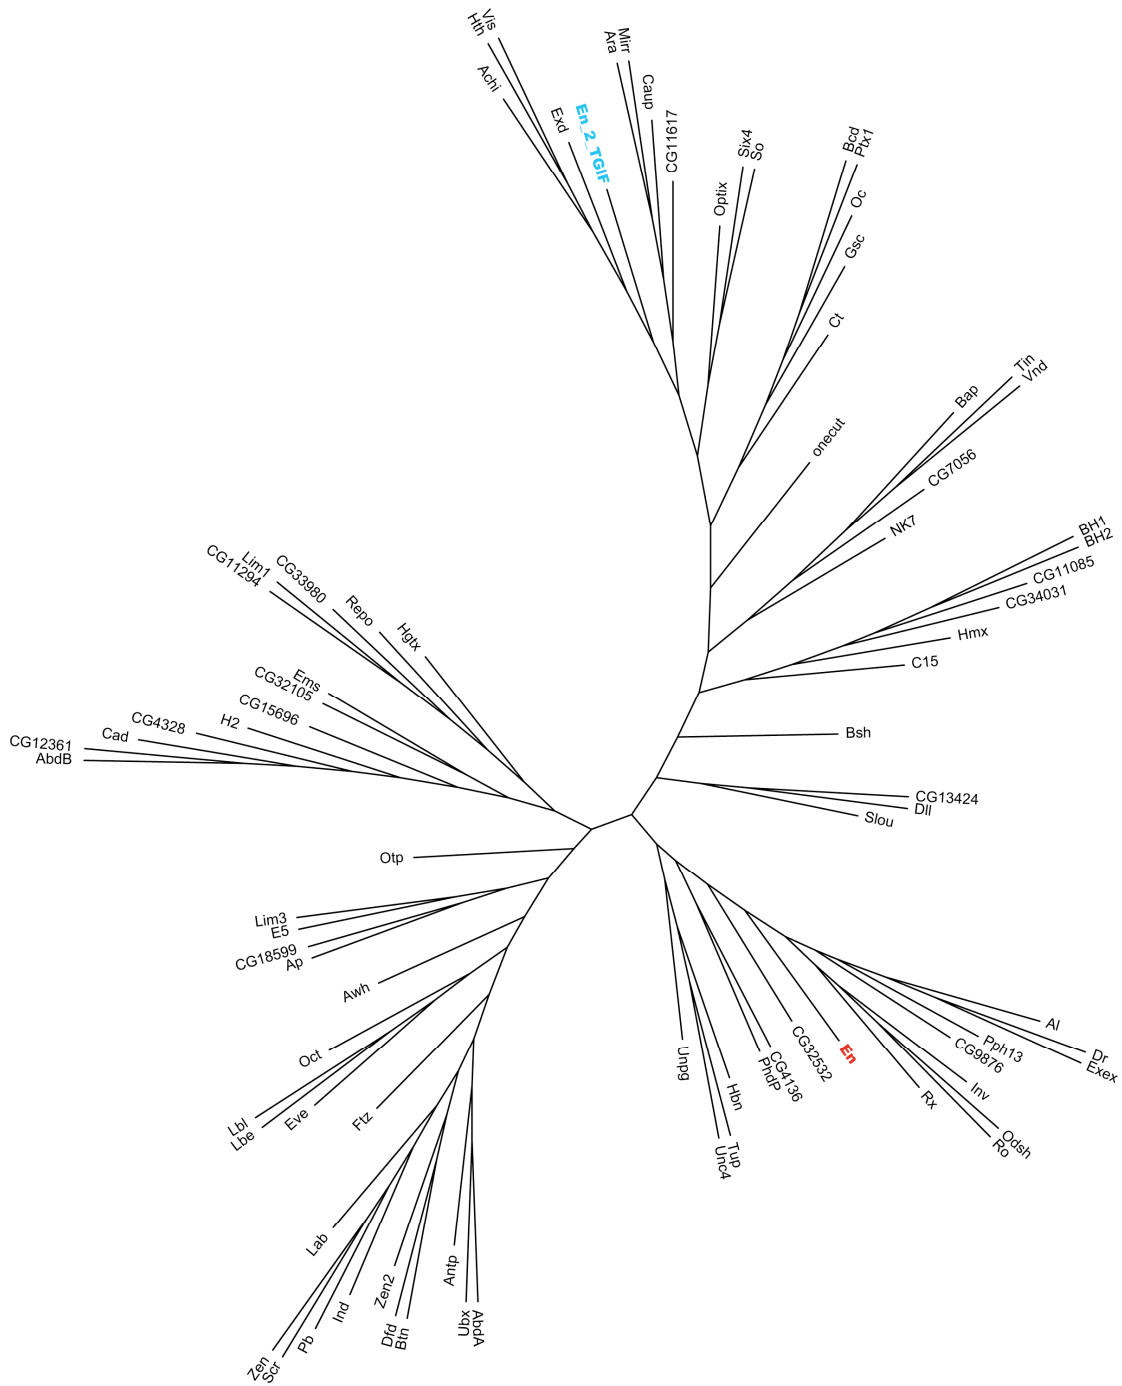

**Figure S12.** Clustergram of engineered En homeodomain that has TGIF-like specificity (**En\_2\_TGIF**; R3K, I47N, Q50A, A54R, K55R) with the entire set of fly homeodomains. The specificity of this factor clusters with the other members of the TGIF-Exd specificity group (Vis, Achi, Hth & Exd), which is significantly removed from its original position in the clustergram (**En**) with the En-group.

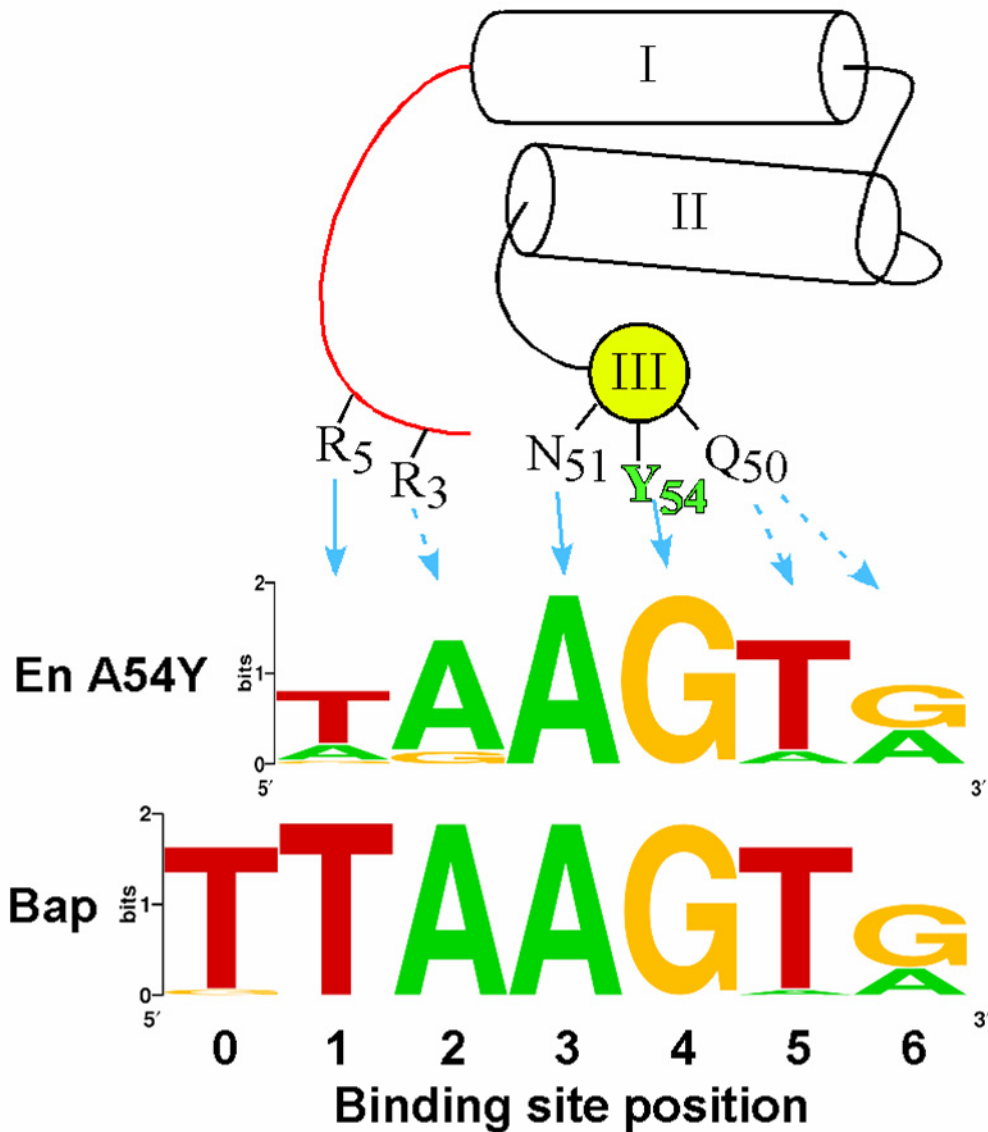

**Figure S13.** Conversion of Engrailed into a factor with an NK-2 type specificity. A single mutation was introduced into Engrailed at position 54 (A54Y) to attempt to convert this homeodomain into a specificity that is similar to the NK-2 class. This mutation has been introduced previously into Antp and Gsc with a resulting conversion of sequence preference at position 4 of the binding site from Thy to Gua (Damante et al., 1996; Pellizzari et al., 1997). We observe a similar phenomenon, where this single mutation is sufficient to convert the specificity of Engrailed at position 4 from Thy to Gua. For reference the specificity of Bap, a NK-2 family member, is shown below the specificity of the A54Y mutant.

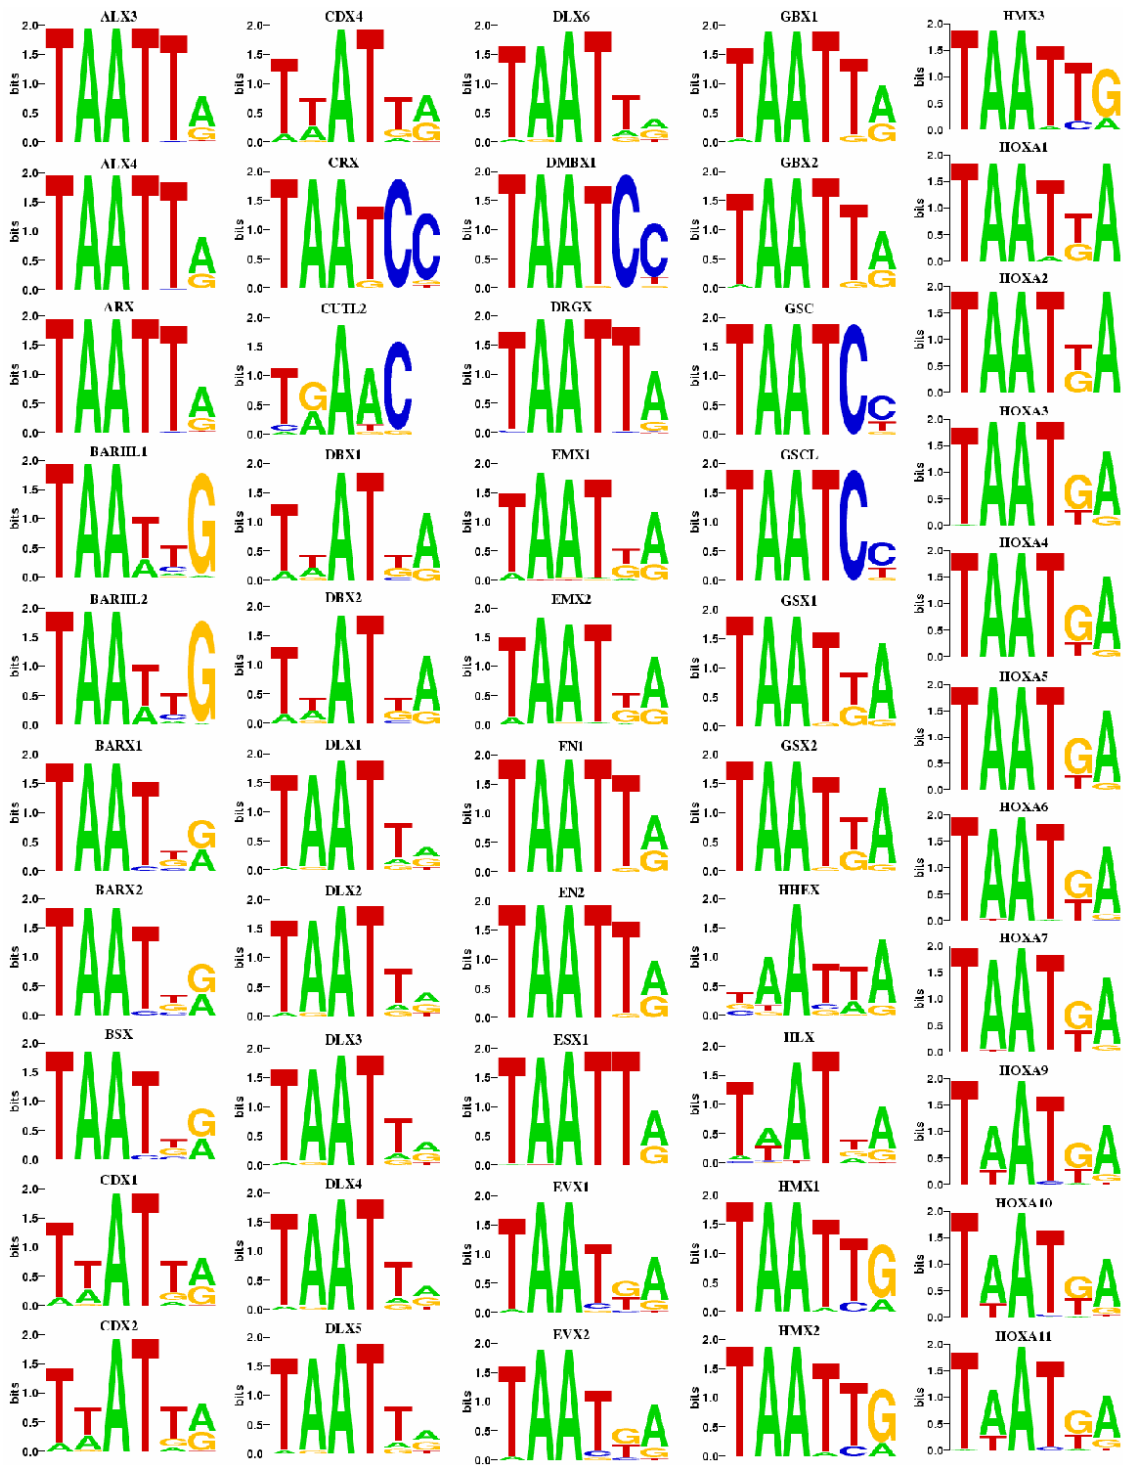

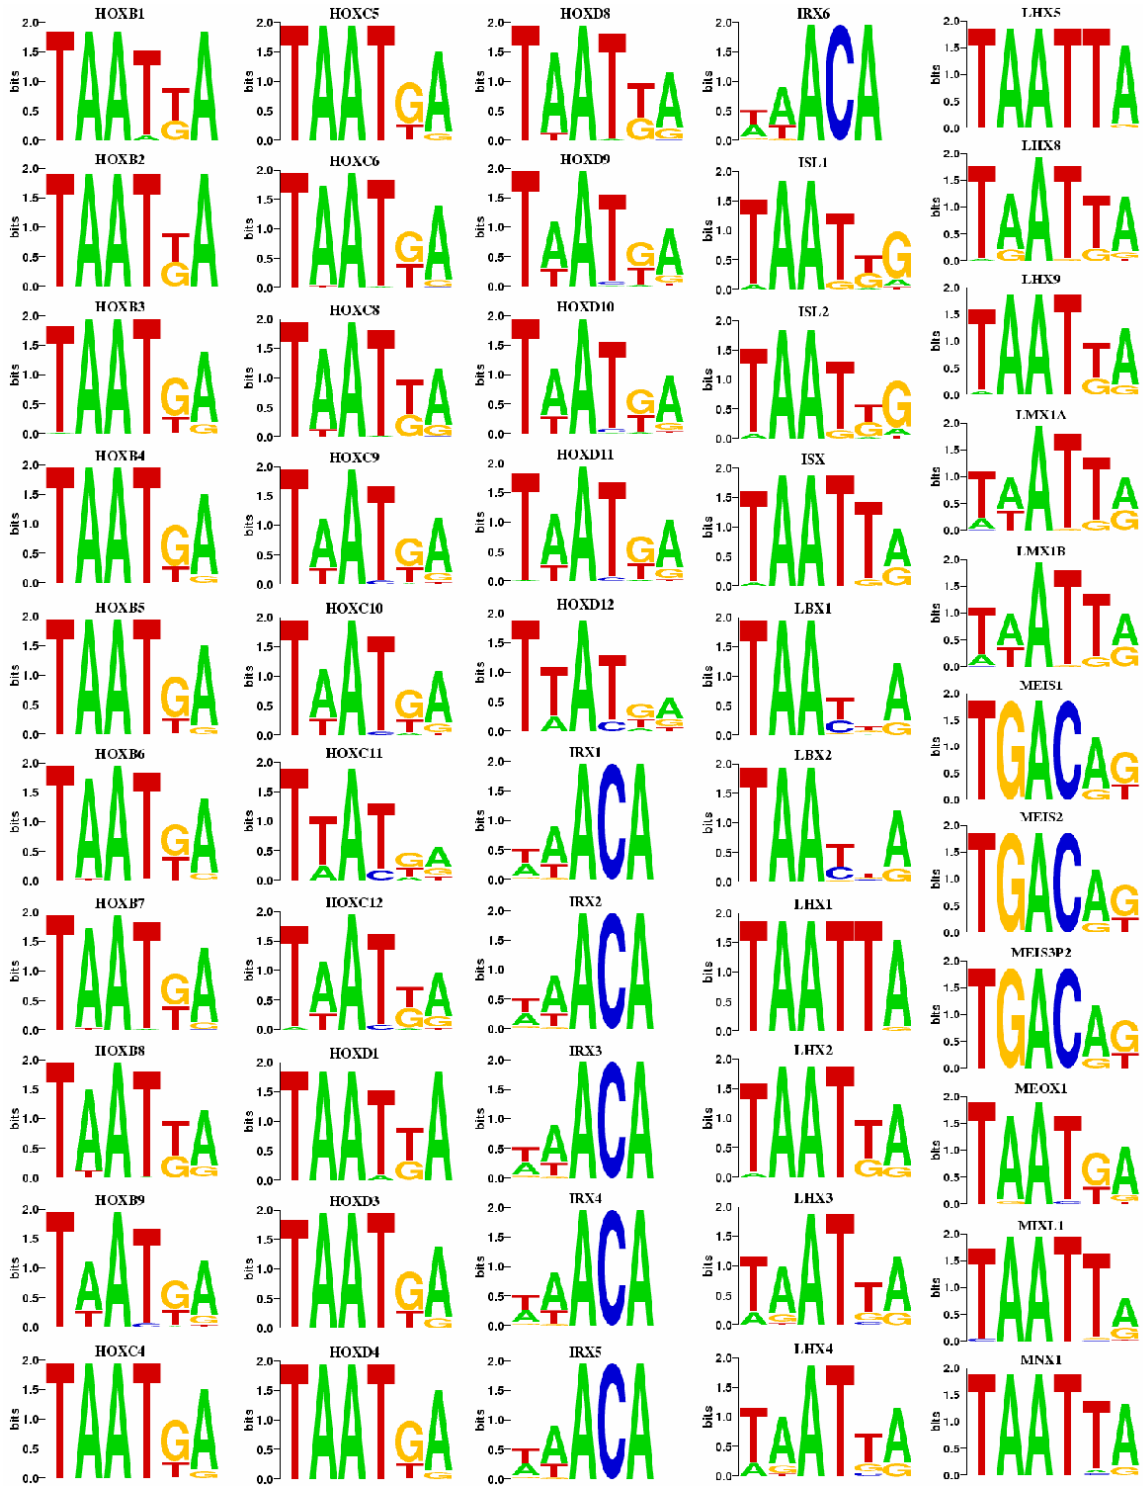

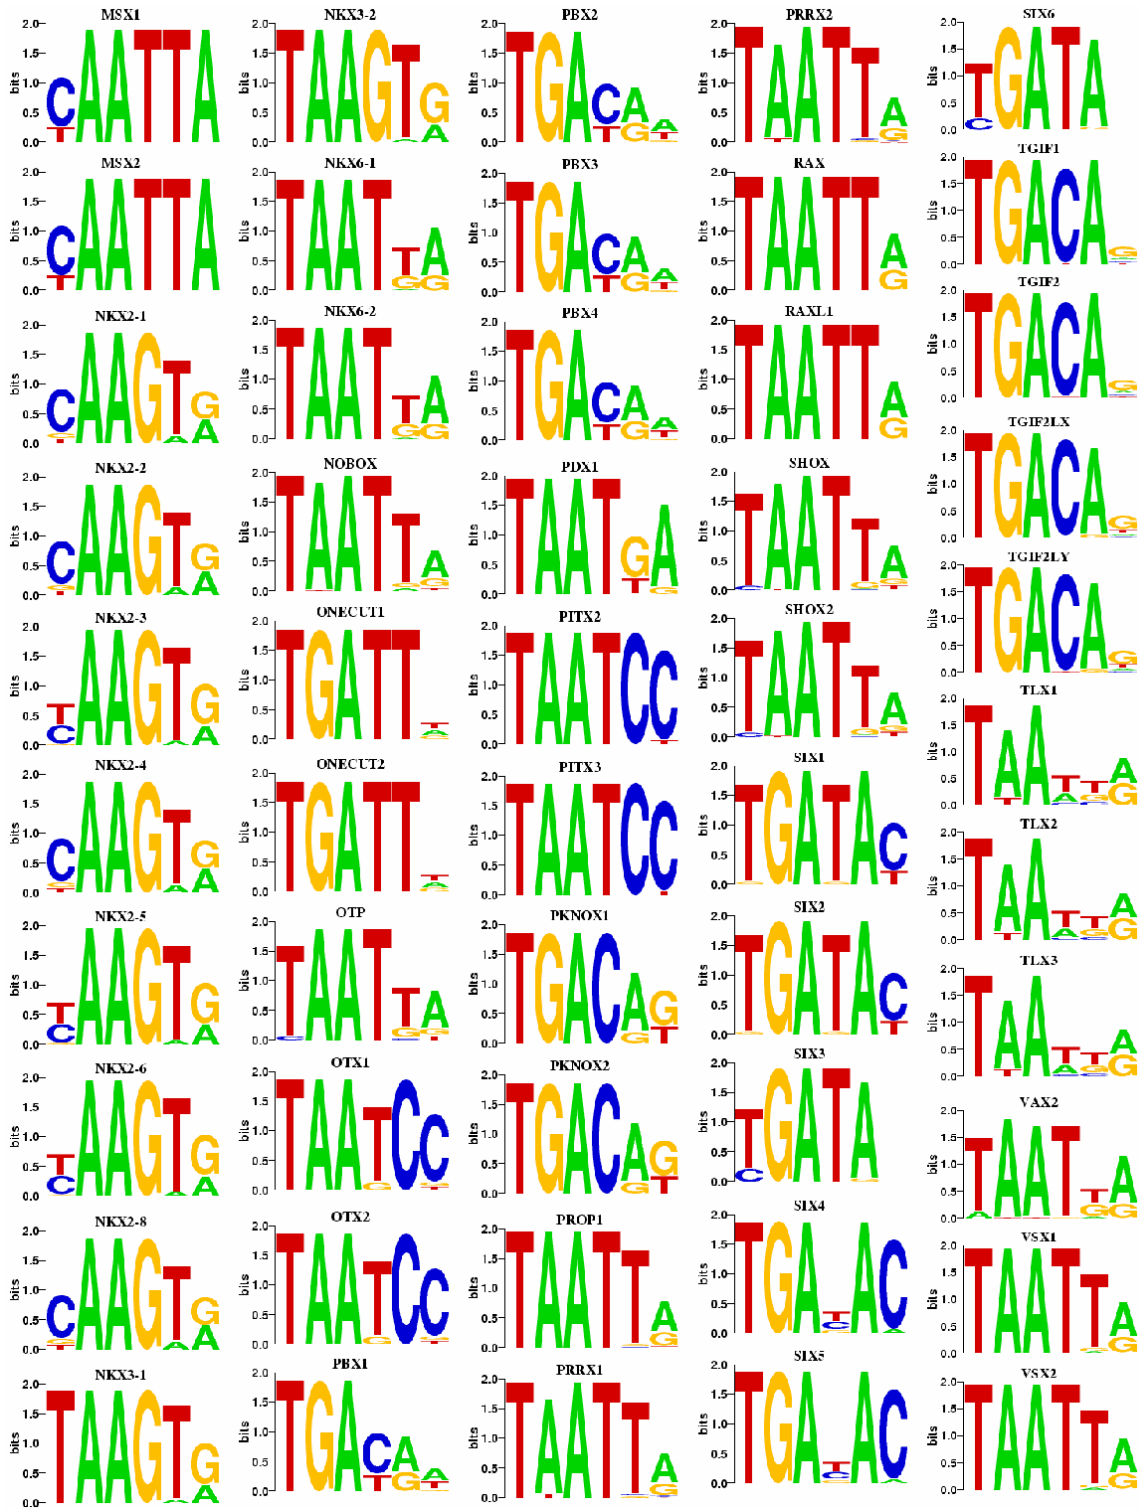

Figure S14. Sequence logos of the 153 predicted human homeodomains.

A

# Homeodomain Specificity Prediction

Enter or paste homeodomain DNA binding domain protein sequences in [FASTA](#) format:

upload FASTA file:  no file selected

Critical residues:  Key residues:

# of required key residue matches:

Substitution matrix:  Similarity score threshold:

# reference sequences:  Similarity score range:

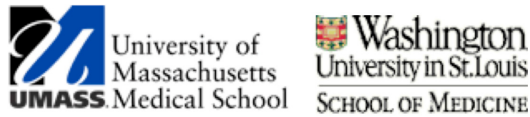

Last updated 02/18/2008 at 22:56:16

B

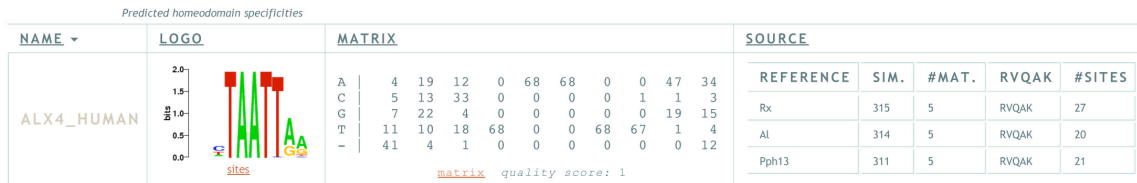

**Figure S15.** A. Splash page of interactive web-based homeodomain specificity prediction tool at <http://ural.wustl.edu/flyhd/>. Given a set of homeodomain protein sequences entered as a FASTA file, the program returns a set of predicted sites, a count matrix and a sequence logo for each query protein, as well as the set of reference proteins used to make each prediction. If the homology constraints are not met by any of the reference proteins, no prediction is made. Users can change the default parameters to define alternate sets of key and critical residues and different homology score constraints. B. Example of the information returned from the website upon entering the sequence of the Alx4 homeodomain. The sites used to construct the LOGO can be accessed by clicking the “sites” link. The quality score (1 to 4) under the MATRIX indicates the confidence level of the prediction where 1 is the highest confidence. Under SOURCE, the REFERENCE indicates the fly homeodomains used to construct the predicted LOGO where SIM.= similarity score, #MAT= number of matches at the key recognition positions, RVQAK are the amino acids at the key recognition positions in the query, with the corresponding residues of the utilized fly factors listed below, #SITES = number of unique sequences used from each fly factor.

**Table S2. Orientation of the homeodomain on each recovered sequence is apparent from the position of its binding site**

Selected sequences for Bicoid, Deformed and En (from the randomized region). All sequences are listed in the same orientation relative to the promoter of the reporter genes (toward the 3' side). Yellow highlight indicates the position of a binding site in the positive strand, magenta indicates the position of a binding site in the negative strand, and green indicates a palindromic site (orientation unknown). "Yellow" sites trend toward the 3' end of the sequence whereas "magenta" sites trend toward the 5' end of the sequence.

**Bicoid selected sequences**

|                     |                     |                     |                     |
|---------------------|---------------------|---------------------|---------------------|
| >bcd1               | TCT <b>TAATCC</b> C | >bcd13              | TGT <b>TAATCC</b> C |
| TGT <b>TAATCC</b> G | >bcd7               | TGT <b>TAATCC</b>   | >bcd20              |
| >bcd2               | GCT <b>TAATCC</b> G | >bcd14              | CGCT <b>TAATCC</b>  |
| AT <b>GGATT</b> AGA | >bcd8               | TG <b>GGATT</b> ATA | >bcd21              |
| >bcd3               | GGGT <b>TAATCC</b>  | >bcd15              | TTACT <b>TAATCC</b> |
| CGT <b>TAATCT</b> C | >bcd9               | GCG <b>TAATCC</b> A | >bcd22              |
| >bcd4               | GAG <b>TAATCC</b>   | >bcd16              | GTCC <b>TAATCC</b>  |
| GGTT <b>TAATCC</b>  | >bcd10              | <b>GGCTTA</b> AGCC  | >bcd23              |
| >bcd5               | AGCT <b>TATCC</b>   | >bcd17              | GGT <b>TAATCC</b> G |
| TCT <b>TAATCC</b>   | >bcd11              | GG <b>TATCC</b> G   | >bcd24              |
| >bcd6               | CGGG <b>TAATCC</b>  | >bcd18              | AT <b>GGATT</b> AGA |

**Deformed selected sequences**

|                       |                      |                      |                      |
|-----------------------|----------------------|----------------------|----------------------|
| >dfd1                 | >dfd7                | >dfd13               | >dfd19               |
| CT <b>TCATTA</b> AG   | GA <b>TAATTA</b> AT  | TCG <b>TAATGA</b>    | TAC <b>CTAATGA</b>   |
| >dfd2                 | >dfd8                | >dfd14               | >dfd20               |
| GG <b>TCATTA</b> AAT  | CC <b>TAATTA</b> AG  | TGCT <b>TAATGG</b>   | TGG <b>ATAATGA</b>   |
| >dfd3                 | >dfd9                | >dfd15               | >dfd21               |
| TAT <b>TCATTA</b> AAA | CC <b>CCATTA</b> AAT | ATCG <b>TAATTA</b>   | CGAC <b>TAATGA</b>   |
| >dfd4                 | >dfd10               | >dfd16               | >dfd22               |
| GG <b>TCATTA</b> AAT  | TTTT <b>TAATGA</b>   | CT <b>CATTA</b> CT   | TAT <b>TCATTA</b> AC |
| >dfd5                 | >dfd11               | >dfd17               | >dfd23               |
| G <b>TCATTA</b> ACA   | AG <b>CTATTA</b> AAA | CT <b>TCATTA</b> AAG | CCGT <b>TAATGA</b>   |
| >dfd6                 | >dfd12               | >dfd18               | >dfd24               |
| CC <b>TAATTA</b> AG   | GCAC <b>TAATGA</b>   | AG <b>TCATTA</b> AGG | CAAT <b>TAATGA</b>   |

**Engrailed selected sequences**

|                      |                      |                       |                      |
|----------------------|----------------------|-----------------------|----------------------|
| >En1A1               | >En1A11              | >En1B10               | >En1*B2              |
| CG <b>CAATTA</b> GA  | T <b>TAATTA</b> GGT  | TCA <b>ATTA</b> AGG   | AT <b>TAATTA</b> TC  |
| >En1A2               | >En1A12              | >En1B11               | >En1*B3              |
| GACT <b>TAATGA</b>   | CC <b>CAATTA</b> TGT | GCT <b>TAATTA</b> AAT | G <b>TAATTA</b> GG   |
| >En1A3               | >En1B2               | >En1*A1               | >En1*B4              |
| CTACT <b>TAATTG</b>  | T <b>TAATTA</b> GTA  | GTGT <b>TAATGA</b>    | AG <b>CAATTA</b> AAG |
| >En1A4               | >En1B3               | >En1*A4               | >En1*B5              |
| CC <b>CAATTA</b> TTT | TTTT <b>TAATTA</b>   | GCA <b>TAATTA</b>     | TG <b>TAATTA</b> GA  |
| >En1A5               | >En1B4               | >En1*A5               | >En1*B7              |
| CC <b>CAATTA</b> ACC | A <b>TAATTA</b> GTG  | ACA <b>ATTATA</b> A   | TT <b>TAATTA</b> AG  |
| >En1A6               | >En1B5               | >En1*A6               | >En1*B8              |
| CA <b>TAATTA</b> AAA | TC <b>CAATTA</b> AAG | A <b>TAATTA</b> AAA   | TAGT <b>TAATTA</b>   |
| >En1A7               | >En1B6               | >En1*A8               | >En1*B9              |
| CA <b>CAATTA</b> AC  | CC <b>CAATTA</b> GAT | AT <b>TCATTA</b> ACC  | AT <b>CAATTA</b> AG  |
| >En1A8               | >En1B7               | >En1*A9               | >En1*B10             |
| AG <b>TAATTA</b> CC  | <b>TAATTA</b> ACA    | GAT <b>TAATTA</b> TC  | CT <b>TCATTA</b> AGA |
| >En1A9               | >En1B8               | >En1*A10              | >En1*B11             |
| CT <b>TAATTA</b> GAG | GG <b>TAATTA</b> AA  | TATCAACCCC            | CT <b>TCATTA</b> GTG |
| >En1A10              | >En1B9               | >En1*A11              |                      |
| T <b>TAATTA</b> GAC  | GG <b>TAATTA</b> AC  | CCT <b>TCATTA</b> AA  |                      |



**Table S3. Master alignment of selected binding sites for Drosophila homeodomain family**  
 Master alignment of selected binding sites. Sequences that were identified for each factor to contain an overrepresented motif based on CONSENSUS analysis were aligned at the common Ade at binding site position 3 that is shared by all Asn51 containing homeodomains.

|                                    |                                         |                                          |                                            |
|------------------------------------|-----------------------------------------|------------------------------------------|--------------------------------------------|
| >Vis:VisG1b:-:5:1<br>aaaTGACAc-    | >Achi:AchiH11:-:3:19<br>cTTTGACAgc      | AGTTGACACc                               | AGCTGATA--                                 |
| >Vis:VisG2b:-:6:2<br>actTGACA--    | >Achi:achi2F1:+:3:20<br>gAATGACAa--     | >Six4:5Six4E11:+:2:1<br>1<br>GTATGATACc  | >Optix:Optix2A10:+:1<br>:41<br>CCGCAGATA-- |
| >Vis:VisG4b:-:5:4<br>aggTGACAt-    | >Achi:achi2F2:-:4:21<br>-TTTGACAac      | >Six4:5Six4E12:+:2:1<br>2<br>GTCTGACACc  | >Optix:Optix2A11:+:1<br>:42<br>GATTGATA--  |
| >Vis:VisG5b:+:4:5<br>-aaTGACAgc    | >Achi:achi2F3:-:2:22<br>gATTGACAg-      | >Six4:5Six4F1:+:2:13<br>ACATGACACc       | >Optix:Optix2A12:+:1<br>:43<br>CCTTGATA--  |
| >Vis:VisG6b:+:4:6<br>-gtTGACAcc    | >Achi:achi2F4:-:4:23<br>-TTTGACAgc      | >Six4:5Six4F2:+:1:14<br>AAGTGATAC-       | >Optix:Optix2B1:+:1:<br>44<br>TCGCAGATA--  |
| >Vis:VisG7b:-:6:7<br>agtTGACA--    | >Achi:achi2F6:+:4:25<br>aGATGACA--      | >Six4:5Six4F3:+:2:15<br>AATTGACACc       | >Optix:Optix2B3:+:1:<br>46<br>TTGCGATA--   |
| >Vis:VisG8b:+:2:8<br>cgaTGACAg-    | >Achi:achi2F8:-:3:26<br>-TTTGACAgg      | >Six4:5Six4F4:+:2:16<br>CTGTGACACc       | >Optix:Optix2B4:+:1:<br>47<br>GATTGATA--   |
| >Vis:VisG10b:-:4:10<br>tccTGACAgT  | >Achi:achi2F11:-<br>:4:29<br>-TTTGACAgc | >Six4:5Six4F5:+:2:17<br>TAATGATACc       | >Optix:Optix2B5:+:1:<br>48<br>AAGTGATA--   |
| >Vis:VisG1:-:5:13<br>aaaTGACA--    | >Achi:achi2F12:-<br>:3:30<br>gTTTGACAgg | >Six4:5Six4F6:+:2:18<br>TGATGACACc       | >Optix:Optix2B6:+:1:<br>49<br>AAGTGATA--   |
| >Vis:VisG2:-:5:14<br>ctcTGACAg-    | >Hth:hthC2:+:5:1<br>ttgTGACAg-          | >Six4:5Six4F7:+:2:19<br>TTTTGATACc       | >Optix:Optix2B7:+:1:<br>50<br>TTATGATA--   |
| >Vis:VisG3:-:5:15<br>ttaTGACAc-    | >Hth:hthC3:-:4:2<br>-ttTGACAta          | >Six4:5Six4F10:+:1:2<br>1<br>ATTTGAGAC-  | >Optix:Optix2B8:+:1:<br>51<br>TTCTGATA--   |
| >Vis:VisG4:-:6:16<br>cgtTGACA--    | >Hth:hthC4:-:2:3<br>cctTGACGt-          | >Six4:5Six4F11:+:1:2<br>2<br>TTGTGATAC-  | >So:SoE1:-:2:1<br>cTGTGATAC-               |
| >Vis:VisG5:-:5:17<br>aagTGACAa-    | >Hth:hthC5:-:3:4<br>ctgTGACAgg          | >Optix:11617C4:+:1:3<br>AAGTGATA--       | >So:SoE2:+:4:2<br>cGATGATA--               |
| >Vis:VisG6:+:4:18<br>-gaTGACAag    | >Hth:hthC6:+:4:5<br>ctgTGACGt-          | >Optix:11617C6:+:1:5<br>ATGTGATA--       | >So:SoE3:-:3:3<br>tATTGATAAct              |
| >Vis:VisG7:-:6:19<br>tttTGACA--    | >Hth:hthC8:-:1:6<br>-gaTGACA--          | >Six4:5Six4F11:+:1:2<br>2<br>TAGCGATG-   | >So:SoE5:-:3:5<br>gAATGATAAct              |
| >Vis:VisG8:-:6:20<br>aagTGACA--    | >Hth:hthC9:-:4:7<br>-gcTGACAgT          | >Optix:11617C8:+:1:7<br>TTGCGATA--       | >So:SoE6:+:4:6<br>aAATGATA--               |
| >Vis:VisG9:+:3:21<br>gTTTGACAgc    | >Hth:hthC10:+:6:8<br>accTGACG-          | >Optix:11617C9:-:1:8<br>TAGCGATG-        | >So:SoE7:-:2:7<br>tTGTGATAc-               |
| >Vis:VisG10:+:4:22<br>-ttTGACAgT   | >Hth:hthC11:+:5:9<br>cgaTGACAgc         | >Optix:11617C11:+:1:<br>10<br>TAGTGATA-- | >So:SoE8:-:2:8<br>aTCTGATAC-               |
| >Vis:VisG11:+:4:23<br>-agTGACAgc   | >Hth:hthC12:-:1:10<br>gTTTGACA--        | >Optix:11617D8:+:1:1<br>7<br>AAATGATA--  | >So:SoE9:+:4:9<br>tAGTGATA--               |
| >Vis:VisG12:+:3:24<br>taaTGACAgc   | >Hth:hthD1:-:3:11<br>cagTGACAgg         | >Optix:11617D9:+:1:1<br>8<br>TAGTGATA--  | >So:SoE11:-:2:10<br>tTTTGATAc-             |
| >Vis:VisH2:-:5:26<br>agtTGACAt-    | >Hth:hthD2:-:4:12<br>-ttTGACAgc         | >Optix:11617D11:+:1:<br>20<br>TAGTGATA-- | >So:SoE12:+:4:11<br>gGATGATA--             |
| >Vis:VisH10:-:4:33<br>tccTGACAgT   | >Hth:hthD3:+:5:13<br>attTGACAt-         | >Optix:11617D12:+:1:<br>21<br>AGATGATA-- | >So:SoF2:+:4:12<br>tGATGATA--              |
| >Achi:AchiG1:-:1:1<br>-CTTGACA--   | >Hth:hthD4:+:5:14<br>aggTGACAg-         | >Optix:OptixE8:+:1:2<br>9<br>AAGTGATA--  | >So:SoF4:-:2:14<br>aAATGATAc-              |
| >Achi:AchiG2:+:3:2<br>aTGTGACA--   | >Hth:hthD6:-:4:16<br>-aaTGACAgc         | >Optix:Optix2A2:+:1:<br>34<br>CCATGATA-- | >So:SoF5:-:2:15<br>gAGGGATAt-              |
| >Achi:AchiG3:-:4:3<br>-CATGACAgc   | >Hth:hthD9:-:1:19<br>caaTGACA--         | >Optix:Optix2A3:+:1:<br>35<br>ATGTGATA-- | >So:SoF7:-:2:17<br>aAATGATAc-              |
| >Achi:AchiG4:+:4:4<br>aTCTGACA--   | >Hth:hthD11:+:6:21<br>tcgTGACA--        | >Optix:Optix2A4:+:1:<br>36<br>AGCTGATA-- | >So:SoF9:+:4:19<br>gCATGAGA--              |
| >Achi:AchiG5:+:3:5<br>gCATGACAg-   | >Six4:5Six4E1:+:1:1<br>ATTTGATAC-       | >Optix:Optix2A5:+:1:<br>37<br>ATCTGATA-- | >So:SoE11:-:2:21<br>aAGTGATAC-             |
| >Achi:AchiG6:+:3:6<br>gTTTGACAt-   | >Six4:5Six4E2:+:1:2<br>CTTTGAGAC-       | >Optix:Optix2A6:+:1:<br>38<br>ATCTGATA-- | >So:SoE12:+:4:22<br>tCGTGATA--             |
| >Achi:AchiG8:-:4:8<br>-TATGACAgg   | >Six4:5Six4E3:+:1:3<br>ATTTGATAC-       | >Optix:Optix2A6:+:1:<br>38<br>ATCTGATA-- | >So:SoE22:+:4:23<br>tATTGATA--             |
| >Achi:AchiG9:-:3:9<br>tTTTGACAAc   | >Six4:5Six4E4:+:2:4<br>ATCTGACACc       | >Optix:Optix2A6:+:1:<br>38<br>ATCTGATA-- | >So:SoE23:-:3:24<br>cAGTGATAtg             |
| >Achi:AchiG10:+:4:10<br>aTCTGACA-- | >Six4:5Six4E5:+:1:5<br>AAATGAGAC-       | >Optix:Optix2A6:+:1:<br>38<br>ATCTGATA-- | >So:SoE24:+:4:25<br>gCATGATA--             |
| >Achi:AchiH1:-:2:11<br>aTTTGATAt-  | >Six4:5Six4E6:+:2:6<br>TCTTGATACc       | >Optix:Optix2A6:+:1:<br>38<br>ATCTGATA-- | >So:SoE25:-:3:26                           |
| >Achi:AchiH2:-:4:12<br>-TCTGACAgc  | >Six4:5Six4E8:+:1:8<br>AGATGATAC-       |                                          |                                            |
| >Achi:AchiH3:+:3:13<br>aAATGACA--  | >Six4:5Six4E9:+:1:9<br>TTTTGAGAA-       |                                          |                                            |
| >Achi:AchiH4:-:4:14<br>-ACTGACAgA  | >Six4:5Six4E10:+:2:1<br>0               |                                          |                                            |
| >Achi:AchiH6:-:3:16<br>tTTTGACAgc  |                                         |                                          |                                            |

```

gTGTGATAcc
>So:So2E6::+4:27
gGATGATA--
>So:So2E7::+4:28
cAGTGATA--
>So:So2E9::+3:30
tTGTGATAtg
>So:So2E10::+4:31
aCATGATA--
>So:So2E11::+4:32
tGATGATA--
>So:So2E12::+4:33
cAATGATA--
>Exd:ExdE1::+1:1
GTTTGACAt-
>Exd:ExdE3::+1:3
CTTTGACAt-
>Exd:ExdE5::+2:5
TTTTGACA--
>Exd:ExdE6::+2:6
ATTTGACA--
>Exd:ExdE7::+1:7
CTTTGATGa-
>Exd:ExdE8::+1:8
GATTGATGa-
>Exd:ExdE9::+2:9
AGTTGACA--
>Exd:ExdE10::+1:10
TTTTGACGa-
>Exd:ExdE12::+2:12
TTTTGACA--
>Exd:ExdF1::+1:13
AGTTGACAt-
>Exd:ExdF2::+1:14
TTTTGATGg-
>Exd:ExdF3::+1:15
CTTTGATGa-
>Exd:ExdF4::+2:16
ATTTGACA--
>Exd:ExdF5::+2:17
GTTTGACA--
>Exd:ExdF6::+1:18
GTTTGATGa-
>Exd:ExdF7::+2:19
TTTTGACA--
>Exd:ExdF9::+2:20
CTTTGACA--
>onecut:5onectG1::+4
:1
agCTGATTA-
>onecut:5onectG2:-
:3:2
-cTTGATTTc
>onecut:5onectG3:-
:2:3
ccTTGATTGc
>onecut:5onectG4:-
:2:4
taTTGATTAA
>onecut:5onectG8::+4
:8
ctATGATTA-
>onecut:5onectG10:-
:2:9
taTTGATTAA
>onecut:5onectG11:-
:3:10
-aTTGATTTg
>onecut:5onectG12:-
:3:11
-tCTGATTGa
>onecut:5onectH1::+4
:12
agTTGATTG-
>onecut:5onectH2:-
:3:13
-aTTGATTTg
>onecut:5onectH4:-
:3:15
-cTTGATTTg
>onecut:5onectH5::+5
:16
tcTTGATTT-
>onecut:5onectH7:-
:3:18
-gTTGATTTg
>onecut:5onectH10:-
:3:21
-tTTGATTGg
>onecut:5onectH11:-
:2:22
cgTTGATTAg
>Vnd:VndE2::+1:1
TCTCAAGTG-
>Vnd:VndE3::+1:2
TCTCAAGTA-
>Vnd:VndE5::+1:3
ATTGAAGTA-
>Vnd:VndE7::+1:4
GGTCAAGTA-
>Vnd:VndE8::+1:5
TCTCAAGTA-
>Vnd:VndE9::+1:6
TCTCAAGTG-
>Vnd:VndE10::+1:7
TTTTAAGTA-
>Vnd:VndE11::+1:8
TCTCAAGTG-
>Vnd:VndE12::+1:9
ATTGAAGTA-
>Vnd:VndF1::+1:10
GTTCAAGAG-
>Vnd:VndF2::+1:11
TTTCAAGTG-
>Vnd:VndF4::+1:13
TCTTAAGTA-
>Vnd:VndF5::+1:14
TATCAAGAG-
>Vnd:VndF6::+1:15
TCTCAAGTA-
>Vnd:VndF7::+1:16
ACTCAAGTG-
>Vnd:VndF8::+1:17
TTTCAAGTG-
>Vnd:VndF9::+1:18
TTTCAAGTA-
>Vnd:VndF10::+1:19
TTTTCAAGTG-
>Vnd:VndF12::+1:21
ATTCAAGTG-
>Tin:TinA2:-:3:1
gCTCAAGTA-
>Tin:TinA3::+3:2
-GTCAAGTAc
>Tin:TinA4::+2:3
cGTCAAGTGg
>Tin:TinA5:-:3:4
tCTCAAGTG-
>Tin:TinA6::+2:5
aTTCAAGTGg
>Tin:TinA7::+3:6
-GTCAAGTGc
>Tin:TinA8::+3:7
-CTTAAGTAc
>Tin:TinA9::+3:8
-CTTAAGTGg
>Tin:TinA10::+3:9
-TTTAAGTGg
>Tin:TinA11::+2:10
cCACAAGTGg
>Tin:TinB1::+3:11
-CTCAAGTGg
>Tin:TinB3::+3:12
-CTTAAGTGt
>Tin:TinB4::+2:13
-TTCAAGTGg
>Tin:TinB5::+3:14
-CTCAAGTGg
>Tin:TinB6::+3:15
-CTCAAGTGc
>Tin:TinB9::+3:18
-TTGAAGTGg
>Bap:BapA2:-:1:1
GCTTAAGTGg
>Bap:BapA3:-:1:2
TCTTAAGTGg
>Bap:BapA12:-:1:10
AGTTAAGTGg
>Bap:BapB1:-:1:11
GTTTAAGTGg
>Bap:BapB5:-:1:14
TGTTAAGTGg
>Bap:BapB6:-:1:15
TCTTAAGTGg
>Bap:BapB7:-:1:16
ACTTAAGTAc
>Bap:BapB9:-:1:18
TGTTAAGTGg
>Bap:BapB11:-:1:20
CGTTAAGTGg
>Bap:Bap2C1::+1:21
CTTTAAGTGt
>Bap:Bap2C2:-:1:22
ACTTAAGTAc
>Bap:Bap2C3:-:1:23
TTTTAAGTGt
>Bap:Bap2C4:-:1:24
CTGTAAGTGt
>Bap:Bap2C6:-:1:26
GCTTAAGTGc
>Bap:Bap2C7:-:1:27
ACTTAAGAAc
>Bap:Bap2C8:-:1:28
TCTTAAGTAc
>Bap:Bap2C9:-:1:29
ATTTAAGTGA
>Bap:Bap2C10:-:1:30
TATTAAGTAc
>Bap:Bap2C12:-:1:31
TTTTAAGTGA
>Bap:Bap2D2:-:1:32
CTTTAAGTAc
>Bap:Bap2D3:-:1:33
GGTTAAGTGg
>Bap:Bap2D10:-:1:38
ATTTAAGTGA
>Bap:Bap2D11:-:1:39
ACTTAAGTAc
>CG7056:CG7065A1::+3
:1
tTTTGATAA-
>CG7056:CG7065A4::+3
:2
cTTTAATAA-
>CG7056:CG7065A5::+3
:3
cTCTAATTA-
>CG7056:CG7065A6::+3
:4
gCTCAACAA-
>CG7056:CG7065A7::+3
:5
aATGAATTG-
>CG7056:CG7065A8::+3
:6
gGTTAATTA-
>CG7056:CG7065A9::+3
:7
aCTGAAGTA-
>CG7056:CG7065A10::+
:3:8
aTTTAATGA-
>CG7056:CG7065B1::+3
:10
aGTCAATTA-
>CG7056:CG7065B5::+3
:13
tTTCGATTA-
>CG7056:CG7065B6::+3
:14
aTTGTACTA-
>CG7056:CG7065B7::+3
:15
aACCAATAA-
>CG7056:CG7065B8::+3
:16
aTTGTACTA-
>CG7056:CG7065B9::+3
:17
tTTTAATAA-
>CG7056:CG7065B11::+
:2:19
cATTAATAAc
>Ubx:UbxC02::+3:1
aATTAATTA-
>Ubx:UbxC03::+3:2
aTTTTATTA-
>Ubx:UbxC04::+3:3
cTTTAATTA-
>Ubx:UbxC05::+3:4
cTTTAATTA-
>Ubx:UbxC06::+3:5
tATTAATTA-
>Ubx:UbxC07:-:3:6
-TTTTATTGc
>Ubx:UbxC08:-:3:7
-CTTAATTGc
>Ubx:UbxC11::+3:8
tATTAATGA-
>Ubx:UbxC12::+3:9
aTTTAATGG-
>Ubx:UbxD01::+2:10
tCTTAATGA-
>Ubx:UbxD02::+3:11
cGTTAATTA-
>Ubx:UbxD04::+3:12
cCTTAATTA-
>Ubx:UbxD05:-:3:13
-TTTAATTGt
>Ubx:UbxD06::+3:14
cGTTAATTA-
>Ubx:UbxD07:-:3:15
-TTTAATGGg
>Ubx:UbxD08::+3:16
cCTTAATGA-
>Ubx:UbxD09::+3:17
cCTTAATTA-
>Ubx:UbxD10::+3:18
tTTTATGA-
>Ubx:UbxD11:-:3:19
-GTTAATTAc
>Ubx:UbxD12:-:3:20
-TTTAATTGc
>C15:C15A1:-:3:1
aTTTAAGA-
>C15:C15A2::+3:2
-GTTAATTGg
>C15:C15A3::+3:3
-GTTAATGGg
>C15:C15A4::+3:4
-CTTAACGA
>C15:C15A5::+3:5
-CTTAACGA
>C15:C15A6:-:1:6
-GTTAACA-
>C15:C15A7::+1:7
cGTTAAACA-
>C15:C15A8:-:3:8
cGTTAACGA-
>C15:C15A9:-:3:9
tCTTAATTG-
>C15:C15A10:-:3:10
cGTTAATGA-
>C15:C15A11::+3:11
-CTTAATGA
>C15:C15A12:-:3:12
aTTTAATTG-
>C15:C15B1::+3:13
-GTTAATTGg
>C15:C15B2::+3:14
-AATAATGGg
>C15:C15B4::+3:15

```

```

-TTTAATTAg
>C15:C15B6:-:2:16
aTCTTATTAc
>C15:C15B8:+:3:18
-ATTAATTAg
>C15:C15B9:+:3:19
-TTTAAATAg
>C15:C15B11:+:3:21
-GTTAATTGc
>Mirr:MirrE1:+:1:1
TTGTAACA--
>Mirr:MirrE2:+:1:2
CAGTAACA--
>Mirr:MirrE3:+:1:3
TAAATAACA--
>Mirr:MirrE4:+:1:4
AGCAAACA--
>Mirr:MirrE5:+:1:5
CTATAACA--
>Mirr:MirrE6:+:1:6
TAATAACA--
>Mirr:MirrE7:+:1:7
TCGTGACA--
>Mirr:MirrE8:+:1:8
AAGTTACA--
>Mirr:MirrE9:+:1:9
AACTTACA--
>Mirr:MirrE10:+:1:10
AAAAAACA--
>Mirr:MirrE11:+:1:11
AGAAAACA--
>Mirr:MirrE12:+:1:12
AAAAAACA--
>Mirr:MirrF2:+:1:14
TACTTACA--
>Mirr:MirrF3:+:1:15
AGAAAACA--
>Mirr:MirrF4:+:1:16
GAAAAACA--
>Mirr:MirrF5:+:1:17
TGAAAACA--
>Mirr:MirrF6:+:1:18
GCCTGACA--
>Mirr:MirrF7:+:1:19
AATTTACA--
>Mirr:MirrF8:+:1:20
TCAAAAACA--
>Mirr:MirrF9:+:1:21
AGAAAACA--
>Mirr:MirrF10:+:1:22
ACAAAACA--
>Mirr:MirrF11:+:1:23
AAATAACA--
>Mirr:Mirr2C2:+:1:24
CAGAAAACA--
>Mirr:Mirr2C3:+:1:25
AACAAAACA--
>Mirr:Mirr2C4:+:1:26
GTACTACA--
>Mirr:Mirr2C5:+:1:27
TTCGAACA--
>Mirr:Mirr2C7:+:1:28
ATTTAACA--
>Mirr:Mirr2C8:+:1:29
TTGTAACA--
>Mirr:Mirr2C9:+:1:30
AGAAAACA--
>Mirr:Mirr2C11:+:1:3
2
TGAAAACA--
>Mirr:Mirr2C12:+:1:3
3
GATATACA--
>Mirr:Mirr2D1:+:1:34
CTCTTACA--
>Mirr:Mirr2D2:+:1:35
AAATTACA--
>Mirr:Mirr2D3:+:1:36
ATATAACA--
>Mirr:Mirr2D4:+:1:37
GTTAAACA--
>Mirr:Mirr2D5:+:1:38
CATAAACA--
>Mirr:Mirr2D7:+:1:40
TGAAAACA--
>Mirr:Mirr2D8:+:1:41
AGTTTACA--
>Mirr:Mirr2D9:+:1:42
AGAAAACA--
>Mirr:Mirr2D10:+:1:4
3
CAATAACA--
>Mirr:Mirr2D11:+:1:4
4
GAATAACA--
>Ara:AraG1:+:1:1
GTATTACA--
>Ara:AraG2:-:1:2
TAAGTACA--
>Ara:AraG4:+:1:3
AGTTTACA--
>Ara:AraG5:+:1:4
TAATTACA--
>Ara:AraG7:+:1:6
GGAAAACA--
>Ara:AraG8:+:1:7
GTATTACA--
>Ara:AraG11:+:1:9
GATATACA--
>Ara:AraG12:+:1:10
TTAGAACA--
>Ara:AraH3:+:1:11
GAATAACA--
>Ara:AraH5:+:1:12
ACATAACA--
>Ara:AraH6:+:1:13
TGTAACA--
>Ara:AraH7:-:1:14
GCTGAACA--
>Ara:AraH8:+:1:15
CAAAAACA--
>Ara:AraH9:+:1:16
ACATAACA--
>Ara:AraH10:+:1:17
CAAAAACA--
>Ara:AraH11:+:1:18
CTTTTACA--
>Ara:Ara2G1:+:1:19
CCCAAACA--
>Ara:Ara2G2:+:1:20
AATTAACA--
>Ara:Ara2G3:+:1:21
AAGTTACA--
>Ara:Ara2G4:+:1:22
AGAGAACA--
>Ara:Ara2G5:+:1:23
TATAAACA--
>Ara:Ara2G6:+:1:24
GAAAACA--
>Ara:Ara2G7:+:1:25
TAATAACA--
>Ara:Ara2G8:+:1:26
GTAGAACA--
>Ara:Ara2G10:+:1:27
TGAAAACA--
>Ara:Ara2G12:+:1:29
AATTAACA--
>Ara:Ara2H1:+:1:30
AAAAAACA--
>Ara:Ara2H2:+:1:31
CCAAAACA--
>Ara:Ara2H4:+:1:33
AAATTACA--
>Ara:Ara2H6:+:1:34
GAAAACA--
>Ara:Ara2H8:+:1:35
ACATTACA--
>Ara:Ara2H9:+:1:36
ACAAAACA--
>Ara:Ara2H10:+:1:37
AGAAAACA--
>Ara:Ara2H11:+:1:38
GAATTACA--
>Caup:CaupA2:+:1:1
TATTAACA--
>Caup:CaupA3:+:1:2
CTTTTACA--
>Caup:CaupA4:+:1:3
CAAAAACA--
>Caup:CaupA5:+:1:4
GTTGTACA--
>Caup:CaupA6:+:1:5
CTATTACA--
>Caup:CaupA7:+:1:6
CATTAACA--
>Caup:CaupA8:+:1:7
AGTTAACA--
>Caup:CaupA9:+:1:8
AAAGAACA--
>Caup:CaupA10:+:1:9
CTTTAACA--
>Caup:CaupA11:+:1:10
AAATGACA--
>Caup:CaupA12:+:1:11
CTAAAACA--
>Caup:CaupB1:+:1:12
TAATAACA--
>Caup:CaupB2:+:1:13
TTGTGACA--
>Caup:CaupB3:+:1:14
CGGAAACA--
>Caup:CaupB4:+:1:15
GGTTAACA--
>Caup:CaupB5:+:1:16
TAATAACA--
>Caup:CaupB9:+:1:19
CAGCAACA--
>Caup:CaupB10:+:1:20
CTGTAACA--
>Caup:CaupB11:+:1:21
AAAAAACA--
>CG11617:LagG2:+:3:1
TTTTTACA--
>CG11617:LagG3:+:3:2
ATTTAACA--
>CG11617:LagG5:+:3:3
TTTTTACA--
>CG11617:LagG6:+:3:4
TTTTTACA--
>CG11617:LagG8:+:3:5
GTTTAACA--
>CG11617:LagG9:+:3:6
AATTTACA--
>CG11617:LagG10:+:3:
7
ATTTAACA--
>CG11617:LagG11:+:3:
8
TTTTGACA--
>CG11617:LagG12:-
:2:9
TTTTGACAt-
>CG11617:LagH1:+:3:1
0
ATTTAACA--
>CG11617:LagH2:+:3:1
1
GTTTTTACA--
>CG11617:LagH3:+:3:1
2
ATTTAACA--
>CG11617:LagH4:+:3:1
3
TTTTTACA--
>CG11617:LagH5:+:1:1
4
GTTTAACA--
>CG11617:LagH6:+:3:1
5
AAATAACA--
>CG11617:LagH8:+:3:1
6
AGTTGACA--
>CG11617:LagH11:+:3:
18
TTTTTAAACA--
>Ct:5CtE1:+:1:1
TGCTAAAC--
>Ct:5CtE2:+:1:2
GTCTGAAC--
>Ct:5CtE3:+:1:3
GGTTAAAC--
>Ct:5CtE4:+:1:4
CGTTAATC--
>Ct:5CtE5:+:1:5
CATTGAAC--
>Ct:5CtE6:+:1:6
GATTAAC--
>Ct:5CtE7:+:1:7
TCTTGAAC--
>Ct:5CtE9:+:1:9
AGTTAAAC--
>Ct:5CtE10:+:1:10
TGCTAATC--
>Ct:5CtE11:+:1:11
GTTCAAAG--
>Ct:5CtE12:+:1:12
GCTCGAGC--
>Ct:5CtF1:+:1:13
TCCTGAAC--
>Ct:5CtF3:+:1:15
AATTGAAC--
>Ct:5CtF5:+:1:17
TTCTGAAC--
>Ct:5CtF6:+:1:18
CCTTGAAC--
>Ct:5CtF7:+:1:19
ACTTAAAC--
>Ct:5CtF8:+:1:20
GGTTGAAC--
>Ct:5CtF9:+:1:21
GCTAAAAC--
>Ct:5CtF10:+:1:22
TCTTGAAC--
>Ct:5CtF11:+:1:23
TCCTGAAC--
>CG15696:CG15696G1:-
:3:1
cCTTAATTA-
>CG15696:CG15696G2:+
:3:2
-TTTAATGAg
>CG15696:CG15696G3:+
:3:3
-GTCAATTGg
>CG15696:CG15696G5:-
:3:4
gTTTTTATTA-
>CG15696:CG15696G6:+
:2:5
cTCTAATTGg
>CG15696:CG15696G7:+
:2:6
tTGTAATTGg
>CG15696:CG15696G8:+
:3:7
-CTAGATTGa
>CG15696:CG15696G9:-
:1:8
-TCTAATTAg
>CG15696:CG15696G10:
+3:9
-TATTATTAa
>CG15696:CG15696G11:
+3:10
-CTCAATTGg
>CG15696:CG15696G12:
-:1:11
-GTTAATTAg
>CG15696:CG15696H2:+
:3:13
-GTTGATTGa
>CG15696:CG15696H3:+
:2:14

```

```

-CTTGATGGc
>CG15696:CG15696H4:++
:3:15
-CTTGATTGg
>CG15696:CG15696H5:++
:3:16
-TTAAATTGa
>CG15696:CG15696H7:++
:3:17
-ATTAATTAg
>CG15696:CG15696H8:++
:3:18
-GTTAATTGa
>CG15696:CG15696H9:++
:3:19
-GTTAATTAA
>CG15696:CG15696H10:
+:3:20
-CTAATTAg
>CG15696:CG15696H11:
+:3:21
-GTTAATTGg
>CG15696:156962G1:++
:3:22
-TGTAATTAc
>CG15696:156962G2:-
:3:23
gGGTAATTG-
>CG15696:156962G3:++
:3:24
-TTTGATTAt
>CG15696:156962G4:++
:3:25
-TATTATTAg
>CG15696:156962G5:-
:1:26
-CTAATTAc
>CG15696:156962G6:-
:3:27
cGCTAATTA-
>CG15696:156962G7:-
:1:28
-TTCAATTAc
>CG15696:156962G8:++
:3:29
-TTTTATTGc
>CG15696:156962G9:++
:3:30
-ATTGATTGa
>CG15696:156962G10:++
:3:31
-ATTAATTAg
>CG15696:156962G11:++
:3:32
-TTTTATTGg
>CG15696:156962G12:++
:2:33
-TTAAATTGg
>CG4328:5CG4328E1:++
:2:1
tGCTTATTGc
>CG4328:5CG4328E2:-
:3:2
aATATATTA-
>CG4328:5CG4328E3:++
:3:3
aCATTATGAa
>CG4328:5CG4328E4:-
:3:4
tCGTTATTG-
>CG4328:5CG4328E5:++
:2:5
tAGATATTGc
>CG4328:5CG4328E6:++
:4:6:mod
cctCAATTAT
>CG4328:5CG4328E7:++
:3:7
-ATTTATTGa
>CG4328:5CG4328E8:-
:3:8

cTATAATTA-
>CG4328:5CG4328E9:++
:3:9
-AATAATGAc
>CG4328:5CG4328E10:++
:1:10
tATTAATGG-
>CG4328:5CG4328E11:++
:3:11
-TTATATTAc
>CG4328:5CG4328E12:++
:3:12
-CTTAATTAg
>CG4328:5CG4328F1:++
:3:13
-TCTAATTGt
>CG4328:5CG4328F2:++
:2:14
gTATAATTGg
>CG4328:5CG4328F4:++
:3:15
-TGTAATTGg
>CG4328:5CG4328F5:++
:3:16
-AATAATTAA
>CG4328:5CG4328F6:++
:3:17
-ATATATTGc
>CG4328:5CG4328F7:++
:3:18
-CTATATTGc
>CG4328:5CG4328F9:++
:2:19
cGATAATTAA
>CG4328:5CG4328F10:++
:2:20
tCATTATTGa
>CG4328:5CG4328F11:++
:3:21
-AATAATTAA
>CG4328:5CG4328A1:++
:3:22
-AATTATGAg
>CG4328:5CG4328A2:++
:3:23
-TATTATTGa
>CG4328:5CG4328A3:-
:3:24
tATTTATTA-
>CG4328:5CG4328A5:++
:3:25
-ATTTATTAa
>CG4328:5CG4328A6:-
:2:26
cGTATATGAa
>CG4328:5CG4328A7:++
:2:27
aATTTATTGc
>CG4328:5CG4328A8:++
:2:28
tGATAATTGa
>CG4328:5CG4328A10:
-:2:29
tTAATATGAg
>CG4328:5CG4328A11:
+:2:30
cTTTAATTGc
>CG12361:CG12361A1:++
:3:1
tGTTTATGA-
>CG12361:CG12361A2:++
:3:2
tATAAATTA-
>CG12361:CG12361A4:++
:3:4
aATTGATGA-
>CG12361:CG12361A5:-
:1:5
aTTAAATGA-
>CG12361:CG12361A6:++
:3:6

cCTTAATGA-
>CG12361:CG12361A7:-
:2:7
gGTTTATGGg
>CG12361:CG12361A8:-
:2:8
aTTTATCac
>CG12361:CG12361A9:-
:3:9
-TTAAATGAc
>CG12361:CG12361A10:
+:3:10
-CTTAATGc
>CG12361:CG12361A11:
-:2:11
tTTTATCac
>CG12361:CG12361A12:
+:3:12
gTATTATTA-
>CG12361:CG12361B1:++
:3:13
gTATTATTA-
>CG12361:CG12361B2:-
:2:14
cTTTGATTAc
>CG12361:CG12361B3:-
:2:15
cGTTTATTAg
>CG12361:CG12361B4:-
:2:16
aTTTATGg
>CG12361:CG12361B5:-
:2:17
tTTAATTAc
>Cad:CadE1:-:3:1
cACAAATTA-
>Cad:CadE2:++:2:2
tGTTGATTAg
>Cad:CadE3:++:2:3
aAGTTATTAc
>Cad:CadE4:-:3:4
aATTAATAG-
>Cad:CadE5:-:3:5
cTTAAATGA-
>Cad:CadE6:-:4:6
gATTTATTT-
>Cad:CadE8:++:2:7
aTTTTATAAg
>Cad:CadE9:-:3:8
cAGTAATTA-
>Cad:CadE11:++:3:10
-CTAATGc
>Cad:CadE12:++:2:11
-TTTTATTAg
>Cad:CadF1:-:3:12
cCGTAATTA-
>Cad:CadF2:++:2:13
cATTTATTGg
>Cad:CadF3:++:2:14
cTTTAATGGc
>Cad:CadF4:-:3:15
gTTTAATAA-
>Cad:CadF5:-:3:16
tATTTATTA-
>Cad:CadF6:-:3:17
aTTTTATTA-
>Cad:CadF7:++:2:18
tGTTTATTGc
>Cad:CadF8:++:3:19
-TTTTATTGa
>Cad:CadF9:++:2:20
gTTTTATGat
>Cad:CadF11:++:2:22
aCTTTATTAc
>Cad:Cad2E1:++:2:23
cTTTATTGg
>Cad:Cad2E2:-:3:24
cATTATTA-
>Cad:Cad2E3:++:3:25
-ATTTATTAg
>Cad:Cad2E4:-:3:26

tATTTATTA-
>Cad:Cad2E7:-:3:28
cTCTAATTG-
>Cad:Cad2E8:++:2:29
aGTTTATTGg
>Cad:Cad2E9:++:2:30
tAATGATTGc
>Cad:Cad2E10:-:3:31
cTTAAATTA-
>Cad:Cad2F1:-:3:34
tTCTAATTA-
>Cad:Cad2F2:++:2:35
tGTTTATGAg
>Cad:Cad2F3:-:3:36
gATTTATAA-
>Cad:Cad2F4:-:3:37
cCATAATTA-
>Cad:Cad2F5:++:2:38
tTTTATTGc
>Cad:Cad2F6:-:3:39
tTTTTATTG-
>Cad:Cad2F7:++:2:40
aATTTATGGg
>Cad:Cad2F9:-:3:41
tTTTTATGA-
>Cad:Cad2F10:++:2:42
aTTATATGGg
>Cad:Cad2F11:++:2:43
tTTTTATTGc
>H2:H20C1:-:4:1:mod
tttTTATATA
>H2:H20C2:++:4:2
tcTTAATGA-
>H2:H20C3:++:3:3
acATTATTGa
>H2:H20C4:++:3:4
ggTTAATGAt
>H2:H20C5:++:3:5
taGATATTAc
>H2:H20C7:++:3:6
ccTTTATGGg
>H2:H20C8:++:3:7
cgTTGATTAA
>H2:H20C9:-:4:8:mod
agtCAATAAA
>H2:H20C10:++:3:9
gaTTAATTAt
>H2:H20C11:-
:4:10:mod
ggaTAATTAA
>H2:H20C12:++:3:11
ggGTAATTAg
>H2:H20D1:++:3:12
ctATTATTAa
>H2:H20D2:++:3:13
tgaATATTGa
>H2:H20D3:++:3:14
gcTTAATTGa
>H2:H20D4:-:4:15:mod
agaTAATAAT
>H2:H20D5:-:4:16:mod
ctgTAATAAA
>H2:H20D6:-:4:17
accTCATAAT
>H2:H20D7:++:3:18
aaTTTATTAA
>H2:H20D8:-:4:19:mod
atcTAATTAA
>H2:H20D9:-:4:20:mod
tgcTAATAAA
>H2:H20D10:++:3:21
cgTTTATTAA
>H2:H20D11:++:3:22
atTTTATGAg
>H2:5H202H2:++:3:23
caTTTATTGg
>H2:5H202H3:++:3:24
tgTTTATGAa
>H2:5H202H4:-
:4:25:mod
cgtTAATAAA

```

```

>H2:5H202H5:-:3:26
-cTTTTTGGC
>H2:5H202H6:+:4:27
atTTTATTA-
>H2:5H202H7:+:3:28
ctTTAATGAg
>H2:5H202H8:-:1:29
ttATTATGG-
>H2:5H202H9:-
:4:30:mod
catTAATAAAA
>H2:5H202H10:+:3:31
agGTAATTAc
>H2:5H202H11:+:3:32
gtTTAATGAc
>AbdB:abdb2:+:2:1
GGTTTATAG-
>AbdB:abdb3:+:1:2
GTTTTATTGt
>AbdB:abdb4:+:2:3
TTTTTATGG-
>AbdB:abdb5:+:2:4
GATTAATGG-
>AbdB:abdb6:+:2:5
GCTTTATGT-
>AbdB:abdb7:+:1:6
GGTTTACAAc
>AbdB:abdb8:+:2:7
GTTTAATGT-
>AbdB:abdb10:+:2:8
GATTTATGT-
>AbdB:abdb11:+:2:9
ATATTATGA-
>AbdB:abdb12:+:2:10
CATTTATTA-
>AbdB:abdb13:+:1:11
TTTTTATAAc
>AbdB:abdb14:+:2:12
TATTAATTA-
>AbdB:abdb15:+:1:13
GTTTTATGA-
>AbdB:abdb17:+:2:14
GTTTTATGG-
>AbdB:abdb18:+:2:15
CTTTAACGA-
>AbdB:abdb19:+:2:16
CTTTTATTA-
>AbdB:abdb20:+:2:17
CTTTTACGA-
>AbdB:abdb21:+:2:18
GATTTATTA-
>AbdB:abdb22:+:2:19
GATTTATTA-
>AbdB:abdb23:+:2:20
CTTTAATTA-
>AbdB:abdb24:+:2:21
GTTTTATGA-
>Lim3:Lim3C1:-:3:1
cCCTGATTA-
>Lim3:Lim3C2:-:1:2
-ATTTATTAa
>Lim3:Lim3C3:-:3:3
gCTTAATCA-
>Lim3:Lim3C4:+:2:4
GAATAATTAc
>Lim3:Lim3C5:+:2:5
tAATGATTAT
>Lim3:Lim3C7:-:3:6
aACAAATTA-
>Lim3:Lim3C8:+:3:7
-TCTGATGAa
>Lim3:Lim3C10:+:2:8
tAAAAATTAa
>Lim3:Lim3C11:+:3:9
-CTAAATGAa
>Lim3:Lim3C12:+:3:10
-ATAAATTAg
>Lim3:Lim3D1:+:3:11
-TTTAATGAa
>Lim3:Lim3D3:+:2:13
aTCTAATGAg
>Lim3:Lim3D4:+:1:14
-GGTAATTG-
>Lim3:Lim3D5:+:3:15
-CTTAATTGa
>Lim3:Lim3D6:+:3:16
-TGTAATTGa
>Lim3:Lim3D7:+:2:17
tCTTAATTGa
>Lim3:Lim3D8:-:1:18
-ACTAATTAA
>Lim3:Lim3D9:-:1:19
-ATTAATCAa
>Lim3:Lim3D10:+:1:20
ggCTAATTA-
>Lim3:Lim3D11:+:2:21
aTCTAATTAg
>Awh:AwhC1:-:2:1
atTTGATTAc
>Awh:AwhC2:-:2:2
ggCTGATTGg
>Awh:AwhC3:-:3:3
-tTTAATGAa
>Awh:AwhC4:+:1:4
--CTGATTAc
>Awh:AwhC5:+:4:5
atTTGATTAc
>Awh:AwhC7:-:2:7
aaTTAAGTAG
>Awh:AwhC8:+:1:8
--CTAATTAc
>Awh:AwhC9:+:1:9
--ATAATTAT
>Awh:AwhC10:-:2:10
taTTAATGAa
>Awh:AwhC12:+:4:12
acTTGATTA-
>Awh:AwhD1:-:2:13
cgCTAATGAg
>Awh:AwhD2:+:4:14
gtCTAATTA-
>Awh:AwhD3:-:2:15
acCTAATTAc
>Awh:AwhD5:+:4:16
caCTAATTA-
>Awh:AwhD6:-:2:17
ctTTAATTAc
>Awh:AwhD7:+:4:18
ttTTAATTA-
>Awh:AwhD8:-:1:19
cgCTAATTG-
>Awh:AwhD9:+:4:20
agTTAATTA-
>Awh:AwhD10:+:4:21
taCTAATGA-
>Awh:AwhD11:+:4:22
acCTAATGA-
>Awh:Awh2A1:+:4:23
ccTTAATTT-
>Awh:Awh2A2:-:2:24
atTTGATTAg
>Awh:Awh2A3:+:1:25
--TTAATTAT
>Awh:Awh2A4:+:4:26
ttTTGATTA-
>Awh:Awh2A8:+:4:27
ccTAAATGA-
>Awh:Awh2A9:-:3:28
-tTTAATTAg
>Awh:Awh2A10:-:2:29
tgCTAATTGg
>Awh:Awh2A11:+:2:30
-cATAATTA-
>Awh:Awh2A12:+:1:31
--TTAATTAT
>Awh:Awh2B1:+:4:32
agTTAATTA-
>Awh:Awh2B2:+:4:33
agATAATTA-
>Awh:Awh2B3:-:2:34
-cTTAATTAT
>Awh:Awh2B4:+:4:35
aaCTAATTA-
>Awh:Awh2B5:+:4:36
caCTAATTT-
>Awh:Awh2B6:+:4:37
tcCTAATTA-
>Awh:Awh2B7:-:3:38
-tTTAATTAG
>Awh:Awh2B8:+:4:39
taTTAATTA-
>Awh:Awh2B9:+:4:40
ccCTAATGA-
>Awh:Awh2B10:+:4:41
agTTAATGA-
>Awh:Awh2B11:+:4:42
ctCTAATTTG-
>Dll:D11C1:-:3:1
--tTAATTGT
>Dll:D11C2:-:5:2:mod
TGATAATGga
>Dll:D11C3:-:2:3
-tgTAATAGC
>Dll:D11C4:-:2:4
-gtTAATTTc
>Dll:D11C5:+:3:5
-taTAATTTT
>Dll:D11C6:-:2:6
-ccTAATTTG
>Dll:D11C7:-:2:7
-ttTAATGGC
>Dll:D11C8:-:2:8
-acAAATTTG
>Dll:D11C9:-:3:9
--aTAATTAC
>Dll:D11C10:-:4:10
--TAATTAC
>Dll:D11C11:-:4:11
--TAATTAC
>Dll:D11C12:-:2:12
-tcTAATGAT
>Dll:D11D1:-:2:13
-ctTAATAAC
>Dll:D11D2:+:3:14
-caTAATTTT
>Dll:D11D3:+:2:15
--cTGATAGG
>Dll:D11D4:+:4:16
ggTAAATTAC
>Dll:D11D5:-:2:17
-tcTAATGTC
>Dll:D11D6:-:2:18
-taTAATGTC
>Dll:D11D7:-:2:19
-cgTAATTTG
>Dll:D11D8:-:4:20
--TAATTAT
>Dll:D11D9:+:3:21
-agTAATTAC
>Dll:D11D10:+:2:22
--cTAATTAC
>Dll:D11D11:-:4:23
--TAATTAG
>CG4136:5CG4136G1:+:
3:1
agCTAATTA-
>CG4136:5CG4136G2:-
:3:2
-gTTAATTTa
>CG4136:5CG4136G3:-
:3:3
-cTTAATAGa
>CG4136:5CG4136G4:-
:3:4
-gCTAATTAT
>CG4136:5CG4136G5:-
:3:5
-cTTAATTAG
>CG4136:5CG4136G6:+:
3:6
gcCTAATTTG-
>CG4136:5CG4136G7:+:
4:7
aaTTAATGA-
>CG4136:5CG4136G8:+:
4:8
cgATAATTA-
>CG4136:5CG4136G9:-
:3:9
-tTTAATTAGg
>CG4136:5CG4136G10:-
:3:10
-cCTAATTAc
>CG4136:5CG4136G11:-
:3:11
-cCTAATGAg
>CG4136:5CG4136G12:-
:3:12
-gTTAATGAg
>CG4136:5CG4136H1:+:
4:13
taCTAATTTG-
>CG4136:5CG4136H2:+:
4:14
aaCTAATTA-
>CG4136:5CG4136H3:+:
2:15
-cTTAATTAc
>CG4136:5CG4136H4:-
:4:16
--TTAATTAT
>CG4136:5CG4136H5:+:
3:17
gcTTAATTTG-
>CG4136:5CG4136H6:+:
4:18
ctCTAATTA-
>CG4136:5CG4136H7:+:
4:19
gtTTAATTA-
>CG4136:5CG4136H9:-
:3:21
-tGTAAATGt
>CG4136:5CG4136H10:-
:3:22
-tTTAATTAAa
>CG4136:5CG4136H11:+:
2:23
-cTTAATTAT
>Al:AlE5:+:3:2
--tTAATTAA
>Al:AlE2:-:3:1
-gcTAATTAA
>Al:AlE6:-:4:3
tgcTAATTAA
>Al:AlE7:-:4:4
gcaTAATTAA
>Al:AlE8:-:4:5
gacTAATTAA
>Al:AlE9:+:3:6
--tTAATTAA
>Al:AlE10:-:4:7
ttcTAATTAA
>Al:AlE11:-:3:8
-taTAATTAA
>Al:AlE12:-:4:9
tgcTAATTAA
>Al:AlF2:-:4:11
gacTAATTAA
>Al:AlF3:-:4:12
cgcTAATTGA
>Al:AlF4:-:4:13
tcaTAATTAA
>Al:AlF5:-:4:14
cgcTAATTGG
>Al:AlF6:-:4:15
accTAATTAA
>Al:AlF7:-:1:16
--TAATTAA
>Al:AlF8:+:3:17
--gTAATTAG
>Al:AlF9:-:4:18
gtcTAATTAA
>Al:AlF10:-:4:19

```

Cell, Volume 133

ggcTAATTAA  
>Al:AlF11:-:4:20  
cccTAATTGA  
>Al:AlF12:-:3:21  
-gtTAATTAA  
>CG11294:CG11294A1:+  
:2:1  
-cTTAATTAt  
>CG11294:CG11294A3:+  
:2:2  
-tTTAATTAG  
>CG11294:CG11294A9:+  
:2:4  
-gTCAATTAG  
>CG11294:CG11294A11:  
+ :4:6  
aaCTAATTA-  
>CG11294:CG11294A12:  
- :1:7  
-tCTAATTA-  
>CG11294:CG11294B1:-  
:2:8  
taTTAATTAG  
>CG11294:CG11294B2:-  
:2:9  
acCTAATTAG  
>CG11294:CG11294B3:-  
:4:10  
--TTAATTAG  
>CG11294:CG11294B4:-  
:3:11  
-aTTAATTAG  
>CG11294:CG11294B5:+  
:2:12  
-aTCAATTAA  
>CG11294:CG11294B6:-  
:3:13  
-tTTAATTAG  
>CG11294:CG11294B7:+  
:2:14  
-aTTAATTAt  
>CG11294:CG11294B8:-  
:3:15  
-gTTAATTAG  
>CG11294:CG11294B9:-  
:3:16  
-aTTAATTAG  
>CG11294:CG11294B10:  
- :3:17  
-aTTAATTAG  
>Lim1:LimC10:+:2:9  
-gTTAATTAG  
>Lim1:LimC11:+:2:10  
-gTTAATTGA  
>Lim1:LimC12:+:1:11  
--TTAATTAG  
>Lim1:LimD1:+:3:12  
taCTAATTA-  
>Lim1:LimD2:+:2:13  
-aTTAATTAG  
>Lim1:LimD3:-:4:14  
--TTAATTAC  
>Lim1:LimD4:-:4:15  
--TTAATTAt  
>Lim1:LimD10:-:3:20  
-aTTAATTAG  
>Lim1:LimD11:-:4:21  
--TTAATTAA  
>Lim1:LimC2a:-:4:23  
--CTAATTAT  
>Lim1:LimC9a:-:4:28  
--TTAATTAG  
>Lim1:LimC10a:+:2:2  
9  
-gTTAATTAC  
>Lim1:LimD2a:-:4:32  
--TTAATTAG  
>Lim1:LimD4a:+:3:33  
aaTTAATTAT  
>Lim1:LimD6a:-:4:34  
--TTAATTAA  
>Lim1:LimD9a:-:3:35  
-tTTAATTAG  
>Lim1:LimD10a:-  
:4:36  
--TTAATTAG  
>Lim1:LimD11a:+:2:3  
7  
-tTTAATTAC  
>Hbn:HbnA1:+:1:1:mod  
-aaTAATTAA  
>Hbn:HbnA4:+:2:2  
-aGTAATTAC  
>Hbn:HbnA5:+:2:3:mod  
-tgTAATTGA  
>Hbn:HbnA6:+:2:4:mod  
-caTAATTGA  
>Hbn:HbnA7:+:3:5  
gaTTAATTAA  
>Hbn:HbnA8:-:4:6:mod  
ctcTAATTGA  
>Hbn:HbnA9:-:4:7:mod  
cctTAATTAA  
>Hbn:HbnA10:-:3:8  
-cTTAATTGg  
>Hbn:HbnB2:+:4:9  
gaCTAATTA-  
>Hbn:HbnB3:-:3:10  
-tTTAATTGt  
>Hbn:HbnB4:-:3:11  
-aTTAATTGt  
>Hbn:HbnB5:-:3:12  
-tTTAATTAA  
>Hbn:HbnB6:+:2:13  
-cTTAATTAT  
>Hbn:HbnB7:-:3:14  
-tTTAATTGg  
>Hbn:HbnB9:-:3:15  
-tTTAATTAA  
>Hbn:HbnB10:-:3:16  
-gTTAATTAG  
>Hbn:HbnB11:-:2:17  
-aTTAATTGg  
>Repo:RepoE2:-:3:1  
cTTTAATTA-  
>Repo:RepoE3:-:3:2  
gGGTAATTA-  
>Repo:RepoE4:-:2:3  
aGCTAATTA-  
>Repo:RepoE5:-:3:4  
tGTTAATTA-  
>Repo:RepoE7:+:2:6  
tCTTAATTGa  
>Repo:RepoE8:-:3:7  
tTTTAATTA-  
>Repo:RepoE9:+:2:8  
cATTAATTA-  
>Repo:Repo2A2:+:3:12  
-TTAAATTGc  
>Repo:Repo2A3:+:2:13  
tAGTAATTGg  
>Repo:Repo2A4:-:3:14  
cTATAATTA-  
>Repo:Repo2A5:+:1:15  
aTGTAATTA-  
>Repo:Repo2A6:+:3:16  
-TTAATTAG  
>Repo:Repo2A7:+:2:17  
tATTTATTGa  
>Repo:Repo2A8:-:3:18  
gCGTAATTA-  
>Repo:Repo2A9:-:3:19  
aGCTAATTA-  
>Repo:Repo2A11:-  
:3:20  
aTTTAATTG-  
>Repo:Repo2A12:-  
:3:21  
cATTAATTA-  
>Repo:Repo2B1:+:3:22  
-TTTAATTGa  
>Repo:Repo2B2:+:3:23  
-TTTAATTAG  
>Repo:Repo2B3:-:3:24  
gGCTAATTA-  
>Repo:Repo2B4:-:3:25  
cACTAATTA-  
>Repo:Repo2B5:-:3:26  
aCTTAATTA-  
>Repo:Repo2B6:-:3:27  
gTTTAATTA-  
>Repo:Repo2B7:-:3:28  
cATTAATTA-  
>Repo:Repo2B8:+:3:29  
-TTTAATTAA  
>Repo:Repo2B9:+:2:30  
tTTTAATTGg  
>Repo:Repo2B10:-  
:3:31  
aGTTAATTA-  
>Repo:Repo2B11:-  
:3:32  
aTTTAATTA-  
>CG32105:CG32105G2:+  
:2:1  
-TTTAATTAG  
>CG32105:CG32105G3:+  
:2:2  
-ACTAATTAA  
>CG32105:CG32105G4:+  
:1:3  
gTCTAATTGC  
>CG32105:CG32105G5:+  
:2:4  
-AATAATTAG  
>CG32105:CG32105G6:+  
:1:5  
cATTAATTGC  
>CG32105:CG32105G7:+  
:2:6  
-TCTAATTGG  
>CG32105:CG32105G8:+  
:1:7  
gTTTATATTAA  
>CG32105:CG32105G9:+  
:2:8  
-TTTAATGAC  
>CG32105:CG32105G10:  
+ :1:9  
cTATAATTGA  
>CG32105:CG32105G12:  
+ :2:11  
-TTTAATTAA  
>CG32105:CG32105H1:+  
:2:12  
-TTTAATTAA  
>CG32105:CG32105H2:+  
:1:13  
tATTAATTAC  
>CG32105:CG32105H3:-  
:1:14  
-ATTAATTAG  
>CG32105:CG32105H4:+  
:1:15  
tCCAAATTAG  
>CG32105:CG32105H5:+  
:2:16  
-ATTAATTAG  
>CG32105:CG32105H7:+  
:2:18  
-ATTAATTAG  
>CG32105:CG32105H9:+  
:1:19  
aATTTAGTAG  
>CG32105:CG32105H10:  
+ :2:20  
-ATTAATTAG  
>CG32105:CG32105H11:  
- :1:21  
-TTTAATTAA  
>CG33980:CG33980A1:-  
:1:1  
-TTTAATTAC  
>CG33980:CG33980A2:+  
:1:2  
-CATAATTAG  
>CG33980:CG33980A4:+  
:1:4  
-GTTAATTAG  
>CG33980:CG33980A5:+  
:1:5  
-GTTAATTAG  
>CG33980:CG33980A6:+  
:1:6  
-GTTAATTGC  
>CG33980:CG33980A7:+  
:1:7  
-GTTAATTGG  
>CG33980:CG33980A8:+  
:1:8  
-TTTAATTAA  
>CG33980:CG33980A12:  
+ :1:12  
-GTTAATTGG  
>CG33980:CG33980B2:-  
:1:13  
-TCTAATTAG  
>CG33980:CG33980B4:+  
:1:15  
-TATAATTAG  
>CG33980:CG33980B6:+  
:1:17  
-TTTAATTAG  
>CG33980:CG33980B7:+  
:1:18  
-TCTAATTAG  
>CG33980:CG33980B10:  
+ :1:20  
-ATTAATTAG  
>Exex:ExexE1:-:3:1  
-tCTAATTAA  
>Exex:ExexE2:+:2:2:m  
od  
-ctTAATTGG  
>Exex:ExexE3:+:3:3  
ggGTAATTAA  
>Exex:ExexE4:+:4:4  
gaGTAATTA-  
>Exex:ExexE5:+:2:5  
-cTTAATTAt  
>Exex:ExexE6:+:4:6  
caGTAATTA-  
>Exex:ExexE7:+:4:7  
cgTTAATTA-  
>Exex:ExexE8:-:4:8  
--GTAATAAG  
>Exex:ExexE9:-:3:9  
-aGTAATTAG  
>Exex:ExexE10:+:4:10  
gtGTAATTA-  
>Exex:ExexE11:+:4:11  
ggCTAATTA-  
>Exex:ExexE12:+:4:12  
gaGTAATTA-  
>Exex:ExexF1:+:2:13  
-gGTAATTAG  
>Exex:ExexF2:-  
:4:14:mod  
ttcTAATTGA  
>Exex:ExexF3:-  
:4:15:mod  
agtTAATTAC  
>Exex:ExexF4:+:2:16  
-tGTAATTAA  
>Exex:ExexF5:-  
:4:17:mod  
actTAATCAC  
>Exex:ExexF6:+:2:18  
-tCTAATTAA  
>Exex:ExexF7:+:2:19  
-aCTAATTAG  
>Exex:ExexF8:+:4:20  
ggCTAATTA-  
>Exex:ExexF9:+:2:21

```

-ttTAATTGC
>Exex:ExexF10::+4:22
atGTAATTA-
>Exex:ExexF11::+3:23
cgCTAATTAa
>Rx:Rx2F2::+3:1
-GCTAATTAc
>Rx:Rx2F3::+3:2
tACTAATTA-
>Rx:Rx2F4::+3:3
tACTAATTA-
>Rx:Rx2F5::+2:4
gGTAATTAg
>Rx:Rx2F7::+1:6:mod
-gtTAATTGG
>Rx:Rx2F8::+1:7:mod
-ttTAATTGA
>Rx:Rx2F12::+1:10
-GCTAATTAa
>Rx:Rx2C1::+1:11
tCATAATTA-
>Rx:Rx2C2::+1:12
-ACTAATTAg
>Rx:Rx2C3::+3:13
-GTAAATTAa
>Rx:Rx2C5::+3:15
aCTTAATTA-
>Rx:Rx2C6::+2:16
cACTAATTGg
>Rx:Rx2C7::+1:17
-CCTAATTAT
>Rx:Rx2C8::+1:18:mod
tGTAATTA-
>Rx:Rx2C9::+1:19:mod
-atTAATTGA
>Rx:Rx2C10::+1:20:mod
-caTAATTGA
>Rx:Rx2C11::+1:21:mod
-gcTAATTGA
>Rx:Rx2D1::+1:23:mod
-ttTAATTGC
>Rx:Rx2D2::+1:24
-GCTAATTAg
>Rx:Rx2D3::+1:25
-AATAATTAg
>Rx:Rx2D4::+1:26:mod
-ctTAATTGG
>Rx:Rx2D5::+1:27
-GCTAATTAa
>Rx:Rx2D6::+1:28:mod
-ttTAATTGA
>Rx:Rx2D8::+1:29
-GCTAATTAa
>Rx:Rx2D9::+3:30
-GCTAATTAa
>Rx:Rx2D10::+1:31
-GCTAATTAa
>Rx:Rx2D11::+1:32:mod
-atTAATTGG
>Ro:RoG1::+3:1
-GGTAATTAc
>Ro:RoG2::+1:2:mod
-gcTAATTGC
>Ro:RoG3::+3:3
tACTAATGA-
>Ro:RoG4::+3:4
-TTTAATTAc
>Ro:RoG5::+1:5:mod
-ccTAATTGA
>Ro:RoG6::+3:6
tAATAATTA-
>Ro:RoG7::+2:7
cTTAATTA-
>Ro:RoG8::+3:8
tACTAATGA-
>Ro:RoG9::+3:9
cACTAATTA-
>Ro:RoG10::+3:10
tGCTAATTA-
>Ro:RoG11::+3:11
aGTTAATTAT
>Ro:RoG12::+3:12
tGTTAATTA-
>Ro:RoH1::+1:13:mod
-ttTAATTGA
>Ro:RoH2::+1:14
-ACTAATTAa
>Ro:RoH3::+2:15
tCGTAATGA-
>Ro:RoH4::+3:16
cGCTAATTA-
>Ro:RoH5::+1:17
-GCTAATTAa
>Ro:RoH6::+1:18
-GCTAATTAa
>Ro:RoH7::+1:19
-GCTAATTAa
>Ro:RoH8::+3:20
tCTTAATTA-
>Ro:RoH9::+1:21
-GCTAATTAa
>Ro:RoH10::+3:22
cGGTAATTA-
>Ro:RoH11::+1:23:mod
-ctTAATTGC
>Pph13:Pph13C1::+3:1
tAATAATTA-
>Pph13:Pph13C2::+3:2
tGATAATTG-
>Pph13:Pph13C3::+1:3
-TCTAATTa
>Pph13:Pph13C4::+3:4
cCATAATTA-
>Pph13:Pph13C5::+3:5
-ACTAATTCg
>Pph13:Pph13C6::+3:6
aTATAATTA-
>Pph13:Pph13C7::+3:7
aTTTAATTA-
>Pph13:Pph13C8::+3:8
-ACTAATCag
>Pph13:Pph13C9::+1:9
:mod
-caTAATTGT
>Pph13:Pph13C10::+1:10:mod
-agTAATTGG
>Pph13:Pph13C11::+3:11
11
tCCTAATTA-
>Pph13:Pph13C12::+1:12:mod
-ggTAATTGG
>Pph13:Pph13D1::+1:13
-AATAATTAg
>Pph13:Pph13D2::+1:14:mod
-gcTAATTGT
>Pph13:Pph13D3::+3:15
5
gCCTAATTA-
>Pph13:Pph13D4::+1:16
6
-AGTAATTAc
>Pph13:Pph13D5::+1:17:mod
7:mod
-ttTAATTGA
>Pph13:Pph13D6::+1:18
8
-ACTAATTat
>Pph13:Pph13D7::+3:19
-ATTAATTAa
>Pph13:Pph13D9::+1:20
1
-ACTAATTAa
>Pph13:Pph13D11::+1:21
22
-ATTAATTAa
>Inv:InvC1::+2:1
gGTTAATTAT
>Inv:InvC2::+1:2
-ACTAATTAa
>Inv:InvC3::+2:3
tGCTAATTAT
>Inv:InvC5::+3:4
cACTAATTA-
>Inv:InvC7::+3:6
-TATAATTAc
>Inv:InvC8::+1:7
-TCTAATTAa
>Inv:InvC11::+1:10
cTCTAATTA-
>Inv:InvC12::+3:11
-TTTAATTAg
>Inv:InvD1::+2:12
aTTTAATTGg
>Inv:InvD2::+2:13
cTCTAATTGa
>Inv:InvD3::+2:14
tTTTAATTGa
>Inv:InvD4::+2:15
tTCTAATTAg
>Inv:InvD5::+2:16
tACTAATTAc
>Inv:InvD7::+2:18
aACTAATTGg
>Inv:InvD8::+2:19
tTTTAATTGa
>Inv:InvD11::+3:22
-GTTAATTAc
>CG9876:CG9876A1::+2:1
tGCTAATTGt
>CG9876:CG9876A2::+1:2:mod
-cgTAATGAG
>CG9876:CG9876A3::+3:3
gACTAATTA-
>CG9876:CG9876A4::+3:4
tCGTAATTG-
>CG9876:CG9876A5::+1:5
-GTTAATTGa
>CG9876:CG9876A6::+1:6
-AGTTATTAa
>CG9876:CG9876A7::+2:7
cACTAATTGg
>CG9876:CG9876A8::+3:8
tATTAATTA-
>CG9876:CG9876A10::+1:10
-ACTTATTAa
>CG9876:CG9876B2::+2:11
cACTAATTGg
>CG9876:CG9876B3::+2:12
cAATAATTAg
>CG9876:CG9876B4::+1:13
-ACTAATTAg
>CG9876:CG9876B5::+1:14
-TTTAATTAa
>CG9876:CG9876B6::+1:15
-TTTAATTAc
>CG9876:CG9876B7::+3:16
-ATTAATTAa
>CG9876:CG9876B8::+1:17
-TCTAATTAT
>CG9876:CG9876B9::+1:18
-GCTAATTAa
>CG9876:CG9876B10::+1:19
-ACTAATTAa
>CG9876:CG9876B11::+1:20
-ATTAATTAT
>CG9876:CG9876B12::+3:21
-GATAATTGc
>En:eng1::+2:1
cGCTAATTAg
>En:eng2::+3:2
aTTTAATTA-
>En:eng3::+2:3
cACTAATGAg
>En:eng4::+3:4
gGGTAATTA-
>En:eng5::+2:5
tGATAATTGc
>En:eng7::+3:6
tGCTAATTA-
>En:eng8::+2:7
gGTTAATTGg
>En:eng9::+3:8
cGTTAATTA-
>En:eng10::+3:9
aGGTAATTA-
>En:eng11::+3:10
gGCTAATTA-
>En:eng12::+1:11
tTTTAATTG-
>En:eng13::+2:12
tTTTAATTGg
>En:eng14::+3:13
aACTAATTA-
>En:eng15::+3:14
tCTTAATTG-
>En:eng16::+3:15
cGATAATTG-
>En:eng17::+3:16
gACTAATTA-
>En:eng18::+2:17
tTTTAATTGg
>En:eng19::+3:18
-CTTAATTGa
>En:eng20::+3:19
cGTTAATGA-
>En:eng21::+1:20
-GCTAATTAa
>En:eng22::+2:21
gTTTAATTGg
>En:eng23::+2:22
-CTTAATTGa
>En:eng24::+3:23
gGCTAATTA-
>CG32532:CG32432G1::+3:1
-gCTAATTAc
>CG32532:CG32432G2::+2:2
tgATAATTGg
>CG32532:CG32432G3::+1:3
--TTAATTAT
>CG32532:CG32432G4::+3:4
-tTTAATTTg
>CG32532:CG32432G5::+4:5
agGTAATTA-
>CG32532:CG32432G6::+2:6
-tCTAATTAT
>CG32532:CG32432G7::+3:7
gcTTAATGA-
>CG32532:CG32432G8::+3:8

```

```

-gTAATTAc
>CG32532:CG32432G9:+
:2:9
taCTAATTGc
>CG32532:CG32432G10:
+2:10
atCTAATTGg
>CG32532:CG32432G11:
+3:11
-aTTAATTGg
>CG32532:CG32432G12:
+3:12
-cTTAATTAg
>CG32532:CG32432H1:+
:2:13
cgTTAATTGg
>CG32532:CG32432H2:+
:3:14
-cCTAATTGg
>CG32532:CG32432H3:+
:3:15
-tTTAATTAA
>CG32532:CG32432H4:+
:3:16
-aTTAATTGg
>CG32532:CG32432H5:-
:2:17
-tTTAATTAt
>CG32532:CG32432H6:-
:2:18
-gTTAATTAg
>CG32532:CG32432H7:+
:2:19
tcCTAATTGg
>CG32532:CG32432H8:+
:3:20
-aTTAATTGg
>CG32532:CG32432H9:+
:3:21
-cTTAATTGg
>CG32532:CG32432H10:
+3:22
-gTTAATTAA
>CG32532:CG32432H11:
-4:23
acATAATGA-
>Unpg:UnpgC1:-:3:1
-ACTAATGAc
>Unpg:UnpgC2:+:3:2
aCGTAATTA-
>Unpg:UnpgC3:+:2:3
cGCTAATTAg
>Unpg:UnpgC4:+:3:4
aGATAATTG-
>Unpg:UnpgC5:+:1:5
-CGTAATTAg
>Unpg:UnpgC6:-:2:6
gCGTAATTAg
>Unpg:UnpgC7:-:3:7
-CTTAATTGc
>Unpg:UnpgC8:-:2:8
-TTTAATGAg
>Unpg:UnpgC9:-:3:9
-TTTAATTGg
>Unpg:UnpgC10:-:2:10
cCTTAATTGc
>Unpg:UnpgC11:+:1:11
-ACTAATTAt
>Unpg:UnpgD1:+:3:12
gCCTAATTA-
>Unpg:UnpgD2:-:2:13
cGCTAATTAt
>Unpg:UnpgD3:-:2:14
-CTTAATTGg
>Unpg:UnpgD4:-:3:15
-CTTAATTGg
>Unpg:UnpgD5:-:3:16
-ATTAATTGg
>Unpg:UnpgD6:-:2:17
tCCAATTAg
>Unpg:UnpgD8:-:3:18
-ATTAATTAg
>Unpg:UnpgD9:+:1:19
-TGTAATTAt
>Unpg:UnpgD10:-:2:20
cCTTAATTAg
>Unpg:UnpgD11:-:2:21
tATTAATTAg
>PhdP:PhdPA1:+:2:1
-aTTAATTtG
>PhdP:PhdPA2:+:3:2
ggTTAATTac
>PhdP:PhdPA3:-:3:3
-gCTAATAgg
>PhdP:PhdPA4:+:2:4:m
od
-cctAATGAG
>PhdP:PhdPA8:+:4:6
gcATAATTt-
>PhdP:PhdPA9:+:4:7
taATAATTg-
>PhdP:PhdPA10:+:2:8
-cCTAATTgg
>PhdP:PhdPA11:+:4:9
aaATAATTa-
>PhdP:PhdPA12:+:4:10
gaTTAATTa-
>PhdP:PhdPB1:-:4:11
-gATAATTta
>PhdP:PhdPB2:-:4:12
-tTTTATTga
>PhdP:PhdPB3:+:5:13
cgCTAATTt-
>PhdP:PhdPB4:-:4:14
-cTTAATTcc
>PhdP:PhdPB5:+:1:15
--CTAATTat
>PhdP:PhdPB6:+:2:16
-cTTAATTat
>PhdP:PhdPB7:+:2:17
-tTTAATTaa
>PhdP:PhdPB10:+:4:18
acCTAATTa-
>CG7056:CG7056G1:+:3
:20
tATTAATTA-
>CG7056:CG7056G2:+:3
:21
tTTGAAGTA-
>CG7056:CG7056G3:+:3
:22
cCCTAATTG-
>CG7056:CG7056G4:+:2
:23
aATCAATTAc
>CG7056:CG7056G5:+:3
:24
tTTGAATTG-
>CG7056:CG7056G6:+:3
:25
aTTTAATTA-
>CG7056:CG7056G7:-
:3:26
-TCTAATTAc
>CG7056:CG7056G8:+:3
:27
tTTTAATAA-
>CG7056:CG7056G10:+:
2:28
aTCTTATTAc
>CG7056:CG7056G11:+:
3:29
gACCAATTG-
>CG7056:CG7056G12:+:
3:30
gACGAAGTA-
>Oc:OcA2:+:4:2
gcTTAAGCC-
>Oc:OcA3:+:3:3
cgATAATCCC
>Oc:OcA4:-:3:4
-tTTAAGCCc
-ATTAATCCt
>Oc:OcA5:-:3:5
-aATAATCCt
>Oc:OcA6:+:4:6
atATAATCC-
>Oc:OcA9:-:4:9
--CTAATCCg
>Oc:OcA10:-:2:10
ccTTAATCCt
>Oc:OcA11:-:3:11
-gTTAATCCtG
>Oc:OcB1:-:3:12
-aTTAATCCa
>Oc:OcB2:+:4:13
tcATAATCC-
>Oc:OcB3:-:3:14
-cGTAATCCt
>Oc:OcB4:-:3:15
-cTTAATCCg
>Oc:OcB5:-:3:16
-cTTAATCCa
>Oc:OcB6:-:3:17
-tATAATCCc
>Oc:OcB7:+:4:18
agTTAATCC-
>Oc:OcB8:-:3:19
-aCTAATCCa
>Oc:OcB9:-:2:20
-aTTAATCCt
>Oc:OcB10:-:3:21
-cTTAATCCg
>Oc:OcB11:-:3:22
-gTTAATCCg
>Bcd:bcd1:-:2:1
tGTTAATCCg
>Bcd:bcd2:+:3:2
-TCTAATCCa
>Bcd:bcd3:-:2:3
cGTTAATCTc
>Bcd:bcd4:-:3:4
gTTAATCC-
>Bcd:bcd5:-:3:5
cTATAATCC-
>Bcd:bcd6:-:2:6
tCTTAATCCc
>Bcd:bcd7:-:2:7
gCTTAATCCg
>Bcd:bcd8:-:3:8
gGTTAATCC-
>Bcd:bcd9:-:3:9
aGATAATCC-
>Bcd:bcd10:-:2:10
aGCTTATCC-
>Bcd:bcd11:-:3:11
ggGTTAATCC-
>Bcd:bcd13:-:2:12
tGTTAATCC-
>Bcd:bcd14:+:3:13
-TATAATCCc
>Bcd:bcd15:-:2:14
gCGTAATCCa
>Bcd:bcd16:+:1:15
gCTTAAGCC-
>Bcd:bcd17:-:1:16
-GGTTATCCg
>Bcd:bcd18:-:2:17
tGTTAATCCc
>Bcd:bcd20:-:3:18
gCTTAATCC-
>Bcd:bcd21:-:3:19
tACTAATCC-
>Bcd:bcd22:-:3:20
tCCTAATCC-
>Bcd:bcd23:-:2:21
gGTTAATCCg
>Bcd:bcd24:+:3:22
-TCTAATCCa
>Ptx1:PtxG1:+:4:1
atCTAATCC-
>Ptx1:PtxG2:+:2:2
-tTTAATCCc
>Ptx1:PtxG4:-:4:3
--CTAATCCt
>Ptx1:PtxG6:-:3:4
-aCTAATCCt
>Ptx1:PtxG7:+:2:5
-cTTAATCCt
>Ptx1:PtxG8:-:3:6
-gTTAATCCc
>Ptx1:PtxG9:-:3:7
-gTTAATCCc
>Ptx1:PtxG10:+:4:8
aaTTAATCC-
>Ptx1:PtxG11:+:4:9
ggCTAATCC-
>Ptx1:PtxG12:+:3:10
tcGTAATCCc
>Ptx1:PtxH1:+:2:11
-gCTAATCCt
>Ptx1:PtxH2:+:4:12
tcTTAATCC-
>Ptx1:PtxH4:+:3:14
cgTTAATCTc
>Ptx1:PtxH5:+:3:15
ccTTAATCCc
>Ptx1:PtxH6:+:3:16
cgTTAATCCc
>Ptx1:PtxH7:+:3:17
ggTTAATCCc
>Ptx1:PtxH8:+:3:18
tcTTAATCCc
>Ptx1:PtxH9:+:3:19
cgTTAATCCc
>Ptx1:PtxH10:+:3:20
cgTTAATCCc
>Ptx1:PtxH11:+:3:21
acTTAATCCc
>Gsc:GscA1:+:2:1
tCGTAATCCg
>Gsc:GscA2:-:3:2
aAGTAATCC-
>Gsc:GscA3:+:2:3
gACTAATCTt
>Gsc:GscA4:+:3:4
-AATAATCCt
>Gsc:GscA5:+:2:5
tACTAATCTt
>Gsc:GscA6:+:3:6
-GATAATCTg
>Gsc:GscA7:+:3:7
-AGTAATCCt
>Gsc:GscA8:+:3:8
-TTAATCCg
>Gsc:GscA9:-:3:9
tCGTAATCC-
>Gsc:GscA10:-:3:10
cGTTAATCT-
>Gsc:GscA11:+:3:11
-CATAATCCt
>Gsc:GscA12:-:3:12
cAATAATCC-
>Gsc:GscB1:-:3:13
cGTTAATCT-
>Gsc:GscB3:+:2:14
tGTTAATCCc
>Gsc:GscB4:+:3:15
-CTTAATCTc
>Gsc:GscB5:+:3:16
-CTTAATCCg
>Gsc:GscB6:+:3:17
-TTTAATCCg
>Gsc:GscB7:-:3:18
cCCTAATCC-
>Gsc:GscB8:+:2:19
tGTTAATCCc
>Gsc:GscB9:+:2:20
tCCTAATCCa
>Gsc:GscB10:+:3:21
-ACTAATCCa
>Gsc:GscB11:+:1:22
cATTAATCC-
>Oct:oct1:+:3:1
cGATAATGA-

```



```

>Oct:oct2:+:3:2      tATTAATGG-
gTTTAATGA-
>Oct:oct3:+:3:3      -CTTAATAGa
tTTTAATAA-
>Oct:oct4:+:3:4      >Tup:TupE6:-:3:6
aCATAATTT-          -TATAATGGt
>Oct:oct5:+:2:5      >Tup:TupE7:-:3:7
cTATAATTAg          -GATAATTaA
>Oct:oct6:+:3:6      >Tup:TupE9:-:3:9
aGATAATTT-          -GTTAAGTgG
>Oct:oct7:+:3:7      >Tup:TupE10:-:3:10
aTATAATAA-          -CATAATTGa
>Oct:oct8:+:3:8      >Tup:TupE11:+:3:11
cATTAATCA-          cCTTAATGG-
>Oct:oct10:-:3:9     >Tup:TupE12:+:3:12
-TTTAATCAc          cCTTAATGG-
>Oct:oct11:-:3:10   >Tup:TupF2:-:3:14
-CCTAATGAg          -CTTAATTGc
>Oct:oct13:+:3:11   >Tup:TupF4:-:3:15
aGCTAATTA-          -CTAAATGGa
>Oct:oct14:+:3:12   >Tup:TupF6:-:3:17
cATTAATTT-          -CTTAATGGa
>Oct:oct15:+:3:13   >Tup:TupF7:+:3:18
gTAAATGA-          cGATAAGTG-
>Oct:oct16:-:3:14   >Tup:TupF8:-:3:19
-TTTAATGAg          -CTTAATTGa
>Oct:oct17:+:3:15   >NK7:NK7E1:+:3:1
cCCTAATTA-          aTATAATGA-
>Oct:oct18:-:3:16   >NK7:NK7E2:+:3:2
-GTTAATGAg          aATTAAGTG-
>Oct:oct19:+:3:17   >NK7:NK7E3:+:3:3
tCATAATCA-          aATTAAGTG-
>Oct:oct20:+:3:18   >NK7:NK7E4:-:3:4
gTTTAATTG-          -TTTAAATAc
>Oct:oct21:+:3:19   >NK7:NK7E6:+:3:5
aGATAATTC-          aAATAATTA-
>Oct:oct22:+:3:20   >NK7:NK7E7:+:2:6
gTTTAATTT-          gAGTAAATGa
>Oct:oct23:+:3:21   >NK7:NK7E8:+:3:7
cTTTAATTT-          aACTAATTG-
>Oct:oct24:+:3:22   >NK7:NK7E10:-:3:8
tGATAATTA-          -GTTAAGTGg
>Bsh:BshE1:+:1:1    >NK7:NK7F1:+:3:10
-CCTAATGGG          aGCTAATTG-
>Bsh:BshE2:+:1:2    >NK7:NK7F4:+:3:13
-TTTAATCGA          cGCTAATGA-
>Bsh:BshE3:+:1:3    >NK7:NK7F6:-:1:15
-CCTAATGAC          tTTTAATTG-
>Bsh:BshE4:+:1:4    >NK7:NK7F7:+:3:16
-TGTAATTGG          cCTTAATAG-
>Bsh:BshE6:+:1:5    >NK7:NK7F8:-:3:17
-ATTAATTCG          -CTTAATTGc
>Bsh:BshE8:+:1:7    >NK7:NK7F9:-:3:18
-CCTAATGAT          -CTTAATTGg
>Bsh:BshE11:+:1:10  >NK7:NK7F10:+:3:19
-TTTAATCGA          gCTTAATTA-
>Bsh:BshE12:+:1:11  >NK7:NK7F11:+:3:20
-TCTAATCGA          gACTAATTA-
>Bsh:BshF1:+:1:12   >NK7:NK72A2:-:2:21
-TCTAATGAG          gTTTAATGAt
>Bsh:BshF4:+:1:14   >NK7:NK72A3:+:3:22
-TCTAATGAG          aCTTAAGTG-
>Bsh:BshF6:+:1:15   >NK7:NK72A5:-:3:24
-GTTAATTGC          -TTTAATGGa
>Bsh:BshF7:+:1:16   >NK7:NK72A6:-:3:25
-ATTAATTAG          -CTTAATAGc
>Bsh:BshF8:+:1:17   >NK7:NK72A7:-:3:26
-TTTAATCGA          -TATAATTGt
>Bsh:BshF9:+:1:18   >NK7:NK72A8:-:2:27
-CCTAACGAG          tTTTAATTaA
>Bsh:BshF10:+:1:19  >NK7:NK72A9:+:3:28
-TATAAATGG          aCATAATAG-
>Bsh:BshF11:+:1:20  >NK7:NK72A10:+:3:29
-TGTAATTGG          aGATAATGA-
>Tup:TupE1:-:3:1     >NK7:NK72A11:-:2:30
-GGTAATTGa          tATTGATAGc
>Tup:TupE2:-:2:2     >NK7:NK72A12:+:3:31
cGCTAATTAg          cATTAATAG-
>Tup:TupE3:-:2:3:mod >NK7:NK72B2:+:3:32
CACTAATGt-          gGTTAAATA-
>Tup:TupE4:+:3:4     >NK7:NK72B4:+:3:34
aATTAAGTG-          aATTAAGTG-
>NK7:NK72B5:-:2:35  >Hgtx:HgtxC3:-:2:3
tATTAATAGt          aGCTAATTA-
>NK7:NK72B6:-:3:36  >Hgtx:HgtxC4:+:3:4
-ATTGATGGt          -GATAATTGg
>NK7:NK72B7:+:3:37  >Hgtx:HgtxC5:-:3:5
tATTAATGA-          tTGTAATTA-
>NK7:NK72B8:-:3:38  >Hgtx:HgtxC6:+:1:6
-CTTAATTAc          tTTTAATGA-
>NK7:NK72B9:+:3:39  >Hgtx:HgtxC7:-:3:7
cACTAATTA-          aTGTAATTA-
>NK7:NK72B10:-:3:40 >Hgtx:HgtxC8:+:3:8
-TTTAATAGg          -GTTAATTGa
>NK7:NK72B11:-:2:41 >Hgtx:HgtxC9:+:3:9
cCTTAATTGg          -CATAATGAg
>CG13424:CG13424E1:+:2:1 >Hgtx:HgtxD1:+:3:11
gCCTAATTGa          -GATAATTGc
>CG13424:CG13424E2:+:3:2 >Hgtx:HgtxD2:+:3:12
-TTTAATTAg          -CTTAATTAc
>CG13424:CG13424E3:-:3:3 >Hgtx:HgtxD3:+:3:13
gTTTAATTA-          -AATAATGaa
>CG13424:CG13424E4:+:3:4 >Hgtx:HgtxD4:+:2:14
-TATAATTGt          aATTAATTAa
>CG13424:CG13424E9:+:2:8 >Hgtx:HgtxD5:-:3:15
cATTAATGGg          tTTTAATTA-
>CG13424:CG13424E11:+:2:10 >Hgtx:HgtxD6:-:3:16
tATTAATTAg          cTTTAATTA-
>CG13424:CG13424E12:-:3:11 >Hgtx:HgtxD7:+:2:17
-tGTTAATGA-          -TTAATGAg
>CG13424:CG13424F2:-:3:12 >Hgtx:HgtxD8:-:3:18
aACTAATGG-          cTTTAATTA-
>CG13424:CG13424F3:+:3:13 >Hgtx:HgtxD9:-:3:19
-GGTAATTGc          tTTTAATGA-
>CG13424:CG13424F4:+:3:14 >Hgtx:HgtxD10:-:3:20
tCTAATGA-          aGTTAATGA-
>CG13424:CG13424F5:-:3:15 >Hgtx:HgtxD11:-:3:21
gTTTAATTA-          gTTTAATTA-
>CG13424:CG13424F7:+:2:17 >Ems:emsA1:+:2:1
gCATAATTGg          -TATAATTAa
>CG13424:CG13424F8:+:2:18 >Ems:emsA2:+:1:2
gTTTAATTGa          cATAAATGG-
>CG13424:CG13424C1:+:2:23 >Ems:emsA3:-:3:3
gGTTAATTAg          aTTTTATGA-
>CG13424:CG13424C5:-:3:26 >Ems:emsA5:+:2:5
gATTAATTA-          tATTAGTGaa
>CG13424:CG13424C6:-:3:27 >Ems:emsA6:+:3:6
tACTAATTG-          -AGTAATGAc
>CG13424:CG13424C7:+:3:28 >Ems:emsA7:+:3:7
-CCTAATAGc          -ATTAATGGa
>CG13424:CG13424C8:-:3:29 >Ems:emsA8:+:3:8
aGTTAATAG-          -GTTAATCAc
>CG13424:CG13424C12:+:2:33 >Ems:emsA9:-:3:9
tCCTAATTGg          cATAAATGA-
>CG13424:CG13424D1:+:2:34 >Ems:emsA10:+:3:10
tACTAATTGc          -TTTAATTAg
>CG13424:CG13424D2:+:2:35 >Ems:emsA11:+:2:11
tCCTAATTAt          cAATAATTGg
>Hgtx:HgtxC1:+:3:1  >Ems:emsA12:-:3:12
-ATTAATAGg          cATAAATTA-
>Hgtx:HgtxC2:-:1:2  >Ems:emsB2:+:3:14
-AGTAATTGa          -TATAATTGg
>Hgtx:HgtxC3:-:2:3  >Ems:emsB3:+:3:15
aGCTAATTA-          -TTTAATGGa
>Hgtx:HgtxC4:+:3:4  >Ems:emsB5:-:3:16
-GATAATTGg          tTCTAATGA-
>Hgtx:HgtxC5:-:3:5  >Ems:emsB6:-:3:17
tTGTAATTA-          gCCTAATGA-
>Hgtx:HgtxC6:+:1:6  >Ems:emsB7:-:3:18
tTTTAATGA-          cACTAATTA-
>Hgtx:HgtxC7:-:3:7  >Ems:emsB8:-:3:19
aTGTAATTA-          gTCTAATGA-
>Hgtx:HgtxC8:+:3:8  >Ems:emsB9:+:2:20
-GTTAATTGa          cTCTAATTGg
>Hgtx:HgtxC9:+:3:9  >Ems:emsB10:+:2:21
-CATAATGAg          cTCTAATTAg
>Hgtx:HgtxD1:+:3:11 >Ems:emsB11:+:2:22
-GATAATTGc          cGCTAATTAg
>Hgtx:HgtxD2:+:3:12 >Otp:OTPG1:+:1:1
-CTTAATTAc          -TTCAATTAt
>Hgtx:HgtxD3:+:3:13 >Otp:OTPG2:-:2:2
-AATAATGaa          tTCTAATTTg
>Hgtx:HgtxD4:+:2:14 >Otp:OTPG3:-:3:3
aATTAATTAa
>Hgtx:HgtxD5:-:3:15
tTTTAATTA-
>Hgtx:HgtxD6:-:3:16
cTTTAATTA-
>Hgtx:HgtxD7:+:2:17
-TTTAATGAg
>Hgtx:HgtxD8:-:3:18
cTTTAATTA-
>Hgtx:HgtxD9:-:3:19
tTTTAATGA-
>Hgtx:HgtxD10:-:3:20
aGTTAATGA-
>Hgtx:HgtxD11:-:3:21
gTTTAATTA-
>Ems:emsA1:+:2:1
-TATAATTAa
>Ems:emsA2:+:1:2
cATAAATGG-
>Ems:emsA3:-:3:3
aTTTTATGA-
>Ems:emsA5:+:2:5
tATTAGTGaa
>Ems:emsA6:+:3:6
-AGTAATGAc
>Ems:emsA7:+:3:7
-ATTAATGGa
>Ems:emsA8:+:3:8
-GTTAATCAc
>Ems:emsA9:-:3:9
cATAAATGA-
>Ems:emsA10:+:3:10
-TTTAATTAg
>Ems:emsA11:+:2:11
cAATAATTGg
>Ems:emsA12:-:3:12
cATAAATTA-
>Ems:emsB2:+:3:14
-TATAATTGg
>Ems:emsB3:+:3:15
-TTTAATGGa
>Ems:emsB5:-:3:16
tTCTAATGA-
>Ems:emsB6:-:3:17
gCCTAATGA-
>Ems:emsB7:-:3:18
cACTAATTA-
>Ems:emsB8:-:3:19
gTCTAATGA-
>Ems:emsB9:+:2:20
cTCTAATTGg
>Ems:emsB10:+:2:21
cTCTAATTAg
>Ems:emsB11:+:2:22
cGCTAATTAg
>Otp:OTPG1:+:1:1
-TTCAATTAt
>Otp:OTPG2:-:2:2
tTCTAATTTg
>Otp:OTPG3:-:3:3

```

```

-ATTAATTGc
>Otp:OTPG4+:+2:4
gTTTAATCA-
>Otp:OTPG5+:+3:5
tTGTAATTA-
>Otp:OTPG6:-:2:6
aATTAATGGt
>Otp:OTPG8+:+4:7
cGCTAATTT-
>Otp:OTPG9:-:2:8
gTTTAATGAg
>Otp:OTPG10:-:1:9
cTTTAATGA-
>Otp:OTPG11+:+1:10
-TTTAATTAa
>Otp:OTPG12+:+1:11
-CCTAATTAg
>Otp:OTPH1+:+2:12
cCTAATTAa
>Otp:OTPH2:-:2:13
cTGTAATTAg
>Otp:OTPH3+:+2:14
gCATAATTA-
>Otp:OTPH4:-:3:15
-GTTAATGAa
>Otp:OTPH5:-:2:16
cCTTAATTGa
>Otp:OTPH6:-:3:17
-TTTAATTAa
>Otp:OTPH7:-:3:18
-TCTAATTAa
>Otp:OTPH10+:+3:19
aACTAATTA-
>Otp:OTPH11:-:2:20
gTCTAATTAa
>Ftz:FtzG1+:+3:1
tCATAATTG-
>Ftz:FtzG3:-:3:3
-GTTAATGGg
>Ftz:FtzG4+:+3:4
tCTTAATTA-
>Ftz:FtzG6+:+3:6
tACTAATGA-
>Ftz:FtzG7+:+3:7
tATAAATGA-
>Ftz:FtzG8+:+3:8
tTTTAATTG-
>Ftz:FtzG9+:+3:9
gCCTAATGA-
>Ftz:FtzG10+:+3:10
aGTTAATTA-
>Ftz:FtzG11:-:3:11
-GTTAATGAT
>Ftz:FtzG12+:+3:12
gCTTAATTA-
>Ftz:FtzH1+:+3:13
gCTTAATGG-
>Ftz:FtzH3+:+3:15
cGTTAATTA-
>Ftz:FtzH5+:+3:16
aGTTAATGA-
>Ftz:FtzH7+:+3:18
tGTTAATTA-
>Ftz:FtzH8+:+3:19
gGTTAATTA-
>Ftz:FtzH9+:+3:20
tTTTAATGA-
>Ftz:FtzH10+:+3:21
tATAAATTA-
>Ftz:FtzH11+:+3:22
tGTTAATGA-
>Antp:AntpA02:-:3:1
cCTAATTA-
>Antp:AntpA03:-:3:2
aTTTAATTA-
>Antp:AntpA04:-:3:3
gCTTAATGA-
>Antp:AntpA05:-:3:4
tGTTAATGA-
>Antp:AntpA07:-:3:6
gTTTAATGA-
>Antp:AntpA08:-:3:7
gCTTAATGA-
>Antp:AntpA10:-:3:8
tACTAATTA-
>Antp:AntpA11:-:3:9
cCTTAATGG-
>Antp:AntpB01:-:3:11
tCATAATTA-
>Antp:AntpB02:-:3:12
tGTTAATTA-
>Antp:AntpB04:-:3:13
aTTTAATTA-
>Antp:AntpB06:-:3:14
gTTTAATGA-
>Antp:AntpB07:-:3:15
tTTTAATGA-
>Antp:AntpB09:-:3:17
gTTTAATTA-
>Antp:AntpB11:-:3:18
tTTTAATGA-
>Antp:AntpB12:-:3:19
cTTTAATGA-
>Zen2:Zen2A2+:+2:2
TTATAATGA-
>Zen2:Zen2A4+:+2:4
CCGTAATTA-
>Zen2:Zen2A6+:+2:6
TACTAATTG-
>Zen2:Zen2A7+:+2:7
GAGTAATGA-
>Zen2:Zen2A8+:+2:8
TGATAATGA-
>Zen2:Zen2A9+:+2:9
CCGTAATTA-
>Zen2:Zen2A10+:+2:10
TAGTAATTA-
>Zen2:Zen2B3+:+2:14
TACTAATTA-
>Zen2:Zen2B4:-:2:15
TACTAATGAc
>Zen2:Zen2B9+:+2:20
CCTTAATTA-
>Zen2:Zen2B11+:+2:22
AGTTAATGA-
>Zen2:Zen2E1:-:2:23
ACTTAATTat
>Zen2:Zen2E3+:+2:25
ATTTAATTA-
>Zen2:Zen2E4:-:2:26
TCATAATTGa
>Zen2:Zen2E5:-:2:27
TTTTAATGAc
>Zen2:Zen2E6+:+2:28
GCTAAATTA-
>Zen2:Zen2E7+:+2:29
CACTAACGA-
>Zen2:Zen2E9:-:2:31
CCTTAATTGc
>Zen2:Zen2E10+:+2:32
CCTTAATTA-
>Zen2:Zen2E11:-:2:33
TTTTAATTGc
>Zen2:Zen2F1+:+2:35
CCGTAATGA-
>Zen2:Zen2F3+:+2:37
TACTAATGA-
>Zen2:Zen2F5+:+2:39
TGCTAATTA-
>Zen2:Zen2F6+:+2:40
AGCTAATTA-
>Zen2:Zen2F7+:+1:41
TGTTAATGA-
>Zen2:Zen2F11+:+2:45
TGTTAATTA-
>Slou:SlouE2+:+3:2
-CCTAATGGc
>Slou:SlouE3+:+2:3
tTTTAATGAg
>Slou:SlouE4:-:3:4
gAGTAATGA-
>Slou:SlouE5:-:2:5
cGTCAATTAc
>Slou:SlouE6+:+3:6
-GCTAATTGt
>Slou:SlouE7:-:1:7
-GTTAATTat
>Slou:SlouE8+:+3:8
-TTTAATCGg
>Slou:SlouE9+:+3:9
-TTTAATAAt
>Slou:SlouE10+:+1:10
aATTAATTG-
>Slou:SlouE11:-:3:11
gTCTAATGA-
>Slou:SlouE12:-:3:12
tTCTAATGA-
>Slou:SlouF1:-:3:13
gGCTAATTA-
>Slou:SlouF2:-:3:14
cTCTAATG-
>Slou:SlouF3:-:2:15
cTATAATTAg
>Slou:SlouF4:-:1:16
-GTTAATTAg
>Slou:SlouF5+:+3:17
-CCTAATGGg
>Slou:SlouF6+:+3:18
-TATAATTGt
>Slou:SlouF7+:+3:19
-CCTAATTGa
>Slou:SlouF8+:+1:20
cTTTAGTAG-
>Slou:SlouF9+:+3:21
-TTTAATTGg
>Slou:SlouF10+:+3:22
-TTTAATTAc
>Slou:SlouF11+:+3:23
-GATAATTGg
>Btn:BtnE1+:+3:1
-TTTAATGGc
>Btn:BtnE2:-:3:2
cAGTAATGA-
>Btn:BtnE3:-:3:3
aCTTGATTA-
>Btn:BtnE4+:+3:4
-ATTAATGTa
>Btn:BtnE5+:+3:5
-CCTAATGGg
>Btn:BtnE6:-:3:6
cTGTAATTA-
>Btn:BtnE7+:+3:7
-GGTAATGAc
>Btn:BtnE8+:+3:8
-CCTAACGAc
>Btn:BtnE9:-:3:9
gCCTAATTA-
>Btn:BtnE10+:+3:10
-TATAATTGc
>Btn:BtnE11:-:1:11
-GATAATTaA
>Btn:BtnE12:-:3:12
tCGTAATGA-
>Btn:BtnF1+:+3:13
-TATAATGAt
>Btn:BtnF2:-:1:14
-CCTAATTaA
>Btn:BtnF3+:+3:15
-ATTAATGAc
>Btn:BtnF4:-:3:16
aTATAATGA-
>Btn:BtnF5+:+3:17
-GATAATTAg
>Btn:BtnF6+:+3:18
-ATTAATTAc
>Btn:BtnF7+:+3:19
-CCTAATGAc
>Btn:BtnF8:-:3:20
aCTTAATGA-
>Btn:BtnF9:-:3:21
cCTTAATGA-
>Btn:BtnF10:-:3:22
cGTTAATGA-
>Btn:BtnF11:-:3:23
aGTTAATGA-
>Dfd:dfd1+:+3:1
-CCTAATGAa
>Dfd:dfd2+:+3:2
-ATTAATGAc
>Dfd:dfd3+:+3:3
-TTTAATGAT
>Dfd:dfd4+:+3:4
-ATTAATGAc
>Dfd:dfd5+:+2:5
tGTTAATGAc
>Dfd:dfd6+:+3:6
-CCTAATTAg
>Dfd:dfd7+:+3:7
-ATTAATTat
>Dfd:dfd8+:+3:8
-CCTAATTAg
>Dfd:dfd9+:+3:9
-ATTAATGGg
>Dfd:dfd10:-:3:10
tTTTAATGA-
>Dfd:dfd11+:+3:11
-TTTAATGAc
>Dfd:dfd12:-:3:12
cACTAATGA-
>Dfd:dfd13:-:2:13
tCGTAATGA-
>Dfd:dfd14:-:3:14
gCTTAATGG-
>Dfd:dfd15:-:3:15
tCGTAATTA-
>Dfd:dfd16+:+2:16
-AGTAATGAg
>Dfd:dfd17+:+3:17
-CCTAATGAa
>Dfd:dfd18+:+3:18
-CCTAATGAc
>Dfd:dfd19:-:3:19
aCCTAATGA-
>Dfd:dfd20:-:3:20
gGATAATGA-
>Dfd:dfd21:-:3:21
gACTAATGA-
>Dfd:dfd22+:+3:22
-GTTAATGAT
>Dfd:dfd23:-:3:23
cGTTAATGA-
>Dfd:dfd24:-:3:24
aATTAATGA-
>Scr:ScrE04+:+1:1
CCTTAATGA-
>Scr:ScrE05+:+2:2
ACATAATGA-
>Scr:ScrE08+:+2:4
TACTAATTA-
>Scr:ScrE12+:+2:7
CCTTAATGA-
>Scr:ScrF02+:+1:9
CGATAATGA-
>Scr:ScrF04+:+2:10
ACTTAATGA-
>Scr:ScrF06+:+2:11
CGCTAATGA-
>Scr:ScrF11+:+2:15
CATTAAATGA-
>Scr:ScrF12+:+2:16
CGTTAATGA-
>Scr:ScrG1:-:2:17
CTTTAATTGc
>Scr:ScrG2+:+2:18
AATTAATGA-
>Scr:ScrG3+:+2:19
GTTTAATGA-
>Scr:ScrG5+:+2:20
CACTAATTA-
>Scr:ScrG6:-:2:21
CGTTAATTGc
>Scr:ScrG7+:+2:22
TGTTAATTA-
>Scr:ScrG8+:+1:23

```

CACTAATTA-  
 >Scr:ScrG9+:+2:24  
 CGTTAATTA-  
 >Scr:ScrG12+:+2:26  
 CGCTAATGA-  
 >Scr:ScrH1+:+1:27  
 TGTTAATGA-  
 >Scr:ScrH2+:+2:28  
 ACATAATGA-  
 >Scr:ScrH3+:+2:29  
 CGTTAATGA-  
 >Scr:ScrH4+:+2:30  
 TATAATGA-  
 >Scr:ScrH9+:+2:32  
 TACTAATGA-  
 >Scr:ScrH10+:+2:33  
 ATTTAATGA-  
 >Scr:ScrH11+:+2:34  
 CACTAATGA-  
 >Zen:ZenC1+:+2:1  
 CCTTAATTA-  
 >Zen:ZenC3+:+1:2  
 GACTAATTA-  
 >Zen:ZenC4+:+2:3  
 GGCTAATTA-  
 >Zen:ZenC5+:+2:4  
 TAATAATGA-  
 >Zen:ZenC8+:+2:7  
 ACCTAATGA-  
 >Zen:ZenC9+:+2:8  
 GTTTAATGA-  
 >Zen:ZenC10+:+2:9  
 CCCTAATGA-  
 >Zen:ZenC11+:+2:10  
 CGCTAATGA-  
 >Zen:ZenD2+:+2:12  
 CCCTAATGA-  
 >Zen:ZenD3+:+2:13  
 GCTTAATGA-  
 >Zen:ZenD4+:+2:14  
 ACCTAATGA-  
 >Zen:ZenD5+:+2:15  
 TGCTAATTA-  
 >Zen:ZenD6+:+2:16  
 CCTTAATGA-  
 >Zen:ZenD7+:+2:17  
 TTTTAATTA-  
 >Zen:ZenD9+:+2:18  
 ACATAATGA-  
 >Zen:ZenD11+:+1:19  
 TGCTAATGA-  
 >Pb:Pb1+:+3:1  
 -TCTAATGAC  
 >Pb:Pb2+:+3:2  
 -GTTAATTAC  
 >Pb:Pb3+:+3:3  
 -TTTAATTAC  
 >Pb:Pb4+:+3:4  
 -GTTAATGAC  
 >Pb:pBG2:-:3:5  
 tCCTAATTA-  
 >Pb:pBG3+:+2:6  
 -TTTAATGAG  
 >Pb:pBG4+:+3:7  
 -TATAATTAC  
 >Pb:pBG5:-:3:8  
 tGTTAATTA-  
 >Pb:pBG6+:+3:9  
 -ATAATTAC  
 >Pb:pBG7:-:3:10  
 aCATAATGA-  
 >Pb:pBG8:-:3:11  
 gACTAATGA-  
 >Pb:pBG9:-:3:12  
 cGTTAATGA-  
 >Pb:pBG11+:+3:13  
 -CTTAATGAG  
 >Pb:pBG12:-:1:14  
 -GCTAATTAA  
 >Pb:pBH1+:+3:15  
 -TTTAATTAC  
 >Pb:pBH3+:+3:16  
 -TATAATTAC  
 >Pb:pBH4:-:1:17  
 -GATAATTAT  
 >Pb:pBH6:-:3:19  
 tGCTAATGA-  
 >Pb:pBH7:-:1:20  
 -GCTAATTAA  
 >Pb:pBH8:-:3:21  
 gGTTAATGA-  
 >Pb:pBH9+:+1:22  
 cATTAATGA-  
 >Pb:pBH10+:+3:23  
 -TCTAATGAG  
 >Pb:pBH11+:+3:24  
 -TCTAATTAC  
 >Pb:pBH12:-:3:25  
 tGCTAATTA-  
 >Lab:LabE1+:+1:1  
 cgTTAATGA-  
 >Lab:LabE2:-:4:2  
 ccTTAATTA-  
 >Lab:LabE3:-:4:3  
 ggCTAATTA-  
 >Lab:LabE4+:+3:4  
 -aTTAATTAT  
 >Lab:LabE6:-:4:6  
 atTTAATTA-  
 >Lab:LabE7+:+3:7  
 -aTTAATTAG  
 >Lab:LabE8:-:4:8  
 agTTAATTA-  
 >Lab:LabE9:-:4:9  
 taCTAATTA-  
 >Lab:LabE10+:+4:10  
 --TTAAAGAA  
 >Lab:LabF1+:+3:12  
 -cTTAATGAC  
 >Lab:LabF5:-:4:16  
 tgTTAATTA-  
 >Lab:LabF9+:+3:20  
 -aTTAATGAC  
 >Lab:LabF11:-:4:22  
 gtCTAATGA-  
 >Lab:LabH6:-:4:25  
 tgTTAATTA-  
 >Lab:LabH7:-:4:26  
 tcTTAATTA-  
 >Lab:LabH12:-:4:31  
 acATAATGA-  
 >AbdA:AbdAG02:-:3:1  
 -tTTAATTAC  
 >AbdA:AbdAG03+:+4:2  
 cgTTAATGA-  
 >AbdA:AbdAG04+:+4:3  
 ttTTAATTA-  
 >AbdA:AbdAG06+:+1:5  
 --TTAATTAC  
 >AbdA:AbdAG07+:+4:6  
 tcTTTATTA-  
 >AbdA:AbdAG10+:+3:9  
 caCTAATTA-  
 >AbdA:AbdAG11+:+2:10  
 -cATAATTA-  
 >AbdA:AbdAG12+:+4:11  
 ttTTAATTA-  
 >AbdA:AbdAH03:-:3:14  
 -tTTAATGAC  
 >AbdA:AbdAH04+:+4:15  
 ttTTTATGA-  
 >AbdA:AbdAH05+:+4:16  
 taCTAATTC-  
 >AbdA:AbdAH06:-:3:17  
 -tTTAATTGc  
 >AbdA:AbdAH07:-:4:18  
 --TTAAAGAA  
 >AbdA:AbdAH08+:+4:19  
 atTTAATTA-  
 >AbdA:AbdAH09+:+4:20  
 cgCTAATGA-  
 >AbdA:AbdAH10+:+4:21  
 gtTTAATGA-  
 >AbdA:AbdAH11:-:3:22  
 -cTTAATTGc  
 >AbdA:AbdAH12+:+4:23  
 tcTTAATTAC  
 >Ap:ApA2:-:2:1  
 gGTTAATGAT  
 >Ap:ApA3+:+3:2  
 gACTAATTG-  
 >Ap:ApA4+:+3:3  
 gGTTAATTA-  
 >Ap:ApA5+:+3:4  
 aATAATGA-  
 >Ap:ApA6:-:2:5  
 cGCTAATTAG  
 >Ap:ApA7+:+3:6  
 tGCTAATTG-  
 >Ap:ApA8+:+1:7  
 -GCTAATTAA  
 >Ap:ApA9:-:2:8  
 tCATAATTGg  
 >Ap:ApA10:-:2:9  
 cCTTAATTAG  
 >Ap:ApA11+:+1:10  
 -ACAAATTAA  
 >Ap:ApB3+:+3:12  
 cCTTAATGA-  
 >Ap:ApB4:-:2:13  
 acTTAATTAG  
 >Ap:ApB5:-:3:14  
 -TTAATGAG  
 >Ap:ApB6+:+1:15  
 -ACTAATTAA  
 >Ap:ApB7+:+3:16  
 cGTTAATGA-  
 >Ap:ApB8+:+3:17  
 cGCTAATTA-  
 >Ap:ApB9+:+3:18  
 gACTAATTA-  
 >Ap:ApB10+:+2:19  
 cGCTAATGA-  
 >Ap:ApB11:-:2:20  
 tGCTAATTAG  
 >Ind:IndC1+:+2:1  
 GATTAATTA-  
 >Ind:IndC2+:+1:2  
 CGCTAATGA-  
 >Ind:IndC3+:+2:3  
 ACCTAATGA-  
 >Ind:IndC4:-:1:4  
 TATTAAGTG-  
 >Ind:IndC5:-:1:5  
 CTCTAATTA-  
 >Ind:IndC7+:+2:7  
 CGTTAATGA-  
 >Ind:IndC8+:+2:8  
 GATTAATGA-  
 >Ind:IndC9+:+2:9  
 CGTTAATGA-  
 >Ind:IndC10:-:2:10  
 TACTAATTAC  
 >Ind:IndC11:-:2:11  
 TATTAATTAC  
 >Ind:IndC12:-:2:12  
 TGTTAATGAG  
 >Ind:IndD1:-:2:13  
 CCTTAATTAG  
 >Ind:IndD3:-:2:14  
 TTCTAATTAC  
 >Ind:IndD4+:+2:15  
 CACTAATGA-  
 >Ind:IndD5+:+2:16  
 TGCTAATTA-  
 >Ind:IndD6+:+2:17  
 TCCTAATTA-  
 >Ind:IndD7+:+2:18  
 CACTAATGA-  
 >Ind:IndD8:-:2:19  
 TATTAATTGc  
 >Ind:IndD9+:+2:20  
 CACTAATTA-  
 >Ind:IndD10+:+2:21  
 CCCTAATTA-  
 >Ind:IndD11:-:2:22  
 TGCTAATTAG  
 >CG18599:CG18599C1:-:3:1  
 -tTTAATTGA  
 >CG18599:CG18599C2+:+4:2  
 tgCTAATGA-  
 >CG18599:CG18599C3+:+4:3  
 tgCTAATTA-  
 >CG18599:CG18599C4+:+4:4  
 aaTTAATTA-  
 >CG18599:CG18599C5+:+4:5  
 ctTTAATTA-  
 >CG18599:CG18599C6+:+1:6  
 --TTAATTAA  
 >CG18599:CG18599C7+:+3:7  
 aaTTAATTA-  
 >CG18599:CG18599C8+:+4:8  
 ccCTAATTG-  
 >CG18599:CG18599C9+:+4:9  
 gaTTAATGA-  
 >CG18599:CG18599C10:+4:10  
 atCTAATTA-  
 >CG18599:CG18599C11:+4:11  
 caCTAATGA-  
 >CG18599:CG18599C12:+4:12  
 cgCTAATTA-  
 >CG18599:CG18599D2:-:2:13  
 ttATAATGAG  
 >CG18599:CG18599D9+:+4:16  
 ccGTAATTA-  
 >CG18599:CG18599D10:+1:17  
 --TTAATCAC  
 >CG18599:CG18599D11:+4:18  
 acATAATGA-  
 >CG18599:CG18599F1+:+4:19  
 cgTTAATTA-  
 >CG18599:CG18599F2+:+4:20  
 taATAATGA-  
 >CG18599:CG18599F3+:+4:21  
 cgCTAATTA-  
 >CG18599:CG18599F4+:+4:22  
 cgTTAATTA-  
 >CG18599:CG18599F5+:+3:23  
 caCTAATTA-  
 >CG18599:CG18599F6+:+1:24  
 --CTAATTAG  
 >CG18599:CG18599F7+:+3:25  
 gcTTAATGA-  
 >CG18599:CG18599F11:+4:27  
 ttATAATGA-  
 >CG18599:CG18599F12:+4:28  
 gcCTAATTA-  
 >Lbe:IbeG2:-:3:1  
 -CATAATCAT

```

>Lbe:IbeG3:::3:2      -GCTAATTAa
atCTAAGTA-
>Lbe:IbeG4:::3:3      gACTAATGA-
gGTTAACCA-
>Lbe:IbeG5:::2:4      -CTTAACGAg
tCCTAATCac
>Lbe:IbeG6:::2:5      gACTAATGA-
cGTTAAATGa
>Lbe:IbeG7:::3:6      aATTAAGTaa
-GGTAATTAc
>Lbe:IbeG8:::3:7      tAATAATCGa
cTATAAGTA-
>Lbe:IbeG9:::3:8      tTCTAATCA-
-TGTAACAAg
>Lbe:IbeG10:::3:9     agTAAATTA-
-GTTAACCAg
>Lbe:IbeG11:::3:10    gCCTAATTA-
>Lbe:IbeG12:::4:11    gATTAACTA-
>Lbe:IbeH1:::3:12     cACTAACAA-
>Lbe:IbeH2:::3:13     -ACTAACGAg
>Lbe:IbeH3:::3:14     acATAATCA-
>Lbe:IbeH4:::3:15     cTTTAACAA-
>Lbe:IbeH5:::1:16     -GCTAATTAa
>Lbe:IbeH6:::3:17     -GTTAATTGg
>Lbe:IbeH7:::3:18     -GTTAATTAg
>Lbe:IbeH8:::1:19     -GATAACAA-
>Lbe:IbeH9:::3:20     -GTTAATTGg
>Lbe:IbeH10:::3:21    -TTTAACGAg
>Lbe:IbeH11:::3:22    -CTTAACGAg
>Lbl:LblC1:::3:1      -GATAATTAt
>Lbl:LblC2:::3:2      -TATAATTAc
>Lbl:LblC3:::3:3      gGATAATTG-
>Lbl:LblC4:::3:4      cACTAATCA-
>Lbl:LblC5:::1:5      -GCTAATTAt
>Lbl:LblC6:::3:6      tGCTAATTG-
>Lbl:LblC7:::1:7      -GTTAATTAA
>Lbl:LblC8:::3:8      aACTAACGA-
>Lbl:LblC9:::3:9      -CTTAATCag
>Lbl:LblC10:::2:10    -GATAATTGg
>Lbl:LblC11:::2:11    -GTTAACAAg
>Lbl:LblC12:::3:12    -CTTAACGAg
>Lbl:LblD1:::3:13     -TTTAATTGg
>Lbl:LblD2:::3:14     -CTTAACGAg
>Lbl:LblD3:::3:15     -CTTAATTGg
>Lbl:LblD4:::3:16     -GATAATTGg
>Lbl:LblD5:::3:17     gACTAATGA-
>Lbl:LblD6:::3:18     tGCTAATCA-
>Lbl:LblD7:::1:19     -GCTAATTAa
>Lbl:LblD8:::1:20     -GCTAATTAa
>Lbl:LblD9:::3:21     gACTAATGA-
>Lbl:LblD10:::3:22    -CTTAACGAg
>Lbl:LblD11:::3:23    gACTAATGA-
>Eve:Eve-G2:::2:2     aATTAAGTaa
>Eve:Eve-G3:::2:3     tAATAATCGa
>Eve:Eve-G4:::3:4     tTCTAATCA-
>Eve:Eve-G5:::3:5     agTAAATTA-
>Eve:Eve-G6:::3:6     tTCTAACGA-
>Eve:Eve-G7:::3:7     -TATAATGAt
>Eve:Eve-G8:::2:8     tACTAACGAc
>Eve:Eve-G9:::3:9     gGCTAATTG-
>Eve:Eve-G10:::2:10   gTCTAATTGa
>Eve:Eve-G11:::3:11   -GTTAATGTg
>Eve:Eve-G12:::3:12   -CATAATGAg
>Eve:Eve-H1:::1:13    -GTTAATTAa
>Eve:Eve-H2:::3:14    -GTTAATGGg
>Eve:Eve-H3:::3:15    -TTTAATGAc
>Eve:Eve-H4:::3:16    gTTTAATGA-
>Eve:Eve-H5:::3:17    tTTTAATTA-
>Eve:Eve-H6:::3:18    gGCTAATTA-
>Eve:Eve-H7:::3:19    cACTAATTA-
>Eve:Eve-H8:::2:20    tACTAATTAc
>Eve:Eve-H9:::3:21    tGCTAATGA-
>Eve:Eve-H10:::3:22   -ATTAATGAg
>Eve:Eve-H11:::3:23   -GTTAATGAc
>E5:E5C1:::3:1        -CCTAATTGa
>E5:E5C2:::2:2        aTTTAATTAa
>E5:E5C3:::2:3        tGTAATTTAg
>E5:E5C4:::1:4        gCTTAATGG-
>E5:E5C5:::1:5        -ATAAATTAa
>E5:E5C6:::3:6        tGTTAATAA-
>E5:E5C7:::3:7        cCGTAATTA-
>E5:E5C8:::2:8        gCTTAAGTA-
>E5:E5C9:::3:9        -GCTAATTGg
>E5:E5C10:::3:10     cTGTAATGA-
>E5:E5C11:::3:11     tTATAATTA-
>E5:E5C12:::2:12     tTCTAATTAa
>E5:E5D2:::3:14      gTATAATGA-
>E5:E5D3:::1:15      cACTAATGA-
>E5:E5D4:::3:16      tGTTAATTG-
>E5:E5D5:::3:17      gGCTAATTG-
>E5:E5D6:::2:41      tCTTAATTGa
>E5:E5D7:::3:42      cATTAATGA-
>E5:E5D8:::3:43      caATAATTA-
>E5:E5D9:::3:44      aTCTAATGA-
>E5:E5D10:::3:45     cGCTAATTA-
>E5:E5D11:::3:46     -GCTAATTAc
>BH1:B1HG8:::1:8      -GCTAATTGA
>BH1:B1HG9:::1:9      >BH1:B1HG9:::1:9
>BH1:B1HG10:::2:10   tGTTAAACGG
>BH1:B1HH9:::2:20    -CTTAATTGC
>BH1:BH12E2:::2:22   tTCTAAACGG
>BH1:BH12E3:::2:23   -GTTAATTGG
>BH1:BH12E4:::2:24   gGCTAATTGA
>BH1:BH12E5:::2:25   aGTTAATAGG
>BH1:BH12E6:::2:26   -GTTAATTGT
>BH1:BH12E7:::2:27   -GTTAATTGA
>BH1:BH12E8:::2:28   -CATAATTGC
>BH1:BH12E9:::2:29   tGTTAAACGG
>BH1:BH12E10:::2:30 tCTTAAACGG
>BH1:BH12E11:::2:31 tCTTAAACGG
>BH1:BH12E12:::2:32 aGATAATTGC
>BH1:BH12F1:::2:33  gGATAATTGA
>BH1:BH12F2:::2:34  >BH1:BH12F2:::2:34
aCTTAAACGT
>BH1:BH12F3:::1:35  -GATAATTAA
>BH1:BH12F4:::2:36  cTTTAAACGG
>BH1:BH12F6:::2:38  -ATTAAATGT
>BH1:BH12F11:::2:42 tTCTAATTGA
>BH2:BH2E1:::1:1     -GATAACCGG
>BH2:BH2E2:::1:2     -TTTAATTGC
>BH2:BH2E4:::1:3     -CTTAATAGT
>BH2:BH2E5:::1:4     -ACTAAATGG
>BH2:BH2E6:::1:5     -TTTAATAGG
>BH2:BH2E7:::1:6     -CTTAATGGC
>BH2:BH2E9:::1:8     -CTTAAAAGG
>BH2:BH2E10:::1:9    -ATTAATTGG
>BH2:BH2E11:::1:10   -GATAAATGA
>BH2:BH2E12:::1:11   -TCTAATGGG
>BH2:BH2F1:::1:12    -GATAATTGG
>BH2:BH2F2:::1:13    -CTTAAATGA
>BH2:BH2F3:::1:14    -TGTAATTGG
>BH2:BH2F4:::1:15    -CATAATTGG
>BH2:BH2F5:::1:16    -GATAATTGG
>BH2:BH2F6:::1:17    -TATAATTGC
>BH2:BH2F7:::1:18    >BH2:BH2F7:::1:18
-GTTAATTGA
>BH2:BH2F8:::1:19    -GTTAATTGC
>BH2:BH2F9:::1:20    -GTTAATTGA
>BH2:BH2F10:::1:21   -CTTAATTGA
>BH2:BH2F11:::1:22   -CTTAATTGG
>CG11085:CG11085G1:::1:1
:1:1
-CTTAATGGG
>CG11085:CG11085G3:::1:3
:1:3
-TTTAATTGG
>CG11085:CG11085G4:::1:4
:1:4
-TTTAATTGC
>CG11085:CG11085G5:::1:5
:1:5
-TTTAATAGG
>CG11085:CG11085G6:::1:6
:1:6
-CTTAATGGG
>CG11085:CG11085G7:::1:7
:1:7
-TTTAATTAC
>CG11085:CG11085G8:::1:8
:1:8
-TCTAATAGC

```

Cell, Volume 133

```
>CG11085:CG11085G9:+
:1:9
-CTTAATCGG
>CG11085:CG11085G11:
+:1:11
-CCTAATTGC
>CG11085:CG11085H2:+
:1:14
-GCTAATTGA
>CG11085:CG11085H4:+
:1:16
-GTTAATTGG
>CG11085:CG11085H6:+
:1:18
-ATTAATATG
>CG11085:CG11085H11:
+:1:23
-ATTAATTGA
>CG34031:CG34031E1:+
:3:1
-TGTAATTGt
>CG34031:CG34031E2:+
:2:2
cTTTAATTGc
>CG34031:CG34031E3:+
:3:3
-GTTAATTAG
>CG34031:CG34031E4:-
:3:4
tTTTATTG-
>CG34031:CG34031E5:+
:3:5
-ATTAATATGt
>CG34031:CG34031E6:-
:3:6
tTTTAATAG-
>CG34031:CG34031E7:-
:3:7
ccTTTATAG-
>CG34031:CG34031E8:+
:2:8
cTTTAATAGt
>CG34031:CG34031F3:+
:3:15
-GTTAATTGc
>CG34031:CG34031F4:+
:3:16
-CCTAATGGt
>CG34031:CG34031A1:+
:2:23
tATTAATTAG
>CG34031:CG34031A2:+
:3:24
-CCTAATAGa
>CG34031:CG34031A3:+
:2:25
gTTTAATTGg
>CG34031:CG34031A4:+
:2:26
gTTTAATTGc
>CG34031:CG34031A5:+
:3:27
-TTTAATTGc
>CG34031:CG34031A6:+
:3:28
-TCTAATTGt

>CG34031:CG34031A7:+
:2:29
gTTTAATTGc
>CG34031:CG34031A8:+
:3:30
-TTTTATAGt
>CG34031:CG34031A10:
-:3:32
tGTTAATTG-
>CG34031:CG34031A11:
+:3:33
-CCTAATTGt
>CG34031:CG34031A12:
+:3:34
-TTTAATAGg
>CG34031:CG34031B2:+
:3:35
-CCTAATTGc
>CG34031:CG34031B3:+
:3:36
-GTTAATTGa
>CG34031:CG34031B5:+
:3:37
-TTTAAATAg
>CG34031:CG34031B6:+
:3:38
-TTTAATAGa
>Hmx:HMxA2:+:4:1
tgTTAATTG-
>Hmx:HMxA3:+:4:2
agATAATTG-
>Hmx:HMxA4:+:4:3
cgCTAATTG-
>Hmx:HMxA5:-:4:4
--TTAATGg
>Hmx:HMxA6:+:4:5
taTTAATTG-
>Hmx:HMxA7:+:4:6
ccTTAATTG-
>Hmx:HMxA8:+:4:7
tgTTAATTG-
>Hmx:HMxA12:+:1:10
--TTAATTG-
>Hmx:HMxE1:+:4:11
cgTTAATTA-
>Hmx:HMxE2:+:4:12
acTTAATCG-
>Hmx:HMxE3:+:4:13
ctCTAATTG-
>Hmx:HMxE4:+:4:14
acTTAATCG-
>Hmx:HMxE5:+:4:15
taTTAATCG-
>Hmx:HMxE6:+:4:16
acTTAATTA-
>Hmx:HMxE7:+:4:17
agTTAATTA-
>Hmx:HMxE8:+:4:18
caCTAATTA-
>Hmx:HMxE9:+:4:19
gtTTAATTG-
>Hmx:HMxE10:+:4:20
atTTAATTG-
>Hmx:HMxF4:-:3:25
-cTTAATTGc
>Hmx:HMxF8:-:3:28
-cTTAATTGc

-cTTAATTGc
>Unc4:Unc4C1:-:1:1
-TCTAATTAg
>Unc4:Unc4C2:-:3:2
cTGTAATTA-
>Unc4:Unc4C3:+:3:3
-CCTAATTCg
>Unc4:Unc4C4:-:1:4
-GCTAATTAt
>Unc4:Unc4C5:-:1:5
-CCTAATTAt
>Unc4:Unc4C6:+:3:6
-CCTAATAGa
>Unc4:Unc4C7:+:2:7
tTTTAATTGg
>Unc4:Unc4C8:-:3:8
tCTTAATTG-
>Unc4:Unc4C9:+:3:9
-CCTAATTGg
>Unc4:Unc4C10:+:3:10
-TGTAATTGg
>Unc4:Unc4C11:+:3:11
-GTTAATTGc
>Unc4:Unc4C12:+:3:12
-CCTAATTGg
>Unc4:Unc4D1:-:3:13
cACTAATTA-
>Unc4:Unc4D3:+:3:15
-AATAATTGg
>Unc4:Unc4D4:+:3:16
-CCTAATTGg
>Unc4:Unc4D5:+:3:17
-GTTAATTGg
>Unc4:Unc4D6:+:3:18
-CCTAATTGg
>Unc4:Unc4D7:+:3:19
-TTTAATTGg
>Unc4:Unc4D8:+:3:20
-GTTAATTGg
>Unc4:Unc4D10:+:3:22
-GTTAATTGg
>Unc4:Unc4D11:+:3:23
-CCTAATTAg
>Odsh:OdshC1:-:4:1
ttGTAATTA-
>Odsh:OdshC2:+:2:2
-tTTAATTtc
>Odsh:OdshC3:+:2:3
tgCTAATTAt
>Odsh:OdshC4:-:3:4
taCTAATTAA
>Odsh:OdshC5:-:4:5
aaCTAATTG-
>Odsh:OdshC7:-:3:6
agCTAATTAA-
>Odsh:OdshC8:-:2:7
-cCTAATTAc
>Odsh:OdshC9:+:2:8
ccTTAATTGc
>Odsh:OdshC10:+:3:9
-gGTAATTAc
>Odsh:OdshC11:-:4:10
atTTAATTA-
>Odsh:OdshC12:+:3:11
-cCTAATTGt
>Odsh:OdshD1:+:3:12

-aTTAATTGt
>Odsh:OdshD2:+:2:13
atTTAATTGg
>Odsh:OdshD3:-:3:14
tgCTAATTAa
>Odsh:OdshD4:-:4:15
acTTAATTA-
>Odsh:OdshD5:-:2:16
-cCTAATTAa
>Odsh:OdshD6:-:2:17
-tCTAATTAa
>Odsh:OdshD7:-:4:18
cgCTAATTA-
>Odsh:OdshD8:+:3:19
-acTAATTGg
>Odsh:OdshD9:+:3:20
-tGTAATTGg
>Odsh:OdshD10:-:2:21
-cTTAATTAa
>Odsh:OdshD11:+:3:22
-gGTAATTAa
>Dr:DrA2:+:1:1
CCTCAATTA-
>Dr:DrA3:+:1:2
AAGCAATTA-
>Dr:DrA4:+:1:3
GGCCAATTA-
>Dr:DrA5:+:1:4
AACTAATTA-
>Dr:DrA6:+:1:5
CTCCAATTA-
>Dr:DrA7:+:1:6
CACCAATTA-
>Dr:DrA8:+:1:7
GAGCAATTA-
>Dr:DrA9:+:1:8
GGGTAATTA-
>Dr:DrA10:+:1:9
GAGTAATTA-
>Dr:DrA11:+:1:10
CGCTAATTA-
>Dr:DrB2:+:1:11
CTCCAATTA-
>Dr:DrB3:+:1:12
GGCCAATTA-
>Dr:DrB4:+:1:13
AAACAATTA-
>Dr:DrB5:+:1:14
AACCAATTA-
>Dr:DrB6:+:1:15
GAGCAATTA-
>Dr:DrB7:+:1:16
GACCAATTA-
>Dr:DrB8:+:1:17
CTCCAATTA-
>Dr:DrB9:+:1:18
GAGTAATTA-
>Dr:DrB10:+:1:19
CAGCAATTA-
>Dr:DrB11:+:1:20
CCCCAATTA-
>Dr:DrB12:+:1:21
GTCCAATTA-
```

Table S5. Crossvalidation analysis of fly homeodomains.

| Query   | ALLR   | Distance | p-value   | e-value   | Pred. Cons. | Actual Cons. | Combined Cons. |
|---------|--------|----------|-----------|-----------|-------------|--------------|----------------|
| Repo    | 9.9809 | 0.0512   | 7.90E-009 | 7.90E-009 | TAATTa      | TAATTA       | TAATTa         |
| Rx      | 9.9038 | 0.1058   | 9.29E-009 | 9.29E-009 | TAATTa      | TAATTR       | TAATTa         |
| Hbn     | 9.8023 | -0.2713  | 1.15E-008 | 1.15E-008 | TAATTa      | TAATTR       | TAATTa         |
| Al      | 9.7524 | 0.4103   | 1.28E-008 | 1.28E-008 | TAATTR      | TAATTA       | TAATTa         |
| Ptx1    | 9.6421 | 0.6916   | 1.61E-008 | 1.61E-008 | TAATCC      | TAATCC       | TAATCC         |
| Oc      | 9.6284 | 0.3647   | 1.65E-008 | 1.65E-008 | TAATCC      | TAATCC       | TAATCC         |
| Pph13   | 9.5617 | 0.1223   | 1.90E-008 | 1.90E-008 | TAATTA      | TAATTa       | TAATTA         |
| Gsc     | 9.5553 | 0.6155   | 1.93E-008 | 1.93E-008 | TAATCC      | TAATCc       | TAATCC         |
| Dfd     | 9.4429 | 0.2754   | 2.44E-008 | 2.44E-008 | TAATgA      | TAATGA       | TAATGA         |
| CG32532 | 9.4385 | 0.074    | 2.46E-008 | 2.46E-008 | TAATTa      | TAATTR       | TAATTa         |
| CG11294 | 9.3819 | 0.3812   | 2.77E-008 | 2.77E-008 | TAATTA      | TAATTA       | TAATTA         |
| Odsh    | 9.3406 | 0.2868   | 3.02E-008 | 3.02E-008 | TAATTR      | TAATTR       | TAATTR         |
| Scr     | 9.2996 | 0.3014   | 3.29E-008 | 3.29E-008 | TAATKA      | TAATGA       | TAATKA         |
| Ind     | 9.2047 | 0.2277   | 4.01E-008 | 4.01E-008 | TAATKA      | TAATKA       | TAATKA         |
| Zen2    | 9.1465 | 0.6703   | 4.53E-008 | 4.53E-008 | TAATGA      | TAATKA       | TAATKA         |
| Lab     | 9.1042 | 0.7574   | 4.95E-008 | 4.95E-008 | TAATGA      | TAATKA       | TAATgA         |
| Inv     | 9.0763 | 0.3488   | 5.25E-008 | 5.25E-008 | TAATTR      | TAATTa       | TAATTR         |
| En      | 9.0763 | 0.3488   | 5.25E-008 | 5.25E-008 | TAATTa      | TAATTR       | TAATTR         |
| Unc4    | 9.0702 | 0.8337   | 5.32E-008 | 5.32E-008 | TAATTa      | TAATTg       | TAATTR         |
| CG9876  | 9.067  | 0.3904   | 5.35E-008 | 5.35E-008 | TAATTa      | TAATTa       | TAATTa         |
| Otp     | 9.0266 | 0.456    | 5.83E-008 | 5.83E-008 | TAATTA      | TAATTA       | TAATTA         |
| Ftz     | 8.9761 | 0.0222   | 6.48E-008 | 6.48E-008 | TAATKA      | TAATKA       | TAATKA         |
| Zen     | 8.9689 | 0.699    | 6.57E-008 | 6.57E-008 | TAATKA      | TAATgA       | TAATKA         |
| Antp    | 8.8538 | 0.4076   | 8.37E-008 | 8.37E-008 | TAATKA      | TAATKA       | TAATKA         |
| PhdP    | 8.8293 | 0.1977   | 8.81E-008 | 8.81E-008 | TAATTA      | TAATTn       | TAATTa         |
| AbdA    | 8.7462 | 0.1147   | 1.05E-007 | 1.05E-007 | TAATKA      | TAATtA       | TAATKA         |
| Dr      | 8.6782 | 2.0874   | 1.21E-007 | 1.21E-007 | TAATTA      | TAATTG       | TAATTR         |
| Btn     | 8.6048 | 0.3618   | 1.41E-007 | 1.41E-007 | TAATKA      | TAATgA       | TAATKA         |
| Vis     | 8.5718 | 1.0373   | 1.51E-007 | 1.51E-007 | TGACAg      | TGACAn       | TGACA          |
| Achi    | 8.5718 | 1.0373   | 1.51E-007 | 1.51E-007 | TGACAn      | TGACAg       | TGACA          |
| Unpg    | 8.5501 | 1.4249   | 1.58E-007 | 1.58E-007 | TAATTA      | TAATTa       | TAATTA         |
| Ro      | 8.39   | 1.8609   | 2.21E-007 | 2.21E-007 | YAATTA      | TAATTA       | tAATTA         |
| Eve     | 8.3891 | 0.4253   | 2.21E-007 | 2.21E-007 | TAATKA      | TAATKA       | TAATKA         |
| CG33980 | 8.3842 | 0.9261   | 2.24E-007 | 2.24E-007 | TAATTa      | TAATTA       | TAATTA         |
| CG4136  | 8.3842 | 0.9261   | 2.24E-007 | 2.24E-007 | TAATTA      | TAATTa       | TAATTA         |
| Ubx     | 8.3467 | 0.5666   | 2.42E-007 | 2.42E-007 | TAATKA      | TAATta       | TAATKA         |
| Hth     | 8.3339 | 1.5492   | 2.48E-007 | 2.48E-007 | TGACAg      | TGACAg       | TGACA          |
| CG18599 | 8.325  | 1.2562   | 2.53E-007 | 2.53E-007 | TAATKA      | TAATtA       | TAATKA         |
| Pb      | 8.2429 | 1.6834   | 3.01E-007 | 3.01E-007 | TAATKA      | TAATKA       | TAATKA         |
| Awh     | 8.2022 | 1.0905   | 3.27E-007 | 3.27E-007 | TAATtA      | TAATTA       | TAATTA         |
| Ap      | 8.2022 | 1.0905   | 3.27E-007 | 3.27E-007 | TAATTA      | TAATtA       | TAATTA         |
| So      | 8.1879 | 2.4025   | 3.37E-007 | 3.37E-007 | TGATAC      | TGATAC       | TGATAC         |
| Tin     | 8.0367 | 1.177    | 4.63E-007 | 4.63E-007 | YAAGTR      | cAAGTG       | YAAGTg         |
| Bap     | 7.8641 | 2.6081   | 6.64E-007 | 6.64E-007 | CAAGTg      | TAAGTg       | YAAGTg         |
| Dll     | 7.8095 | 1.8343   | 7.45E-007 | 7.45E-007 | YAATTA      | YAATTA       | YAATTA         |
| BH2     | 7.7818 | 1.3614   | 7.89E-007 | 7.89E-007 | TAAWtG      | TAATtG       | TAATtG         |

**Cell, Volume 133**

|         |        |        |           |           |        |        |        |
|---------|--------|--------|-----------|-----------|--------|--------|--------|
| BH1     | 7.7818 | 1.3614 | 7.89E-007 | 7.89E-007 | TAATtG | TAAWtG | TAAttG |
| Optix   | 7.7705 | 2.0452 | 8.08E-007 | 8.08E-007 | TGATAC | TGATAn | TGATAC |
| CG34031 | 7.7609 | 1.7932 | 8.24E-007 | 8.24E-007 | TAATtG | TAATtG | TAATtG |
| CG13424 | 7.7235 | 0.9239 | 8.92E-007 | 8.92E-007 | TAATtR | TAATtR | TAATtR |
| Vnd     | 7.6846 | 1.9895 | 9.67E-007 | 9.67E-007 | tAAGTG | CAAGTR | YAAGTg |
| Slou    | 7.4995 | 1.1247 | 1.43E-006 | 1.43E-006 | TAATtR | TAATtR | TAATtR |
| Six4    | 7.4962 | 3.3833 | 1.44E-006 | 1.44E-006 | TGATAC | TGAnAC | TGATAC |
| Ems     | 7.4919 | 0.9041 | 1.45E-006 | 1.45E-006 | TAATKA | TAATKa | TAATKA |
| E5      | 7.4919 | 0.9041 | 1.45E-006 | 1.45E-006 | TAATKa | TAATKA | TAATKA |
| CG11085 | 7.4246 | 1.0618 | 1.67E-006 | 1.67E-006 | TAAttG | TAATtG | TAAttG |
| Hgtx    | 7.4223 | 1.6526 | 1.68E-006 | 1.68E-006 | TAATtR | TAATtA | TAATtR |
| NK7     | 7.376  | 1.4885 | 1.85E-006 | 1.85E-006 | TAATtR | TAATtR | TAATtR |
| Bsh     | 7.3414 | 1.302  | 1.98E-006 | 1.98E-006 | TAATtR | TAATKR | TAATtR |
| Exex    | 7.2781 | 4.8019 | 2.27E-006 | 2.27E-006 | TAATKA | TAATTA | TAAT   |
| Lim1    | 7.1013 | 3.0796 | 3.28E-006 | 3.28E-006 | TAATtA | TAATTA | TAATTA |
| Mirr    | 6.8517 | 0.3406 | 5.53E-006 | 5.53E-006 | taACAn | WaACAn | WaACA  |
| Ara     | 6.7625 | 0.493  | 6.67E-006 | 6.67E-006 | WAACAn | WaACAn | WaACA  |
| Caup    | 6.6398 | 0.3492 | 8.62E-006 | 8.62E-006 | WaACAn | tAACAn | WaACA  |
| Lbe     | 6.5811 | 1.563  | 9.75E-006 | 9.75E-006 | TAATtA | TAAynA | TAAtnA |
| Lbl     | 6.5811 | 1.563  | 9.75E-006 | 9.75E-006 | TAAynA | TAATtA | TAAtnA |
| Lim3    | 6.5461 | 2.1844 | 1.05E-005 | 1.05E-005 | TWATTR | TAATtA | TaATTa |
| C15     | 6.4381 | 2.6673 | 1.32E-005 | 1.32E-005 | TAATtG | TAAttR | TAAttG |
| CG32105 | 6.4272 | 2.9105 | 1.35E-005 | 1.35E-005 | TWATTR | TAATTA | TWATTR |
| CG4328  | 6.4272 | 2.9105 | 1.35E-005 | 1.35E-005 | TAATTA | TWATTR | TWATTR |
| Hmx     | 6.1889 | 4.7795 | 2.22E-005 | 2.22E-005 | TAAKTR | TAATTG | TAAtTg |
| H2      | 5.7098 | 1.9904 | 6.04E-005 | 6.04E-005 | TWATKA | TWATnA | TWATnA |
| AbdB    | 5.647  | 4.8563 | 6.89E-005 | 6.89E-005 | TAATKA | TTATga | TAATKA |
| CG12361 | 5.2354 | 5.7449 | 0.000163  | 0.000163  | TAATTA | TMATWA | TAATtA |
| Cad     | 5.0652 | 6.9451 | 0.0002328 | 0.0002328 | TAATgA | TtATtR | TAATKA |

Table S6. Fly factors used to predict the human homeodomains and confidence scores.

| Confidence Score | Human HD Query      | fly HD Ref | Similarity Score | #Key Residue matches | Ref. Key Residues (5,47,50,54 &55) | #Sites Contributed by Ref |
|------------------|---------------------|------------|------------------|----------------------|------------------------------------|---------------------------|
| 1                | ALX3                |            |                  |                      | RVQAK                              |                           |
|                  |                     | Pph13      | 316              | 5                    | RVQAK                              | 21                        |
|                  |                     | Hbn        | 311              | 5                    | RVQAK                              | 17                        |
|                  |                     | Al         | 310              | 5                    | RVQAK                              | 20                        |
| 1                | ALX4                |            |                  |                      | RVQAK                              |                           |
|                  |                     | Rx         | 315              | 5                    | RVQAK                              | 27                        |
|                  |                     | Al         | 314              | 5                    | RVQAK                              | 20                        |
|                  |                     | Pph13      | 311              | 5                    | RVQAK                              | 21                        |
|                  | ARGFX               |            |                  |                      | RVRFK                              |                           |
|                  | No predictions made |            |                  |                      |                                    |                           |
| 1                | ARX                 |            |                  |                      | RVQAK                              |                           |
|                  |                     | Al         | 349              | 5                    | RVQAK                              | 20                        |
|                  |                     | Pph13      | 348              | 5                    | RVQAK                              | 21                        |
|                  |                     | Hbn        | 333              | 5                    | RVQAK                              | 17                        |
| 1                | BARHL1              |            |                  |                      | RTQTK                              |                           |
|                  |                     | BH2        | 320              | 5                    | RTQTK                              | 21                        |
|                  |                     | BH1        | 310              | 5                    | RTQTK                              | 21                        |
| 1                | BARHL2              |            |                  |                      | RTQTK                              |                           |
|                  |                     | BH2        | 314              | 5                    | RTQTK                              | 21                        |
|                  |                     | BH1        | 304              | 5                    | RTQTK                              | 21                        |
| 3                | BARX1               |            |                  |                      | RTQMK                              |                           |
|                  |                     | Bsh        | 254              | 5                    | RTQMK                              | 16                        |
| 3                | BARX2               |            |                  |                      | RTQMK                              |                           |
|                  |                     | Bsh        | 242              | 5                    | RTQMK                              | 16                        |
| 2                | BSX                 |            |                  |                      | RTQMK                              |                           |
|                  |                     | Bsh        | 339              | 5                    | RTQMK                              | 16                        |
| 2                | CDX1                |            |                  |                      | RIQAK                              |                           |
|                  |                     | Cad        | 303              | 5                    | RIQAK                              | 38                        |
| 2                | CDX2                |            |                  |                      | RIQAK                              |                           |
|                  |                     | Cad        | 308              | 5                    | RIQAK                              | 38                        |
| 2                | CDX4                |            |                  |                      | RIQAK                              |                           |
|                  |                     | Cad        | 284              | 5                    | RIQAK                              | 38                        |
| 2                | CRX                 |            |                  |                      | RVKAK                              |                           |



Cell, Volume 133

|   |                     |             |     |   |       |    |
|---|---------------------|-------------|-----|---|-------|----|
|   |                     | Oc          | 327 | 5 | RVKAK | 19 |
|   | CUTL1               |             |     |   | RNHSR |    |
|   | No predictions made |             |     |   |       |    |
| 4 | CUTL2               |             |     |   | RNHSR |    |
|   |                     | Ct          | 203 | 4 | RNHMR | 20 |
| 2 | DBX1                |             |     |   | RIQMK |    |
|   |                     | CG12<br>361 | 334 | 5 | RIQMK | 16 |
| 2 | DBX2                |             |     |   | RIQMK |    |
|   |                     | CG12<br>361 | 306 | 5 | RIQMK | 16 |
| 2 | DLX1                |             |     |   | RIQSK |    |
|   |                     | DII         | 332 | 5 | RIQSK | 23 |
| 2 | DLX2                |             |     |   | RIQSK |    |
|   |                     | DII         | 316 | 5 | RIQSK | 23 |
| 2 | DLX3                |             |     |   | RIQSK |    |
|   |                     | DII         | 304 | 5 | RIQSK | 23 |
| 2 | DLX4                |             |     |   | RIQSK |    |
|   |                     | DII         | 320 | 5 | RIQSK | 23 |
| 2 | DLX5                |             |     |   | RIQSK |    |
|   |                     | DII         | 313 | 5 | RIQSK | 23 |
| 2 | DLX6                |             |     |   | RIQSK |    |
|   |                     | DII         | 321 | 5 | RIQSK | 23 |
| 3 | DMBX1               |             |     |   | RVKAK |    |
|   |                     | Gsc         | 260 | 5 | RVKAK | 22 |
|   |                     | Ptx1        | 252 | 5 | RVKAK | 20 |
|   |                     | Oc          | 243 | 5 | RVKAK | 19 |
| 1 | DRGX                |             |     |   | RVQAK |    |
|   |                     | Al          | 312 | 5 | RVQAK | 20 |
|   |                     | CG11<br>294 | 308 | 5 | RVQAK | 15 |
|   |                     | Pph13       | 295 | 5 | RVQAK | 21 |
| 1 | EMX1                |             |     |   | RVQTK |    |
|   |                     | E5          | 311 | 5 | RVQTK | 43 |
|   |                     | Ems         | 300 | 5 | RVQTK | 20 |
| 1 | EMX2                |             |     |   | RVQTK |    |
|   |                     | E5          | 323 | 5 | RVQTK | 43 |
|   |                     | Ems         | 307 | 5 | RVQTK | 20 |

Cell, Volume 133

|   |                     |            |     |   |       |    |
|---|---------------------|------------|-----|---|-------|----|
| 3 | EN1                 |            |     |   | RIQAK |    |
|   |                     | En         | 283 | 5 | RIQAK | 23 |
|   |                     | Inv        | 272 | 5 | RIQAK | 16 |
| 3 | EN2                 |            |     |   | RIQAK |    |
|   |                     | En         | 287 | 5 | RIQAK | 23 |
|   |                     | Inv        | 276 | 5 | RIQAK | 16 |
| 3 | ESX1                |            |     |   | RVQAK |    |
|   |                     | Hbn        | 265 | 5 | RVQAK | 17 |
|   |                     | Repo       | 264 | 5 | RVQAK | 28 |
|   |                     | Rx         | 260 | 5 | RVQAK | 27 |
| 2 | EVX1                |            |     |   | RVQMK |    |
|   |                     | Eve        | 354 | 5 | RVQMK | 22 |
| 2 | EVX2                |            |     |   | RVQMK |    |
|   |                     | Eve        | 358 | 5 | RVQMK | 22 |
| 2 | GBX1                |            |     |   | RIQAK |    |
|   |                     | Unpg       | 338 | 5 | RIQAK | 21 |
| 2 | GBX2                |            |     |   | RIQAK |    |
|   |                     | Unpg       | 337 | 5 | RIQAK | 21 |
| 2 | GSC                 |            |     |   | RVKAK |    |
|   |                     | Gsc        | 300 | 5 | RVKAK | 22 |
| 2 | GSCL                |            |     |   | RVKAK |    |
|   |                     | Gsc        | 282 | 5 | RVKAK | 22 |
| 2 | GSX1                |            |     |   | RIQVK |    |
|   |                     | Ind        | 300 | 5 | RIQVK | 21 |
| 2 | GSX2                |            |     |   | RIQVK |    |
|   |                     | Ind        | 299 | 5 | RIQVK | 21 |
|   | HESX1               |            |     |   | RIQAK |    |
|   | No predictions made |            |     |   |       |    |
| 3 | HHEX                |            |     |   | QTQAK |    |
|   |                     | CG70<br>56 | 267 | 5 | QTQAK | 26 |
| 2 | HLX                 |            |     |   | RVQMK |    |
|   |                     | H2         | 308 | 5 | RVQMK | 32 |
|   | HMBOX1              |            |     |   | RNAKE |    |
|   | No predictions made |            |     |   |       |    |
| 2 | HMX1                |            |     |   | RIQNK |    |
|   |                     | Hmx        | 346 | 5 | RIQNK | 20 |

Cell, Volume 133

|   |                     |      |     |   |       |    |
|---|---------------------|------|-----|---|-------|----|
| 3 | HMX2                |      |     |   | RTQNK |    |
|   |                     | Hmx  | 321 | 4 | RIQNK | 20 |
| 2 | HMX3                |      |     |   | RIQNK |    |
|   |                     | Hmx  | 345 | 5 | RIQNK | 20 |
|   | HNF1A               |      |     |   | RNAKE |    |
|   | No predictions made |      |     |   |       |    |
|   | HNF1B               |      |     |   | RNAKE |    |
|   | No predictions made |      |     |   |       |    |
| 2 | HOXA1               |      |     |   | RIQMK |    |
|   |                     | Lab  | 315 | 5 | RIQMK | 16 |
| 3 | HOXA10              |      |     |   | RIQMK |    |
|   |                     | AbdB | 259 | 5 | RIQMK | 21 |
|   |                     | Antp | 248 | 5 | RIQMK | 16 |
|   |                     | Scr  | 248 | 5 | RIQMK | 25 |
|   |                     | AbdA | 247 | 5 | RIQMK | 18 |
| 4 | HOXA11              |      |     |   | RIQMK |    |
|   |                     | AbdB | 251 | 5 | RIQMK | 21 |
|   |                     | Scr  | 218 | 5 | RIQMK | 25 |
|   |                     | Ftz  | 213 | 5 | RIQMK | 18 |
|   | HOXA13              |      |     |   | RIQVK |    |
|   | No predictions made |      |     |   |       |    |
| 2 | HOXA2               |      |     |   | RVQMK |    |
|   |                     | Pb   | 365 | 5 | RVQMK | 24 |
| 3 | HOXA3               |      |     |   | RIQMK |    |
|   |                     | Scr  | 279 | 5 | RIQMK | 25 |
|   |                     | Dfd  | 278 | 5 | RIQMK | 24 |
|   |                     | Ftz  | 273 | 5 | RIQMK | 18 |
| 1 | HOXA4               |      |     |   | RIQMK |    |
|   |                     | Dfd  | 355 | 5 | RIQMK | 24 |
|   |                     | Scr  | 351 | 5 | RIQMK | 25 |
|   |                     | Antp | 334 | 5 | RIQMK | 16 |
| 1 | HOXA5               |      |     |   | RIQMK |    |
|   |                     | Scr  | 361 | 5 | RIQMK | 25 |
|   |                     | Antp | 360 | 5 | RIQMK | 16 |
|   |                     | Dfd  | 342 | 5 | RIQMK | 24 |
| 1 | HOXA6               |      |     |   | RIQMK |    |
|   |                     | Antp | 375 | 5 | RIQMK | 16 |
|   |                     | Scr  | 351 | 5 | RIQMK | 25 |
|   |                     | AbdA | 341 | 5 | RIQMK | 18 |

Cell, Volume 133

|   |                     |      |     |   |       |    |
|---|---------------------|------|-----|---|-------|----|
| 1 | HOXA7               |      |     |   | RIQMK |    |
|   |                     | Antp | 390 | 5 | RIQMK | 16 |
|   |                     | Scr  | 372 | 5 | RIQMK | 25 |
|   |                     | AbdA | 356 | 5 | RIQMK | 18 |
| 3 | HOXA9               |      |     |   | RIQMK |    |
|   |                     | AbdB | 272 | 5 | RIQMK | 21 |
|   |                     | Scr  | 260 | 5 | RIQMK | 25 |
|   |                     | Antp | 254 | 5 | RIQMK | 16 |
| 2 | HOXB1               |      |     |   | RIQMK |    |
|   |                     | Lab  | 303 | 5 | RIQMK | 16 |
|   | HOXB13              |      |     |   | RIQVK |    |
|   | No predictions made |      |     |   |       |    |
| 2 | HOXB2               |      |     |   | RVQMK |    |
|   |                     | Pb   | 365 | 5 | RVQMK | 24 |
| 3 | HOXB3               |      |     |   | RIQMK |    |
|   |                     | Dfd  | 280 | 5 | RIQMK | 24 |
|   |                     | Scr  | 276 | 5 | RIQMK | 25 |
|   |                     | Ftz  | 275 | 5 | RIQMK | 18 |
| 1 | HOXB4               |      |     |   | RIQMK |    |
|   |                     | Dfd  | 355 | 5 | RIQMK | 24 |
|   |                     | Scr  | 351 | 5 | RIQMK | 25 |
|   |                     | Antp | 334 | 5 | RIQMK | 16 |
| 1 | HOXB5               |      |     |   | RIQMK |    |
|   |                     | Scr  | 361 | 5 | RIQMK | 25 |
|   |                     | Antp | 360 | 5 | RIQMK | 16 |
|   |                     | Dfd  | 342 | 5 | RIQMK | 24 |
| 1 | HOXB6               |      |     |   | RIQMK |    |
|   |                     | Antp | 374 | 5 | RIQMK | 16 |
|   |                     | Scr  | 353 | 5 | RIQMK | 25 |
|   |                     | AbdA | 345 | 5 | RIQMK | 18 |
| 1 | HOXB7               |      |     |   | RIQMK |    |
|   |                     | Antp | 385 | 5 | RIQMK | 16 |
|   |                     | Scr  | 353 | 5 | RIQMK | 25 |
|   |                     | AbdA | 345 | 5 | RIQMK | 18 |
| 1 | HOXB8               |      |     |   | RIQMK |    |
|   |                     | Antp | 342 | 5 | RIQMK | 16 |
|   |                     | AbdA | 315 | 5 | RIQMK | 18 |
|   |                     | Ubx  | 310 | 5 | RIQMK | 20 |
| 3 | HOXB9               |      |     |   | RIQMK |    |
|   |                     | AbdB | 267 | 5 | RIQMK | 21 |

Cell, Volume 133

|   |                     |      |     |   |       |    |
|---|---------------------|------|-----|---|-------|----|
|   |                     | Scr  | 258 | 5 | RIQMK | 25 |
|   |                     | Antp | 255 | 5 | RIQMK | 16 |
| 3 | HOXC10              |      |     |   | RIQMK |    |
|   |                     | AbdB | 254 | 5 | RIQMK | 21 |
|   |                     | Dfd  | 250 | 5 | RIQMK | 24 |
|   |                     | Antp | 248 | 5 | RIQMK | 16 |
| 3 | HOXC11              |      |     |   | RIQMK |    |
|   |                     | AbdB | 265 | 5 | RIQMK | 21 |
| 4 | HOXC12              |      |     |   | RIQMK |    |
|   |                     | AbdB | 232 | 5 | RIQMK | 21 |
|   |                     | Zen2 | 207 | 5 | RIQMK | 26 |
|   |                     | Ftz  | 202 | 5 | RIQMK | 18 |
|   | HOXC13              |      |     |   | RIQVK |    |
|   | No predictions made |      |     |   |       |    |
| 1 | HOXC4               |      |     |   | RIQMK |    |
|   |                     | Dfd  | 359 | 5 | RIQMK | 24 |
|   |                     | Scr  | 349 | 5 | RIQMK | 25 |
|   |                     | Antp | 332 | 5 | RIQMK | 16 |
| 1 | HOXC5               |      |     |   | RIQMK |    |
|   |                     | Scr  | 346 | 5 | RIQMK | 25 |
|   |                     | Antp | 340 | 5 | RIQMK | 16 |
|   |                     | Dfd  | 322 | 5 | RIQMK | 24 |
| 1 | HOXC6               |      |     |   | RIQMK |    |
|   |                     | Antp | 370 | 5 | RIQMK | 16 |
|   |                     | Scr  | 343 | 5 | RIQMK | 25 |
|   |                     | AbdA | 341 | 5 | RIQMK | 18 |
| 1 | HOXC8               |      |     |   | RIQMK |    |
|   |                     | Antp | 334 | 5 | RIQMK | 16 |
|   |                     | AbdA | 307 | 5 | RIQMK | 18 |
|   |                     | Ubx  | 302 | 5 | RIQMK | 20 |
| 3 | HOXC9               |      |     |   | RIQMK |    |
|   |                     | AbdB | 277 | 5 | RIQMK | 21 |
|   |                     | Scr  | 268 | 5 | RIQMK | 25 |
|   |                     | Antp | 262 | 5 | RIQMK | 16 |
| 2 | HOXD1               |      |     |   | RIQMK |    |
|   |                     | Lab  | 306 | 5 | RIQMK | 16 |
| 3 | HOXD10              |      |     |   | RIQMK |    |
|   |                     | AbdB | 257 | 5 | RIQMK | 21 |
|   |                     | AbdA | 247 | 5 | RIQMK | 18 |
|   |                     | Scr  | 246 | 5 | RIQMK | 25 |

Cell, Volume 133

|   |                     |      |     |   |       |    |
|---|---------------------|------|-----|---|-------|----|
| 4 | HOXD11              |      |     |   | RIQMK |    |
|   |                     | AbdB | 254 | 5 | RIQMK | 21 |
|   |                     | Ftz  | 221 | 5 | RIQMK | 18 |
|   |                     | Scr  | 221 | 5 | RIQMK | 25 |
| 3 | HOXD12              |      |     |   | RIQMK |    |
|   |                     | AbdB | 229 | 5 | RIQMK | 21 |
|   | HOXD13              |      |     |   | RIQVK |    |
|   | No predictions made |      |     |   |       |    |
| 3 | HOXD3               |      |     |   | RIQMK |    |
|   |                     | Scr  | 277 | 5 | RIQMK | 25 |
|   |                     | Dfd  | 276 | 5 | RIQMK | 24 |
|   |                     | Ftz  | 273 | 5 | RIQMK | 18 |
| 1 | HOXD4               |      |     |   | RIQMK |    |
|   |                     | Dfd  | 357 | 5 | RIQMK | 24 |
|   |                     | Scr  | 353 | 5 | RIQMK | 25 |
|   |                     | Antp | 336 | 5 | RIQMK | 16 |
| 1 | HOXD8               |      |     |   | RIQMK |    |
|   |                     | Antp | 339 | 5 | RIQMK | 16 |
|   |                     | AbdA | 322 | 5 | RIQMK | 18 |
|   |                     | Ubx  | 307 | 5 | RIQMK | 20 |
| 3 | HOXD9               |      |     |   | RIQMK |    |
|   |                     | AbdB | 281 | 5 | RIQMK | 21 |
|   |                     | Scr  | 265 | 5 | RIQMK | 25 |
|   |                     | AbdA | 256 | 5 | RIQMK | 18 |
| 3 | IRX1                |      |     |   | KTARR |    |
|   |                     | Mirr | 309 | 4 | RTARR | 41 |
|   |                     | Ara  | 300 | 4 | RTARR | 34 |
|   |                     | Caup | 300 | 4 | RTARR | 19 |
| 1 | IRX2                |      |     |   | RTARR |    |
|   |                     | Ara  | 330 | 5 | RTARR | 34 |
|   |                     | Caup | 330 | 5 | RTARR | 19 |
|   |                     | Mirr | 329 | 5 | RTARR | 41 |
| 3 | IRX3                |      |     |   | KTARR |    |
|   |                     | Mirr | 302 | 4 | RTARR | 41 |
|   |                     | Ara  | 301 | 4 | RTARR | 34 |
|   |                     | Caup | 301 | 4 | RTARR | 19 |
| 1 | IRX4                |      |     |   | RTARR |    |
|   |                     | Mirr | 352 | 5 | RTARR | 41 |
|   |                     | Ara  | 335 | 5 | RTARR | 34 |
|   |                     | Caup | 335 | 5 | RTARR | 19 |
| 1 | IRX5                |      |     |   | RTARR |    |

Cell, Volume 133

|   |       |             |     |   |       |    |
|---|-------|-------------|-----|---|-------|----|
|   |       | Ara         | 330 | 5 | RTARR | 34 |
|   |       | Caup        | 330 | 5 | RTARR | 19 |
|   |       | Mirr        | 329 | 5 | RTARR | 41 |
| 1 | IRX6  |             |     |   | RTARR |    |
|   |       | Mirr        | 344 | 5 | RTARR | 41 |
|   |       | Ara         | 340 | 5 | RTARR | 34 |
|   |       | Caup        | 340 | 5 | RTARR | 19 |
| 2 | ISL1  |             |     |   | RVQCK |    |
|   |       | Tup         | 353 | 5 | RVQCK | 16 |
| 2 | ISL2  |             |     |   | RVQCK |    |
|   |       | Tup         | 355 | 5 | RVQCK | 16 |
| 4 | ISX   |             |     |   | RIQAK |    |
|   |       | Unpg        | 204 | 5 | RIQAK | 21 |
| 1 | LBX1  |             |     |   | RTQAK |    |
|   |       | Lbe         | 332 | 5 | RTQAK | 22 |
|   |       | Lbl         | 327 | 5 | RTQAK | 23 |
| 3 | LBX2  |             |     |   | RTQAK |    |
|   |       | Lbl         | 287 | 5 | RTQAK | 23 |
|   |       | Lbe         | 280 | 5 | RTQAK | 22 |
| 2 | LHX1  |             |     |   | RVQSK |    |
|   |       | Lim1        | 330 | 5 | RVQSK | 18 |
| 2 | LHX2  |             |     |   | RVQAK |    |
|   |       | Ap          | 345 | 5 | RVQAK | 19 |
| 2 | LHX3  |             |     |   | RVQAK |    |
|   |       | Lim3        | 339 | 5 | RVQAK | 20 |
| 2 | LHX4  |             |     |   | RVQAK |    |
|   |       | Lim3        | 337 | 5 | RVQAK | 20 |
| 2 | LHX5  |             |     |   | RVQSK |    |
|   |       | Lim1        | 330 | 5 | RVQSK | 18 |
| 3 | LHX8  |             |     |   | RVQAR |    |
|   |       | Awh         | 253 | 5 | RVQAR | 40 |
| 2 | LHX9  |             |     |   | RVQAK |    |
|   |       | Ap          | 345 | 5 | RVQAK | 19 |
| 1 | LMX1A |             |     |   | RVQAK |    |
|   |       | CG43<br>28  | 317 | 5 | RVQAK | 30 |
|   |       | CG32<br>105 | 308 | 5 | RVQAK | 19 |

Cell, Volume 133

|   |                     |             |     |   |       |    |
|---|---------------------|-------------|-----|---|-------|----|
| 1 | LMX1B               |             |     |   | RVQAK |    |
|   |                     | CG43<br>28  | 317 | 5 | RVQAK | 30 |
|   |                     | CG32<br>105 | 308 | 5 | RVQAK | 19 |
| 2 | MEIS1               |             |     |   | RNIRR |    |
|   |                     | Hth         | 366 | 5 | RNIRR | 17 |
| 2 | MEIS2               |             |     |   | RNIRR |    |
|   |                     | Hth         | 371 | 5 | RNIRR | 17 |
|   | MEIS3               |             |     |   | DNIRR |    |
|   | No predictions made |             |     |   |       |    |
| 2 | MEIS3P2             |             |     |   | RNIRR |    |
|   |                     | Hth         | 335 | 5 | RNIRR | 17 |
| 2 | MEOX1               |             |     |   | RVQMK |    |
|   |                     | Btn         | 295 | 5 | RVQMK | 23 |
| 3 | MIXL1               |             |     |   | RVQAK |    |
|   |                     | CG11<br>294 | 234 | 5 | RVQAK | 15 |
|   |                     | Pph13       | 231 | 5 | RVQAK | 21 |
|   |                     | CG32<br>532 | 229 | 5 | RVQAK | 23 |
|   | MKX                 |             |     |   | RNARR |    |
|   | No predictions made |             |     |   |       |    |
| 2 | MNX1                |             |     |   | RIQMK |    |
|   |                     | Exex        | 339 | 5 | RIQMK | 23 |
| 2 | MSX1                |             |     |   | RIQAK |    |
|   |                     | Dr          | 333 | 5 | RIQAK | 21 |
| 2 | MSX2                |             |     |   | RIQAK |    |
|   |                     | Dr          | 335 | 5 | RIQAK | 21 |
|   | NANOG               |             |     |   | RTQMR |    |
|   | No predictions made |             |     |   |       |    |
|   | NANOGP1             |             |     |   | RTQMR |    |
|   | No predictions made |             |     |   |       |    |
|   | NANOGP8             |             |     |   | RTQMR |    |
|   | No predictions made |             |     |   |       |    |
| 2 | NKX2-1              |             |     |   | RIQYK |    |
|   |                     | Vnd         | 326 | 5 | RIQYK | 19 |
| 2 | NKX2-2              |             |     |   | RIQYK |    |



Cell, Volume 133

|   |         |            |     |   |       |    |
|---|---------|------------|-----|---|-------|----|
|   |         | Vnd        | 363 | 5 | RIQYK | 19 |
| 3 | NKX2-3  |            |     |   | RIQYK |    |
|   |         | Vnd        | 293 | 5 | RIQYK | 19 |
|   |         | Bap        | 276 | 5 | RIQYK | 23 |
|   |         | Tin        | 255 | 5 | RIQYK | 16 |
| 2 | NKX2-4  |            |     |   | RIQYK |    |
|   |         | Vnd        | 326 | 5 | RIQYK | 19 |
| 3 | NKX2-5  |            |     |   | RIQYK |    |
|   |         | Vnd        | 289 | 5 | RIQYK | 19 |
|   |         | Bap        | 268 | 5 | RIQYK | 23 |
|   |         | Tin        | 250 | 5 | RIQYK | 16 |
| 3 | NKX2-6  |            |     |   | RIQYK |    |
|   |         | Vnd        | 283 | 5 | RIQYK | 19 |
|   |         | Bap        | 257 | 5 | RIQYK | 23 |
|   |         | Tin        | 252 | 5 | RIQYK | 16 |
| 2 | NKX2-8  |            |     |   | RIQYK |    |
|   |         | Vnd        | 337 | 5 | RIQYK | 19 |
| 2 | NKX3-1  |            |     |   | RIQYK |    |
|   |         | Bap        | 306 | 5 | RIQYK | 23 |
| 2 | NKX3-2  |            |     |   | RIQYK |    |
|   |         | Bap        | 333 | 5 | RIQYK | 23 |
| 2 | NKX6-1  |            |     |   | RVQTK |    |
|   |         | Hgtx       | 368 | 5 | RVQTK | 20 |
| 2 | NKX6-2  |            |     |   | RVQTK |    |
|   |         | Hgtx       | 371 | 5 | RVQTK | 20 |
| 4 | NOBOX   |            |     |   | RVQAK |    |
|   |         | Al         | 235 | 5 | RVQAK | 20 |
|   |         | CG41<br>36 | 228 | 5 | RVQAK | 22 |
|   |         | PhdP       | 222 | 5 | RVQAK | 17 |
| 2 | ONECUT1 |            |     |   | RNMRR |    |
|   |         | onecu<br>t | 316 | 5 | RNMRR | 15 |
| 2 | ONECUT2 |            |     |   | RNMRR |    |
|   |         | onecu<br>t | 297 | 5 | RNMRR | 15 |
| 2 | OTP     |            |     |   | RVQAK |    |
|   |         | Otp        | 372 | 5 | RVQAK | 20 |
| 2 | OTX1    |            |     |   | RVKAK |    |

Cell, Volume 133

|   |                     |             |     |   |       |    |
|---|---------------------|-------------|-----|---|-------|----|
|   |                     | Oc          | 360 | 5 | RVKAK | 19 |
| 2 | OTX2                |             |     |   | RVKAK |    |
|   |                     | Oc          | 364 | 5 | RVKAK | 19 |
| 2 | PBX1                |             |     |   | RNGIR |    |
|   |                     | Exd         | 350 | 5 | RNGIR | 17 |
| 2 | PBX2                |             |     |   | RNGIR |    |
|   |                     | Exd         | 351 | 5 | RNGIR | 17 |
| 2 | PBX3                |             |     |   | RNGIR |    |
|   |                     | Exd         | 346 | 5 | RNGIR | 17 |
| 2 | PBX4                |             |     |   | RNGIR |    |
|   |                     | Exd         | 329 | 5 | RNGIR | 17 |
| 3 | PDX1                |             |     |   | RIQMK |    |
|   |                     | Scr         | 279 | 5 | RIQMK | 25 |
|   |                     | Dfd         | 271 | 5 | RIQMK | 24 |
|   |                     | Antp        | 271 | 5 | RIQMK | 16 |
| 2 | PITX2               |             |     |   | RVKAK |    |
|   |                     | Ptx1        | 374 | 5 | RVKAK | 20 |
| 2 | PITX3               |             |     |   | RVKAK |    |
|   |                     | Ptx1        | 374 | 5 | RVKAK | 20 |
| 2 | PKNOX1              |             |     |   | RNIRR |    |
|   |                     | Hth         | 285 | 5 | RNIRR | 17 |
| 2 | PKNOX2              |             |     |   | RNIRR |    |
|   |                     | Hth         | 301 | 5 | RNIRR | 17 |
| 3 | PROP1               |             |     |   | RVQAK |    |
|   |                     | CG32<br>532 | 281 | 5 | RVQAK | 23 |
|   |                     | Al          | 271 | 5 | RVQAK | 20 |
|   |                     | Pph13       | 251 | 5 | RVQAK | 21 |
| 1 | PRRX1               |             |     |   | RVQAK |    |
|   |                     | CG98<br>76  | 329 | 5 | RVQAK | 20 |
|   |                     | Pph13       | 301 | 5 | RVQAK | 21 |
| 1 | PRRX2               |             |     |   | RVQAK |    |
|   |                     | CG98<br>76  | 335 | 5 | RVQAK | 20 |
|   |                     | Pph13       | 302 | 5 | RVQAK | 21 |
|   | Predicted           |             |     |   | RNIHK |    |
|   | No predictions made |             |     |   |       |    |

Cell, Volume 133

|   |                     |             |     |   |       |    |
|---|---------------------|-------------|-----|---|-------|----|
| 2 | RAX                 |             |     |   | RVQAK |    |
|   |                     | Rx          | 388 | 5 | RVQAK | 27 |
| 2 | RAXL1               |             |     |   | RVQAK |    |
|   |                     | Rx          | 374 | 5 | RVQAK | 27 |
|   | RHOXF1              |             |     |   | RVKAR |    |
|   | No predictions made |             |     |   |       |    |
|   | RHOXF2              |             |     |   | VIEAK |    |
|   | No predictions made |             |     |   |       |    |
|   | SATB1               |             |     |   | RKQYY |    |
|   | No predictions made |             |     |   |       |    |
|   | SATB2               |             |     |   | RKQYH |    |
|   | No predictions made |             |     |   |       |    |
| 3 | SHOX                |             |     |   | RVQAK |    |
|   |                     | PhdP        | 280 | 5 | RVQAK | 17 |
|   |                     | CG11<br>294 | 276 | 5 | RVQAK | 15 |
|   |                     | Otp         | 275 | 5 | RVQAK | 20 |
| 3 | SHOX2               |             |     |   | RVQAK |    |
|   |                     | PhdP        | 280 | 5 | RVQAK | 17 |
|   |                     | CG11<br>294 | 276 | 5 | RVQAK | 15 |
|   |                     | Otp         | 275 | 5 | RVQAK | 20 |
| 2 | SIX1                |             |     |   | SNKQR |    |
|   |                     | So          | 361 | 5 | SNKQR | 27 |
| 2 | SIX2                |             |     |   | SNKQR |    |
|   |                     | So          | 365 | 5 | SNKQR | 27 |
| 2 | SIX3                |             |     |   | TNKQR |    |
|   |                     | Optix       | 372 | 5 | TNKQR | 27 |
| 2 | SIX4                |             |     |   | VNKQR |    |
|   |                     | Six4        | 306 | 5 | VNKQR | 20 |
| 2 | SIX5                |             |     |   | VNKQR |    |
|   |                     | Six4        | 307 | 5 | VNKQR | 20 |
| 2 | SIX6                |             |     |   | TNKQR |    |
|   |                     | Optix       | 367 | 5 | TNKQR | 27 |
| 1 | TGIF1               |             |     |   | RNIRR |    |
|   |                     | Vis         | 299 | 5 | RNIRR | 22 |
|   |                     | Achi        | 298 | 5 | RNIRR | 23 |
| 1 | TGIF2               |             |     |   | RNIRR |    |

Cell, Volume 133

|   |                     |             |     |   |       |    |
|---|---------------------|-------------|-----|---|-------|----|
|   |                     | Vis         | 311 | 5 | RNIRR | 22 |
|   |                     | Achi        | 310 | 5 | RNIRR | 23 |
| 4 | TGIF2LX             |             |     |   | KNIRR |    |
|   |                     | Vis         | 239 | 4 | RNIRR | 22 |
|   |                     | Achi        | 238 | 4 | RNIRR | 23 |
|   |                     | Hth         | 211 | 4 | RNIRR | 17 |
| 4 | TGIF2LY             |             |     |   | KNIRR |    |
|   |                     | Vis         | 234 | 4 | RNIRR | 22 |
|   |                     | Achi        | 233 | 4 | RNIRR | 23 |
|   |                     | Hth         | 206 | 4 | RNIRR | 17 |
| 2 | TLX1                |             |     |   | RTQTK |    |
|   |                     | C15         | 345 | 5 | RTQTK | 19 |
| 2 | TLX2                |             |     |   | RTQTK |    |
|   |                     | C15         | 328 | 5 | RTQTK | 19 |
| 2 | TLX3                |             |     |   | RTQTK |    |
|   |                     | C15         | 347 | 5 | RTQTK | 19 |
|   | VAX1                |             |     |   | RSNFK |    |
|   | No predictions made |             |     |   |       |    |
| 2 | VAX2                |             |     |   | RVQTK |    |
|   |                     | Ems         | 247 | 5 | RVQTK | 20 |
|   |                     | E5          | 235 | 5 | RVQTK | 43 |
|   | VENTX               |             |     |   | RTQMK |    |
|   | No predictions made |             |     |   |       |    |
| 1 | VSX1                |             |     |   | RVQAK |    |
|   |                     | CG33<br>980 | 328 | 5 | RVQAK | 13 |
|   |                     | CG41<br>36  | 296 | 5 | RVQAK | 22 |
|   |                     | Rx          | 291 | 5 | RVQAK | 27 |
| 1 | VSX2                |             |     |   | RVQAK |    |
|   |                     | CG33<br>980 | 341 | 5 | RVQAK | 13 |
|   |                     | CG41<br>36  | 306 | 5 | RVQAK | 22 |
|   |                     | Rx          | 303 | 5 | RVQAK | 27 |

Table S7. Prediction of TRANSFAC homeodomains.

| Predicted                                       | Actual                            | ALLR   | Dist       | E value       | P value       | Predicted Cons. | Actual Cons.    | Combine d Cons. |
|-------------------------------------------------|-----------------------------------|--------|------------|---------------|---------------|-----------------|-----------------|-----------------|
| T02970<br>mouse<br>Chx10                        | M00437.co<br>ns.L8.c2.to<br>pMx1  | 9.2938 | 4.15<br>72 | 4.44E-<br>008 | 4.44E-<br>008 | TAATTa          | GCTAATTA        | TAATTA          |
| T04139<br>human<br>Chx10                        | M00437.co<br>ns.L8.c2.to<br>pMx1  | 9.2938 | 4.15<br>72 | 4.44E-<br>008 | 4.44E-<br>008 | TAATTa          | GCTAATTA        | TAATTA          |
| T04142<br>chick<br>Chx10                        | M00437.co<br>ns.L8.c2.to<br>pMx1  | 9.2938 | 4.15<br>72 | 4.44E-<br>008 | 4.44E-<br>008 | TAATTa          | GCTAATTA        | TAATTA          |
| T08863<br>mouse S8                              | M00099.co<br>ns.L9.c2.to<br>pMx1  | 8.8487 | 1.27<br>48 | 1.27E-<br>007 | 1.27E-<br>007 | TAATTa          | TAATTRRnt       | TAATTR          |
| T03978<br>human<br>Cart-1                       | M00416.co<br>ns.L14.c2.t<br>opMx1 | 7.836  | 7.87<br>14 | 1.64E-<br>006 | 1.64E-<br>006 | TAATTA          | SnTAATtRnATTAn  | TAATTA          |
| T03981<br>clawed<br>frog Cart-<br>1             | M00416.co<br>ns.L14.c2.t<br>opMx1 | 7.836  | 7.87<br>14 | 1.64E-<br>006 | 1.64E-<br>006 | TAATTA          | SnTAATtRnATTAn  | TAATTA          |
| T03980<br>rat Cart-1                            | M00416.co<br>ns.L14.c2.t<br>opMx1 | 7.836  | 7.87<br>14 | 1.64E-<br>006 | 1.64E-<br>006 | TAATTA          | SnTAATtRnATTAn  | TAATTA          |
| T08295<br>mouse<br>Nkx2-2                       | M00485.co<br>ns.L9.c2.to<br>pMx1  | 7.2991 | 5.26<br>62 | 3.25E-<br>006 | 3.25E-<br>006 | CAAGTR          | TAAGTRnTT       | YAAGTR          |
| T04337<br>human<br>Nkx2-2                       | M00485.co<br>ns.L9.c2.to<br>pMx1  | 7.2991 | 5.26<br>62 | 3.25E-<br>006 | 3.25E-<br>006 | CAAGTR          | TAAGTRnTT       | YAAGTR          |
| T04272<br>chick<br>Nkx2-2                       | M00485.co<br>ns.L9.c2.to<br>pMx1  | 7.2991 | 5.26<br>62 | 3.25E-<br>006 | 3.25E-<br>006 | CAAGTR          | TAAGTRnTT       | YAAGTR          |
| T04265<br>golden<br>Syrian<br>hamster<br>Nkx2-2 | M00485.co<br>ns.L9.c2.to<br>pMx1  | 7.2991 | 5.26<br>62 | 3.25E-<br>006 | 3.25E-<br>006 | CAAGTR          | TAAGTRnTT       | YAAGTR          |
| T03489<br>cattle Crx                            | M00623.co<br>ns.L15.c2.t<br>opMx1 | 6.4759 | 5.53<br>7  | 3.04E-<br>005 | 3.04E-<br>005 | TAATCC          | YnnnTAAtCnnMnnn | TAATC           |
| T03458<br>rat Crx                               | M00623.co<br>ns.L15.c2.t<br>opMx1 | 6.4759 | 5.53<br>7  | 3.04E-<br>005 | 3.04E-<br>005 | TAATCC          | YnnnTAAtCnnMnnn | TAATC           |
| T03461<br>mouse<br>Crx                          | M00623.co<br>ns.L15.c2.t<br>opMx1 | 6.4759 | 5.53<br>7  | 3.04E-<br>005 | 3.04E-<br>005 | TAATCC          | YnnnTAAtCnnMnnn | TAATC           |
| T02792<br>human<br>Crx                          | M00623.co<br>ns.L15.c2.t<br>opMx1 | 6.4759 | 5.53<br>7  | 3.04E-<br>005 | 3.04E-<br>005 | TAATCC          | YnnnTAAtCnnMnnn | TAATC           |
| T00857<br>human<br>Nkx2-1                       | M00432.co<br>ns.L8.c2.to<br>pMx1  | 6.264  | 4.60<br>36 | 2.52E-<br>005 | 2.52E-<br>005 | CAAGTR          | ASTCAAGT        | CAAGT           |
| T00856<br>rat Nkx2-<br>1                        | M00432.co<br>ns.L8.c2.to<br>pMx1  | 6.264  | 4.60<br>36 | 2.52E-<br>005 | 2.52E-<br>005 | CAAGTR          | ASTCAAGT        | CAAGT           |
| T02098<br>dog Nkx2-<br>1                        | M00432.co<br>ns.L8.c2.to<br>pMx1  | 6.264  | 4.60<br>36 | 2.52E-<br>005 | 2.52E-<br>005 | CAAGTR          | ASTCAAGT        | CAAGT           |
| T00859<br>mouse<br>Nkx2-1                       | M00432.co<br>ns.L8.c2.to<br>pMx1  | 6.264  | 4.60<br>36 | 2.52E-<br>005 | 2.52E-<br>005 | CAAGTR          | ASTCAAGT        | CAAGT           |
| T00856<br>rat Nkx2-<br>1                        | M00794.co<br>ns.L9.c2.to<br>pMx1  | 5.911  | 5.21<br>32 | 5.95E-<br>005 | 5.94E-<br>005 | CAAGTR          | cTcAAGnGY       | cAAGtg          |

Cell, Volume 133

|                                      |                                   |        |             |               |               |         |                  |        |
|--------------------------------------|-----------------------------------|--------|-------------|---------------|---------------|---------|------------------|--------|
| T04271<br>chick<br>Nkx2-1            | M00794.co<br>ns.L9.c2.to<br>pMx1  | 5.911  | 5.21<br>32  | 5.95E-<br>005 | 5.94E-<br>005 | CAAGTR  | cTcAAGnGY        | cAAGtg |
| T00859<br>mouse<br>Nkx2-1            | M00794.co<br>ns.L9.c2.to<br>pMx1  | 5.911  | 5.21<br>32  | 5.95E-<br>005 | 5.94E-<br>005 | CAAGTR  | cTcAAGnGY        | cAAGtg |
| T00857<br>human<br>Nkx2-1            | M00794.co<br>ns.L9.c2.to<br>pMx1  | 5.911  | 5.21<br>32  | 5.95E-<br>005 | 5.94E-<br>005 | CAAGTR  | cTcAAGnGY        | cAAGtg |
| T02098<br>dog Nkx2-<br>1             | M00794.co<br>ns.L9.c2.to<br>pMx1  | 5.911  | 5.21<br>32  | 5.95E-<br>005 | 5.94E-<br>005 | CAAGTR  | cTcAAGnGY        | cAAGtg |
| T05157<br>human<br>RX                | M00623.co<br>ns.L15.c2.t<br>opMx1 | 5.8299 | 7.26<br>43  | 0.000117<br>4 | 0.000117<br>4 | TAATTR  | YnnnTAAAtCnnMnnn | TAAT   |
| T00863<br>fruit fly<br>Ubx           | M00018.co<br>ns.L4.c2.to<br>pMx1  | 5.7005 | 3.42<br>02  | 4.11E-<br>005 | 4.11E-<br>005 | TAATKA  | TAAT             | TAAT   |
| T03848<br>red flour<br>beetle<br>Ubx | M00018.co<br>ns.L4.c2.to<br>pMx1  | 5.7005 | 3.42<br>02  | 4.11E-<br>005 | 4.11E-<br>005 | TAATKA  | TAAT             | TAAT   |
| T01481<br>human<br>Pbx1a             | M00124.co<br>ns.L9.c2.to<br>pMx1  | 5.1275 | 11.4<br>862 | 0.000306<br>6 | 0.000306<br>5 | TGAcaa  | TTGATTGAT        | TGA    |
| T01481<br>human<br>Pbx1a             | M00096.co<br>ns.L9.c2.to<br>pMx1  | 5.0303 | 11.8<br>509 | 0.000375<br>7 | 0.000375<br>7 | TGAcaa  | AAGCTTGAT        | TGA    |
| T01481<br>human<br>Pbx1a             | M00998.co<br>ns.L8.c2.to<br>pMx1  | 4.0228 | 8.64<br>73  | 0.002752      | 0.002749      | TGAcaa  | tGATTGAT         | TGA    |
| T01992<br>fruit fly<br>Abd-A         | M01083.co<br>ns.L10.c2.t<br>opMx1 | 2.4675 | 12.5<br>216 | 0.08927       | 0.0854        | TAATKA  | AARTaAwww        | TAAT   |
| T04367<br>human<br>NCX               | M00484.co<br>ns.L10.c2.t<br>opMx1 | 1.9307 | 7.21<br>97  | 0.2746        | 0.2401        | TAAAttR | nngtAAntng       | TAA    |
| T04368<br>mouse<br>Ncx               | M00484.co<br>ns.L10.c2.t<br>opMx1 | 1.9307 | 7.21<br>97  | 0.2746        | 0.2401        | TAAAttR | nngtAAntng       | TAA    |

**Table S8. Examples of functional (*in vivo*) homeodomain binding sites consistent with their monomeric specificity**

| HD        | Target gene        | References                                                                                                                                                                                                                                           | Notes                                                                                                                                                                                                                                                                                                                                                                       | enhancer element name*    |
|-----------|--------------------|------------------------------------------------------------------------------------------------------------------------------------------------------------------------------------------------------------------------------------------------------|-----------------------------------------------------------------------------------------------------------------------------------------------------------------------------------------------------------------------------------------------------------------------------------------------------------------------------------------------------------------------------|---------------------------|
| Cad       | <i>ftz</i>         | Dearolf, C.R., Topol, J., and Parker, C.S. (1989). <i>Nature</i> 341, 340-343.                                                                                                                                                                       | Activation of the <i>ftz</i> zebra stripe element is facilitated by cad binding sites where direct mutation of these sites abrogates activity.                                                                                                                                                                                                                              | <i>ftz</i> zebra stripe   |
| Tin       | <i>mef2</i>        | Gajewski, K., Kim, Y., Lee, Y.M., Olson, E.N., and Schulz, R.A. (1997). <i>EMBO J</i> 16, 515-522.                                                                                                                                                   | A pair of tinman sites is required for enhancer function in myocyte precursors as demonstrated by loss of <i>lacZ</i> expression when the sites are mutated in report assay.                                                                                                                                                                                                | Mef2_IIA237               |
| Tin       | <i>beta3Tub60D</i> | Kremser, T., Gajewski, K., Schulz, R.A., and Renkawitz-Pohl, R. (1999). <i>Dev Biol</i> 216, 327-339                                                                                                                                                 | Identified 3 tinman sites, 2 are required for reporter transcription in dorsal vessel cells. Mutation of tin sites in enhancer disrupts expression.                                                                                                                                                                                                                         | betaTub60D_b3-lac333      |
| Bap       | <i>beta3Tub60D</i> | Zaffran, S., and Frasch, M. (2002). <i>Mech. Dev.</i> 114, 85-93.                                                                                                                                                                                    | Identifies single pair of overlapping bap sites that are responsible for tissue specific gene expression                                                                                                                                                                                                                                                                    | betaTub60D_beta3-14/vm1   |
| Tin       | <i>Sur</i>         | Akasaka, T., Klinedinst, S., Ocorr, K., Bustamante, E.L., Kim, S.K., and Bodmer, R. (2006). <i>Proc Natl Acad Sci U S A</i> 103, 11999-12004. & Hendren, J.D., Shah, A.P., Arguelles, A.M., and Cripps, R.M. (2007). <i>Mech. Dev.</i> 124, 416-426. | In this gene a tin-responsive enhancer was discovered using bioinformatics approaches looking for tin binding sites based on the consensus sequence.                                                                                                                                                                                                                        | En3                       |
| Tin       | <i>svp</i>         | Ryan, K.M., Hendren, J.D., Helander, L.A., and Cripps, R.M. (2007). <i>Dev Biol</i> 302, 694-702.                                                                                                                                                    | In this gene a tin-responsive enhancer was discovered using bioinformatics approaches looking for tin binding sites based on the consensus sequence where the identified sites were conserved over multiple genomes.                                                                                                                                                        | SCE                       |
| Tin       | <i>eve</i>         | Knirr, S., and Frasch, M. (2001). <i>Dev Biol</i> 238, 13-26.                                                                                                                                                                                        | Mutation of 2 tin sites identified based on its consensus recognition element inactivates enhancer                                                                                                                                                                                                                                                                          | EME b3'                   |
| Bcd & Cad | <i>kni</i>         | Rivera-Pomar, R., Lu, X., Perrimon, N., Taubert, H., and Jackle, H. (1995). <i>Nature</i> 376, 253-256.                                                                                                                                              | Demonstrates that sets of binding sites for cad and bcd are sufficient for anterior patterned expression in absence of other factor binding sites. Composition of sites not critical, just number and quality.                                                                                                                                                              | kni_64                    |
| Ap        | <i>Ser</i>         | Yan, S.J., Gu, Y., Li, W.X., and Fleming, R.J. (2004). <i>Development</i> 131, 285-298.                                                                                                                                                              | 14 Ap sites identified by DNaseI footprinting when mutated abrogate activity.                                                                                                                                                                                                                                                                                               | Ser_minimal_wing_enhancer |
| Bcd       | <i>eve</i>         | Armosti, D.N., Barolo, S., Levine, M., and Small, S. (1996). <i>Development</i> 122, 205-214.                                                                                                                                                        | Mutating individual bcd sites reduces activity. Adding novel sites to new positions restores activity demonstrating that the bcd site position is not critical.                                                                                                                                                                                                             | eve_stripe2               |
| Ubx       | <i>sal</i>         | Galant, R., Walsh, C.M., and Carroll, S.B. (2002). <i>Development</i> 129, 3115-3126.                                                                                                                                                                | Ubx represses <i>sal</i> expression in the haltere. The development of the haltere is not dependent on Exd or Hth, so the interaction of Ubx with the sal 328 element is thought to be independent of these TFs (although potentially dependent on other unknown TFs). Mutation of individual Ubx sites results in a loss of repression of the reporter gene in the haltere | sal 328                   |
| Dfd       | <i>rpr</i>         | Lohmann, I., McGinnis, N., Bodmer, M., and McGinnis, W. (2002). <i>Cell</i> 110, 457-466.                                                                                                                                                            | Dfd regulates <i>rpr</i> in maxillary segment boundary. Loss of 4 Dfd sites severely decreases reporter expression. Gel shift analysis suggests that Exd does not bind cooperatively with Dfd on this element.                                                                                                                                                              | rpr_4S3                   |

HD= homeodomain; \*Enhancer names were taken directly from the literature or extracted from REDfly

**Table S9. Similarity of predicted and determined recognition motifs for six human homeodomains**

| Factor Comparison | ALLR score | ALLR Distance | E value   | P value   | predicted consensus | actual consensus | combined consensus |
|-------------------|------------|---------------|-----------|-----------|---------------------|------------------|--------------------|
| BarHL1            | 7.8848     | 1.5896        | 8.48E-007 | 8.48E-007 | TAAttG              | nTAAtTGn         | TAAtTG             |
| Nkx3-2            | 9.1699     | 0.6191        | 5.04E-008 | 5.04E-008 | TAAGTg              | YTAAGTG          | TAAGTG             |
| PitX2             | 10.1543    | 0.114         | 5.50E-009 | 5.50E-009 | TAATCC              | TAATCC           | TAATCC             |
| Six3              | 7.6043     | 0.962         | 1.27E-006 | 1.27E-006 | TGATA               | nnSTGATA         | TGATA              |
| TGIF2             | 8.5538     | 1.3843        | 1.83E-007 | 1.83E-007 | TGACAg              | ntTGACA          | TGACA              |
| Vsx1              | 9.5817     | 0.2637        | 2.13E-008 | 2.13E-008 | TAATTa              | tTAATTA          | TAATTa             |

### Supplemental Discussion

A more detailed discussion of the specificity determinants that can influence each binding site position.

**BS Position 1:** 89% of the aligned recognition sequences have Thy at this position. Consistent with this preference, the majority of homeodomains (94%) have Arg5 in the N-terminal arm, which specifies Thy (Ades and Sauer, 1995). In the Six family, Thy is preferred in the absence of Arg5, which is potentially due to the favorable stacking of the T-methyl group over Arg55 as it interacts with Gua at position 2 of the binding site (Figure 3B). In the NK-2 class, Val6 and Leu7 promote a preference for Cyt over Thy (Damante et al., 1996).

**BS Position 2:** Preferences for Ade, Gua or Thy are observed among the different homeodomains. 83% of the aligned sequences have Ade at this position. Consistent with this preference, most typical homeodomains contain Arg2 or Arg3 within the N-terminal arm, which structural and biochemical studies have implicated in biasing specificity toward Ade (Ades and Sauer, 1995; Hovde et al., 2001). However, both Lab and HGTX, which lack either arginine, strongly prefer Ade, which is consistent with reports of an additional unidentified specificity determinant (Ades and Sauer, 1995). Members of the Abd-B group display a preference for Thy over Ade, but the responsible specificity determinants are unclear. In atypical homeodomains Arg55 specifies Gua; however, several typical homeodomains contain Arg55, yet display a preference for Ade (e.g. Awh and Bcd), indicating that additional residues contribute to specification of Gua.

**BS Position 3:** Asn51 specifies Ade at this position.

**BS Position 4:** Any base can be specified at this position. Thy is the most common base (80%) and is strongly correlated with the presence of Ile or Val at position 47. The three exceptions that contain Val at position 47 - Bap, Tin and Vnd - are NK-2 class homeodomains, which prefer Gua due to a direct contact by Tyr54 to the complementary strand Cyt (Gruschus et al., 1997). Cyt specificity is strongly correlated with the presence of Arg54, which interacts with the complementary Gua. Bcd is one notable exception; it contains both Ile47 and Arg54, yet displays strong preference for Thy, which suggests that the base preference of Ile47 may supercede Arg54 (explored in the Bcd mutagenesis). Decreased specificity at position 4 is correlated with either Thr47 or Asn47, although the presence of a  $\beta$ -branched amino acid at position 43 modifies the degree of preference (Supplementary Figure 7B). Finally, Cut displays a unique preference for Ade at position 4; His50, which only occurs in this homeodomain, may be responsible.

**BS Position 5:** For many specificity groups correlations exist between the residues at positions 47, 50 and 54 and certain base preferences. Specificity groups that have Gln50 and either Ile47 or Val47 display preferences that correlate with the residue at position 54. When Met54 is present (Antp group) a tolerance is observed for either Gua or Thy, whereas when Ala54 (En group) or Tyr54 (NK-2 group) are present, a preference for Thy is observed. When Lys50 occurs with Ile47 or Val47 and Ala54 (Bcd group) a strong preference for Cyt is observed (Ades and Sauer, 1994; Hanes and Brent, 1989; Percival-Smith et al., 1990; Treisman et al., 1989). However, Lys50 in the presence of Asn47 and Gln54 (Six family) specifies Ade instead of Cyt. An influence of position 54 on the specificity mediated by Lys50 has also been observed in other contexts (Pellizzari et al., 1997). Finally, when Arg54 is present in the absence of Ile47 or Val47



(Iroquois and TGIF groups) a preference for Ade is observed, which is likely due to preferential stacking of the complementary T-methyl group over the guanidinium group of Arg54 as it interacts with Gua at position 4 (Figure 3B). Typical homeodomains containing Thr47 display relaxed specificity at position 5.

**BS Position 6:** Like position 5, the determinants of specificity at this position appear influenced by the residues at positions 47, 50 and 54. Ade is modestly preferred over Gua when Gln50 and Met54 (Antp group) or Ala54 (En group) are present. Conversely, Gua is preferred over Ade when both Thr47 and Thr54 are present with Gln50 (Bar and NK-1 groups, Supplementary Figure 7C) or less exclusively when Tyr54 is present with Ile47 and Gln50 (NK-2 group). Finally, the presence of Lys50 provides a preference for Cyt at position 6 (Bcd and Six groups). The majority of atypical homeodomains with the exception of the Six group display no strong preference at this position.

## **Supplemental Experimental Procedures**

### **Identification and boundary definition of the independent homeodomains.**

These 84 homeodomains represent all of the fly homeodomains in the SMART database that are not associated with another major type of DNA-binding domain: 18 unique homeodomains are associated with PAX, POU or ZnF-C2H2 domains or an additional homeodomain based on the SMART annotation (Letunic et al., 2006; Schultz et al., 1998). There are homeodomains in our set that are associated with another DNA-binding domain, such as those in the Cut family, which were retained because of interesting sequence composition. The sequences of the homeodomains used in the BIH selection and the raw selected binding sites are found in Supplementary Table 1. The region of the homeodomain that was fused to omega was defined by the length of the core homeodomain identified by SMART: 60 to 63 amino acids depending on the presence of a TALE insertion. 10 additional amino acids in the protein sequence were included beyond the C-terminus of the homeodomain (if present). The amino acids were removed from the terminus if a hydrophobic residue occurred (YFIVLWPM), since terminal hydrophobic residues can induce protein degradation in E coli (Parsell et al., 1990).

### **Omega-Zif12 fusions for the selection of homeodomain specificity**

Homeodomains were expressed as omega fusions in combination with fingers one and two of Zif268 (Zif12) under control of the *lacUV5mut* promoter plasmid (pB1H2 $\omega$ 2-12HD; Supplementary Figure 1). Each homeodomain (with two additional N-terminal residues) was cloned between the KpnI site and the XbaI site downstream with a stop codon introduced just prior to the XbaI site. Two additional amino acids were added after the KpnI site prior to the start of the homeodomain. The first amino acid was always glycine. In the majority of the homeodomains, the second amino acid was the -1 amino acid of the specific homeodomain being assayed, however for a subset we used the -1 residue of Oct1, which is arginine, for purely historical reasons. The KpnI site and the inserted residues created a 5 amino acid linker between the 2nd His of Zif268 finger 2 and the beginning of the HD (Zif12-TGTGN-HD; Supplementary Figure 1). All expression constructs were sequence verified.

### **Construction of the ZF10 Library**

The ZF10 library was created by annealing oligonucleotides with complimentary ends to the library oligonucleotide to make duplex DNA with a gap spanning the randomized region and appropriate overhangs for cloning into the pH3U3 plasmid between the NotI and EcoRI sites upstream of the promoter controlling the HIS3 and URA3 genes.

ZF10 library oligonucleotide:

5'-GGCCGCCATGGATCCNNNNNNNNNTGGGCGGCTGATAGGCGCGCCG-3', 5 prime

complimentary oligonucleotide:

5'-GGATCCATGGC-3'

3 prime complimentary oligonucleotide:

5'-AATTCGGCGCGCCTATCAGCCGCCCA-3'

The oligonucleotides were 5' phosphorylated as a mixture by combining 200 pmol of each oligonucleotide in 100 $\mu$ l of 1xT4 polynucleotide kinase buffer (NEB) with 1mM ATP and 20 Units T4 polynucleotide kinase (NEB). This reaction was incubated at 37°C for 30 minutes and then boiled for 5 minutes before annealing by a gradual reduction in temperature to 4°C. 1  $\mu$ l of the phosphorylated, annealed

oligonucleotides (2  $\mu\text{M}$ ) was ligated into 1  $\mu\text{g}$  of gel purified pH3U3 plasmid backbone that had been digested with NotI and EcoRI in a 30  $\mu\text{l}$  reaction containing 1xT4 DNA Ligase buffer and 1  $\mu\text{l}$  of T4 DNA Ligase (400 units, NEB) overnight at 16°C. Following completion, the ligation reaction was ethanol precipitated, and the DNA pellet was resuspended in 2  $\mu\text{l}$  of H<sub>2</sub>O, and transformed into 80  $\mu\text{l}$  of electrocompetent XLI-Blue cells (Stratagene). The transformed cells were recovered in 50 ml SOC for 1 hour at 37°C. Following the recovery, a 200  $\mu\text{l}$  sample was titrated by 10-fold serial dilution on 2xYT plates containing 25  $\mu\text{g}/\text{ml}$  Kanamycin to determine the total number of transformants. The number of transformants in a dilution normalized to the fraction of library culture should reflect the constructed library size. Kanamycin (25  $\mu\text{g}/\text{ml}$ ) was then added to the remaining culture and the cells were expanded for an additional hour at 37°C. After expansion, the cells were plated on 10 large 2xYT plates (150mm round) containing 25  $\mu\text{g}/\text{ml}$  kanamycin and grown overnight at 37 °C. 200 $\mu\text{l}$  of the culture was again titrated by 10-fold dilutions on 2xYT plates containing kanamycin to determine the degree of expansion that occurred during the additional hour of growth. After these large plates had grown overnight, cells were harvested from these plates by resuspending the colonies in 10 ml 2xYT per plate. The resuspensions were pooled and cells pelleted by centrifugation for 15 minutes at 3000 rpm. The plasmid DNA was recovered from this pellet by scaling 20-fold the procedure for DNA isolation using the QIAGEN plasmid Miniprep Kit.

### Counterselection of the ZF10 library

Counterselections were performed on the ZF10 library to remove self-activating sequences. 1  $\mu\text{g}$  of raw ZF10 library material was transformed into 80  $\mu\text{l}$  of the *rpoZ* positive version of the selection strain (US0  $\Delta hisB$ ,  $\Delta pyrF$ ). These cells were recovered in SOC for 1 hour at 37°C while rotating. The cells were then pelleted by centrifugation for 15 minutes at 3000 rpm and the resulting pellet was resuspended in 5 ml of YM medium (a type of minimal medium). The cells were acclimated to the YM medium for 1 hour at 37°C while rotating. Following recovery the cells were pelleted, washed 2 times with YM medium (by pelleting and resuspension) and then resuspended in a final volume of 1 ml YM medium. 20  $\mu\text{l}$  of this final resuspension was titrated by 10-fold serial dilution on rich media plates (2xYT + 25  $\mu\text{g}/\text{ml}$  Kanamycin) to determine the total transformants. The titration plates were grown overnight at 37°C while the remaining 980  $\mu\text{l}$  cell resuspension was stored at 4 °C. The following day cells were counted from the rich media titrations and approximately  $5 \times 10^6$  transformants were plated on ten 150mm round YM plates containing 2.5mM 5-FOA. The plates were wrapped with parafilm and incubated at 37°C for 24 to 36 hours. The cells were then harvested from the plates and the plasmid DNA recovered as described above for the raw library.

### General selection procedure

Approximately 2  $\mu\text{g}$  of the bait plasmid (pB1H2 $\omega$ 2-12HD) and 50 ng of the library plasmid were electroporated into 80  $\mu\text{l}$  of the selection strain (US0  $\Delta hisB$ ,  $\Delta pyrF$ ,  $\Delta rpoZ$ ; *Noyes and Wolfe, unpublished results*). The cells and the two plasmids were mixed on ice and moved to a pre-chilled 1 mm electroporation cuvette. The cell and plasmid suspension was electroporated at 4°C and immediately resuspended in 10 ml pre-warmed SOC. The cells were then recovered while rotating at 37°C for 1 hour. Next, the cells were pelleted by centrifugation at 3000 rpm for 15 minutes and resuspended in 5 ml NM medium that was supplemented with 200 mM uracil, and 0.1% histidine (Meng and Wolfe, 2006). These cells were acclimated to the NM medium while rotating for 1 hour at 37°C. Cells were pelleted, washed 4 times in NM medium (no supplement) by sequential pelleting and resuspension and then resuspended to a final volume of 1 ml NM medium. 20 ml of this final resuspension was titrated by 10-fold serial dilutions on rich media plates (2xYT + 25  $\mu\text{g}/\text{ml}$  Kanamycin, and 100  $\mu\text{g}/\text{ml}$  Carbenicillin) to determine the total number of transformants. The titration plates were grown overnight at 37 °C while the remaining 980  $\mu\text{l}$  cell culture was stored at 4°C. The following day cell counts were determined from the rich media titrations and based on the total number of transformants, between  $1 \times 10^7$  and  $1 \times 10^8$  cells were placed on one 5 mM 3-AT and one 10mM 3-AT NM selective plate (150mm diameter rounds). Cells were spread on the plates with sterile glass beads and allowed to air dry under a flame. The plates were then wrapped individually with parafilm and grown at 37°C for 36 to 48 hours. Typically five to fifteen binding site selections were performed in parallel with positive and negative controls included to allow a qualitative assessment of the success of each experiment. Surviving colonies on each plate were counted and the fraction of surviving clones was determined based on the number of cells that were plated. A 10-fold increase in the fraction of surviving clones compared to the negative control (omega without a tethered TF)

was highly correlated with a successful selection. Selections with ratios lower than a 10-fold increase were successful in many instances, but in this range there was more variability in the number of sequenced clones that contained binding sites.

#### **Alternate selection conditions**

The vast majority of the selections were successful in the initial attempt, however a handful did not yield an obvious enrichment in the number of selected clones as defined by a low fold increase (or no increase) in the number of surviving clones on selective media relative to the background when normalized to the number of cells plated. In most cases this was resolved by expressing the omega-Zif12-homeodomain at higher levels using a stronger promoter (*lacUV5*). In the case of one homeodomain, Eve, where our initial selections failed, we found that the removal of a small string of hydrophobic residues from the C-terminus of the protein just after the end of the homeodomain resulted in a significant improvement in activity. Hydrophobic residues at the C-terminus of a protein can lead to lower levels of functional expression in bacteria (Parsell et al., 1990).

#### **Colony PCR and Sequencing**

The binding sites from successful selections were recovered by PCR amplification of the corresponding pH3U3 Library window from individual surviving colonies picked from each selection plate. These PCR products were sequenced to generate the desired data for computational analysis. PCR reactions were done in a 96-well plate format where 25  $\mu$ l of the PCR mix (1mM HU100 primer, 1mM OK181 primer, 300mM Denville dNTP mix, 1x NEB ThermoPol Buffer and 1 unit of NEB Taq polymerase) was added to each well of the plate. For each of the 96 wells, a single colony was picked from a selection plate with an autoclaved toothpick to inoculate the 25  $\mu$ l PCR mix. For each set of PCRs from a given selection plate a negative control reaction (no inoculation) was run in parallel in one well to insure that the appearance of an amplified product was not due a contaminating DNA source. Once each well had been inoculated, the plate was covered with aluminum film and placed in the thermocycler. The PCR reaction initiated with a single, 2 minute denaturation step at 94°C. This was followed by 35 reaction cycles consisting of one minute denaturation at 94°C, a 1.5 minute annealing step at 56°C, and a 2 minute extension at 68°C. After these 35 cycles were complete, there was a final extension for 5 minutes at 68°C. The plate was held at 4°C from that point until being removed from the block. To confirm successful PCR reactions, 5  $\mu$ l of each 25  $\mu$ l PCR reaction was run out on a 1.5% agarose gel and the mobility of product in each well was compared to a DNA ladder standard (NEB). Successful plates were sequencing (Agencourt) using HU100 as the sequencing primer.

HU100

5'-GAAATATGTATCCGCTCATGAC-3'

OK181

5'-CCAGAGCATGTATCATATGGTCCAGAAACCC-3'

#### **Construction of the master alignment of sites:**

The master alignment contains 1860 binding sites for 83 of the 84 Drosophila homeodomain proteins as well as Oct1 (Lag1 was excluded because it lacks Asn51, which makes the alignment of its sites to all others within the dataset problematic). CONSENSUS selected substrings from 1868 of the 2211 input sequences and took the reverse complement of 657 of these substrings, wherein alignments were generated for each factor independently (Hertz and Stormo, 1999). In every case, the length of the motif was selected by varying the motif length parameter (-L) and selecting the alignment with the smallest e-value. These 84 separate alignments formed the basis for the construction of the master alignment. The orientation of the alignments for individual factors produced by CONSENSUS was somewhat arbitrary; consequently, we manually reversed the orientation of 35 sets of sequences (about 588 sites). As described previously, the high information content Ade (recognized by Asn51) was used as an anchor to help align the sets of sites (notice that all but 4 sites contain Ade at position 6 in the master alignment below). Information about the probable orientation of each individual site gleaned from the observed site biases (described above) led us to manually 'flip' the orientation of some individual sites (47), overriding some orientation decisions made by CONSENSUS. For the master alignment of all 84 sets of sites we used the entire sequence of each aligned site, not just the 1868 substrings returned by CONSENSUS (8 problematic sites were removed; Supplementary Table 3). At this point, the alignment contained 15 columns as the registers of the aligned subsites in each sequence varied, so the 5' and 3' flanking columns 1, 2, 13, 14, and 15 were removed to

generate a master alignment with 10 columns because from 57 to 99 percent of these columns were comprised of gaps as the library sequence elements are only 10 bp in length.

Count matrix for the entire master alignment:

|   | 1   | 2   | 3    | 4    | 5    | 6    | 7    | 8    | 9   | 10  |
|---|-----|-----|------|------|------|------|------|------|-----|-----|
| A | 297 | 435 | 269  | 78   | 1511 | 1856 | 48   | 326  | 983 | 260 |
| C | 310 | 396 | 419  | 66   | 1    | 0    | 219  | 143  | 109 | 254 |
| G | 242 | 446 | 161  | 19   | 213  | 2    | 84   | 328  | 512 | 345 |
| T | 358 | 542 | 1006 | 1697 | 135  | 2    | 1509 | 1063 | 60  | 119 |
| - | 653 | 41  | 5    | 0    | 0    | 0    | 0    | 0    | 196 | 882 |

All Sequence logos (Schneider and Stephens, 1990) for these factors were generated using WebLogo (Crooks et al., 2004). We note that the number of selected binding sites that comprise a particular logo are modest (typically 20 to 40) and consequently, the significance of bases that are absent or occur infrequently in a motif cannot be fully assessed.

### Clustering of binding site motifs

The master alignment of sites was used to determine the pairwise global alignments between every set of homeodomain binding sites. The aligned sites for each homeodomain protein were converted to count matrices. Pairwise distances between all matrices were calculated based on average log likelihood ratio (ALLR) similarity scores (Wang and Stormo, 2003). When calculating the ALLR scores, gaps were treated as missing data and ignored. The formula for the ALLR score was modified slightly: instead of using the natural logarithm function (log base e), log base 2 was used. The Neighbor program from the Phylip phylogenetic analysis package (Felsenstein, 2005) was used to cluster the motifs using the neighbor joining method. The input to Neighbor was a pairwise distance table based on the master alignment of sites. The radial logarithmic neighbor joining tree of the motifs in Figure 2 was produced using the TreeIllustrator program (Trooskens et al., 2005). The branch lengths displayed in this image are logarithmically proportional to the actual branch lengths calculated by the Neighbor program. The phylogram of the homeodomain amino acid sequences in Figure 2 was produced using TreeIllustrator with the pairwise distances determined by ClustalW (Thompson et al., 1994).

### MI analysis

MI analysis was performed on the dataset using the Master alignment of binding sites as previously described (Gutell et al., 1992). The MI plot was transformed into a joint rank product matrix by transforming each element in the MI matrix by calculating the rank of each element's MI value in that column (the column-wise rank) and the rank of each element's MI value in that row (the row-wise rank). The column-wise rank and row-wise rank for each element were multiplied to yield the joint rank product matrix. The product matrix was transformed to generate a heat plot using the following formula:

$$\frac{\max(\text{Ln}(X)) - \text{Ln}(X_{ij})}{\max(\text{Ln}(X))}$$

where  $X_{ij}$  is the joint rank product matrix element ij and  $\max(X)$  is the maximum value in X (600).

### G-test significance analysis

The significance of an apparent difference between motifs for two groups of homeodomains was estimated using a G-test (Sokal and Rohlf, 1995). Aligned binding sites for each group of factors were pooled and one position (column) in the DNA binding motif was analyzed by generating a 2 by 4 contingency table, where rows contained the 2 classes and columns 4 DNA bases. Small pseudo counts (0.01) were added to each value and the G-test statistic was calculated allowing 3 degrees of freedom for each base, unless a base was not observed in both of the two classes, in which case 1 degree of freedom was subtracted.

### Competition Gel Shift Assay Oligonucleotides.

The Oligonucleotides used for this assay were designed to have a single, central homeodomain binding site that represents the consensus recognition sequence of one of 7 core specificity groups (Engrailed, Bar,

## Cell, Volume 133

Abd-B, Bicoid, NK-2, Six, and TGIF) as well as one outlier (CG11617). Once annealed, the resulting duplex oligonucleotides contain a 5' GG overhang at each end that can be used to radiolabel the DNA. These sequences of the oligonucleotides are listed below with the recognition sequence in **bold**. Where multiple binding sites were examined for a single specificity group, the differences within these sequences are underlined:

Engrailed Top  
GGGCAGGCAG**TAATT**AGGACGTCG  
Engrailed Bottom  
GGCGACGTCC**TAATT**ACTGCCTGC  
Bar Top  
GGGCAGGCAG**TAATT**GAGGACGTCG  
Bar Bottom  
GGCGACGTCC**CAATT**ACTGCCTGC  
Abd-B-A Top  
GGGCAGGCAG**TTATT**AGGACGTCG  
Abd-B-A Bottom  
GGCGACGTCC**AATAA**ACTGCCTGC  
Abd-B-G Top  
GGGCAGGCAG**TTATT**GAGGACGTCG  
Abd-B-G Bottom  
GGCGACGTCC**CAATAA**ACTGCCTGC  
Bicoid Top  
GGGCAGGCAG**TAATC**CGGACGTCG  
Bicoid Bottom  
GGCGACGTCC**GGATT**ACTGCCTGC  
NK-2 Top  
GGGCAGGCAG**CAAGT**GAGGACGTCG  
NK-2 Bottom  
GGCGACGTCC**ACTTG**CTGCCTGC  
CG11617-A Top  
GGGCAGGCAG**TTAAC**AGGACGTCG  
CG11617-A Bottom  
GGCGACGTCC**TGTTA**ACTGCCTGC  
CG11617-C Top  
GGGCAGGCAG**TTAC**AGGACGTCG  
CG11617-C Bottom  
GGCGACGTCC**TGTGA**ACTGCCTGC  
CG11617-T Top  
GGGCAGGCAG**TTTAC**AGGACGTCG  
CG11617-T Bottom  
GGCGACGTCC**TGTA**ACTGCCTGC  
Six Top  
GGGCAGGCAG**TGATA**CGGACGTCG  
Six Bottom  
GGCGACGTCC**GTATC**ACTGCCTGC  
TGIF Top  
GGGCAGGCAG**TTGAC**AGGACGTCG  
TGIF Bottom  
GGCGACGTCC**TGTCA**ACTGCCTGC

### Expression and Purification of Proteins.

Each homeodomain was expressed as a C-terminal fusion to maltose binding protein (MBP) from pJH196 (a generous gift from Keith Joung, (Hurt et al., 2003)) using an *in vitro* transcription-translation system (Expressway™ Cell-Free E. coli Expression System, Invitrogen). The zinc fingers utilized for the binding site selection in the B1H system were not incorporated into these constructs. Each MBP-HD construct was

expressed in two 100ml reactions from approximately 2mg of plasmid DNA per reaction. These reactions were incubated while rotating for 6.5 hours at 37°C. The reactions for each construct were combined together with one of the binding buffers listed below (900 ml final volume) and the MBP-HD proteins were captured on 100ml of Amylose Resin (New England BioLabs) by incubation at 4 °C for 1.5 hours while rotating. The resin-bound MBP-HD proteins were washed 4 times with 1ml binding buffer. Finally, the protein was eluted from the resin by incubation with 50ml of binding buffer supplemented with 40mM maltose at room temperature, while rotating for 30 minutes. Aliquots of protein were stored at -80°C.

Two different binding buffers were used in these experiments. The majority of the gel shift assays utilized a binding buffer consisting of 10mM Tris-HCl pH 7.5, 0.1mM EDTA, 25mM NaCl, 1mM DTT and 5% glycerol. The more complex binding buffer for Ptx and Caudal consisted of 15mM HEPES pH 7.8, 50mM KCl, 50mM KGlutamate, 50mM KOAc, 5mM MgCl<sub>2</sub>, 1mM DTT and 5% glycerol. All binding buffers were supplemented with 0.1mg/ml BSA and 0.1% IGEPAL CA-630 for the gel-shift assays.

### **Gel Shift Competitions.**

To perform the competition gel shift assays, oligonucleotides for the consensus binding site corresponding to each homeodomain were annealed and then endlabeled. 30 ml labeling reactions were done using 200ng of annealed oligonucleotide, 40mCi a-<sup>32</sup>P dCTP, 5 units Klenow (exo-), and a final concentration of 3.33mM dNTPs minus dCTP. These reactions were incubated at 37°C for 30 minutes and then chased with 3.33mM dNTPs (including dCTP) for an additional 30 minutes at 37°C. The labeled oligonucleotides were recovered from free radionucleotides using a G-25 spin column (BioRAD).

The optimal amount of protein for each homeodomain to be used in the DNA-binding reaction for the competition assay was determined by performing shift assays with a titration of protein on its labeled consensus site. Titrations of both protein and DNA were performed to ensure that binding reactions were under K<sub>d</sub> conditions with [labeled DNA] << K<sub>d</sub> and that the amount of HD-DNA complex formation was not saturated (data not shown). The appropriate concentration of cold consensus binding site needed to effectively compete the majority of the HD-DNA\* complex at the optimal protein concentration was determined by titration of competitor (data not shown).

The competition assays were then performed by equilibrating the homeodomain with 80pM of its labeled target site and one of the cold competitor duplexes in a 20ml reaction for at least 2 hours at room temperature. Each protein was challenged in a separate reaction with each of the eight of the specificity group binding site oligonucleotides and one control reaction without competitor. The final concentrations of cold competitor DNA used for each homeodomain is as follows:

CG11617 used 5.625nM

En, Vis, and Tin used 9nM

Lbe, Optix, CG34031, Ptx, and Cad used 90nM

10ml of each reaction was then run on a pre-run (35 minutes at 300V) 7.5% native polyacrylamide gel (0.5xTBE) for 35 minutes at 300V. The gels were dried and then exposed phosphoimaging plates for 8-12 hours. These plates were scanned with a FUJIFILM FLA-5000 and the percentage of protein-DNA complex in each reaction was determined by quantifying the free DNA and bound DNA bands with FUJIFILM's program, Image Gauge 4.22.

### **Supplemental References**

Ades, S.E., and Sauer, R.T. (1994). Differential DNA-binding specificity of the engrailed homeodomain: the role of residue 50. *Biochemistry* 33, 9187-9194.

Ades, S.E., and Sauer, R.T. (1995). Specificity of minor-groove and major-groove interactions in a homeodomain-DNA complex. *Biochemistry* 34, 14601-14608.

Banerjee-Basu, S., and Baxevanis, A.D. (2001). Molecular evolution of the homeodomain family of transcription factors. *Nucl Acids Res* 29, 3258-3269.

Crooks, G.E., Hon, G., Chandonia, J.M., and Brenner, S.E. (2004). WebLogo: a sequence logo generator. *Genome research* 14, 1188-1190.

Damante, G., Pellizzari, L., Esposito, G., Fogolari, F., Viglino, P., Fabbro, D., Tell, G., Formisano, S., and Di Lauro, R. (1996). A molecular code dictates sequence-specific DNA recognition by homeodomains. *Embo J* 15, 4992-5000.

- Ekker, S.C., Jackson, D.G., von Kessler, D.P., Sun, B.I., Young, K.E., and Beachy, P.A. (1994). The degree of variation in DNA sequence recognition among four *Drosophila* homeotic proteins. *EMBO J* *13*, 3551-3560.
- Ekker, S.C., von Kessler, D.P., and Beachy, P.A. (1992). Differential DNA sequence recognition is a determinant of specificity in homeotic gene action. *EMBO J* *11*, 4059-4072.
- Felsenstein, J. (2005). PHYLIP (Phylogeny Inference Package) version 3.6. Distributed by the author Department of Genome Sciences, University of Washington, Seattle.
- Fraenkel, E., and Pabo, C.O. (1998). Comparison of X-ray and NMR structures for the Antennapedia homeodomain-DNA complex. *Nat Struct Biol* *5*, 692-697.
- Fraenkel, E., Rould, M.A., Chambers, K.A., and Pabo, C.O. (1998). Engrailed homeodomain-DNA complex at 2.2 Å resolution: a detailed view of the interface and comparison with other engrailed structures. *Journal of molecular biology* *284*, 351-361.
- Grant, R.A., Rould, M.A., Klemm, J.D., and Pabo, C.O. (2000). Exploring the role of glutamine 50 in the homeodomain-DNA interface: crystal structure of engrailed (Gln50 --> ala) complex at 2.0 Å. *Biochemistry* *39*, 8187-8192.
- Gruschus, J.M., Tsao, D.H., Wang, L.H., Nirenberg, M., and Ferretti, J.A. (1997). Interactions of the vnd/NK-2 homeodomain with DNA by nuclear magnetic resonance spectroscopy: basis of binding specificity. *Biochemistry* *36*, 5372-5380.
- Gutell, R.R., Power, A., Hertz, G.Z., Putz, E.J., and Stormo, G.D. (1992). Identifying constraints on the higher-order structure of RNA: continued development and application of comparative sequence analysis methods. *Nucl Acids Res* *20*, 5785-5795.
- Hanes, S.D., and Brent, R. (1989). DNA specificity of the bicoid activator protein is determined by homeodomain recognition helix residue 9. *Cell* *57*, 1275-1283.
- Harvey, R.P. (1996). NK-2 homeobox genes and heart development. *Developmental biology* *178*, 203-216.
- Hertz, G.Z., and Stormo, G.D. (1999). Identifying DNA and protein patterns with statistically significant alignments of multiple sequences. *Bioinformatics (Oxford, England)* *15*, 563-577.
- Hovde, S., Abate-Shen, C., and Geiger, J.H. (2001). Crystal structure of the Msx-1 homeodomain/DNA complex. *Biochemistry* *40*, 12013-12021.
- Hurt, J.A., Thibodeau, S.A., Hirsh, A.S., Pabo, C.O., and Joung, J.K. (2003). Highly specific zinc finger proteins obtained by directed domain shuffling and cell-based selection. *Proc Natl Acad Sci U S A* *100*, 12271-12276.
- Joshi, R., Passner, J.M., Rohs, R., Jain, R., Sosinsky, A., Crickmore, M.A., Jacob, V., Aggarwal, A.K., Honig, B., and Mann, R.S. (2007). Functional specificity of a Hox protein mediated by the recognition of minor groove structure. *Cell* *131*, 530-543.
- Kim, D.W., Kempf, H., Chen, R.E., and Lassar, A.B. (2003). Characterization of Nkx3.2 DNA binding specificity and its requirement for somitic chondrogenesis. *J Biol Chem* *278*, 27532-27539.
- Letunic, I., Copley, R.R., Pils, B., Pinkert, S., Schultz, J., and Bork, P. (2006). SMART 5: domains in the context of genomes and networks. *Nucl Acids Res* *34*, D257-260.
- Liu, X., Brutlag, D.L., and Liu, J.S. (2001). BioProspector: discovering conserved DNA motifs in upstream regulatory regions of co-expressed genes. *Pac Symp Biocomput* *6*, 127-138.

- Meng, X., and Wolfe, S.A. (2006). Identifying DNA sequences recognized by a transcription factor using a bacterial one-hybrid system. *Nat protocols* 1, 30-45.
- Mukherjee, K., and Burglin, T.R. (2007). Comprehensive Analysis of Animal TALE Homeobox Genes: New Conserved Motifs and Cases of Accelerated Evolution. *J Mol Evol* 65, 137-153.
- Parsell, D.A., Silber, K.R., and Sauer, R.T. (1990). Carboxy-terminal determinants of intracellular protein degradation. *Genes Dev* 4, 277-286.
- Pellizzari, L., Tell, G., Fabbro, D., Pucillo, C., and Damante, G. (1997). Functional interference between contacting amino acids of homeodomains. *FEBS Lett* 407, 320-324.
- Percival-Smith, A., Müller, M., Affolter, M., and Gehring, W.J. (1990). The interaction with DNA of wild-type and mutant fushi tarazu homeodomains. *EMBO J* 9, 3967-3974.
- Piper, D.E., Batchelor, A.H., Chang, C.P., Cleary, M.L., and Wolberger, C. (1999). Structure of a HoxB1-Pbx1 heterodimer bound to DNA: role of the hexapeptide and a fourth homeodomain helix in complex formation. *Cell* 96, 587-597.
- Pomerantz, J.L., Sharp, P.A., and Pabo, C.O. (1995). Structure-based design of transcription factors. *Science* 267, 93-96.
- Schneider, T.D., and Stephens, R.M. (1990). Sequence logos: a new way to display consensus sequences. *Nucl Acids Res* 18, 6097-6100.
- Schultz, J., Milpetz, F., Bork, P., and Ponting, C.P. (1998). SMART, a simple modular architecture research tool: Identification of signaling domains. *Proceedings of the National Academy of Sciences of the United States of America* 95, 5857-5864.
- Sokal, R.R., and Rohlf, F.J. (1995). *Biometry: the principles and practice of statistics in biological research.*, 3rd edition edn (New York, W. H. Freeman and Co.).
- Thompson, J.D., Higgins, D.G., and Gibson, T.J. (1994). CLUSTAL W: improving the sensitivity of progressive multiple sequence alignment through sequence weighting, position-specific gap penalties and weight matrix choice. *Nucl Acids Res* 22, 4673-4680.
- Treisman, J., Gönczy, P., Vashishtha, M., Harris, E., and Desplan, C. (1989). A single amino acid can determine the DNA binding specificity of homeodomain proteins. *Cell* 59, 553-562.
- Trooskens, G., De Beule, D., Decouttere, F., and Van Criekinge, W. (2005). Phylogenetic trees: visualizing, customizing and detecting incongruence. *Bioinformatics (Oxford, England)* 21, 3801-3802.
- Verrijzer, C.P., Alkema, M.J., van Weperen, W.W., Van Leeuwen, H.C., Strating, M.J., and van der Vliet, P.C. (1992). The DNA binding specificity of the bipartite POU domain and its subdomains. *EMBO J* 11, 4993-5003.
- Wang, T., and Stormo, G.D. (2003). Combining phylogenetic data with co-regulated genes to identify regulatory motifs. *Bioinformatics (Oxford, England)* 19, 2369-2380.
- Wolberger, C., Vershon, A.K., Liu, B., Johnson, A.D., and Pabo, C.O. (1991). Crystal structure of a MATalpha2 homeodomain-operator complex suggests a general model for homeodomain-DNA interactions. *Cell* 67, 517-536.
